# Supplementary material for: Proerythroblast Cells of Diamond-Blackfan Anemia Patients With RPS19 and CECR1 Mutations Have Similar Transcriptomic Signature
Source: Frontiers journal article supplement (doi:10.3389/fphys.2021.679919), 2021-06-11
Supplement: Data_Sheet_1.PDF [file Data_Sheet_1.PDF]

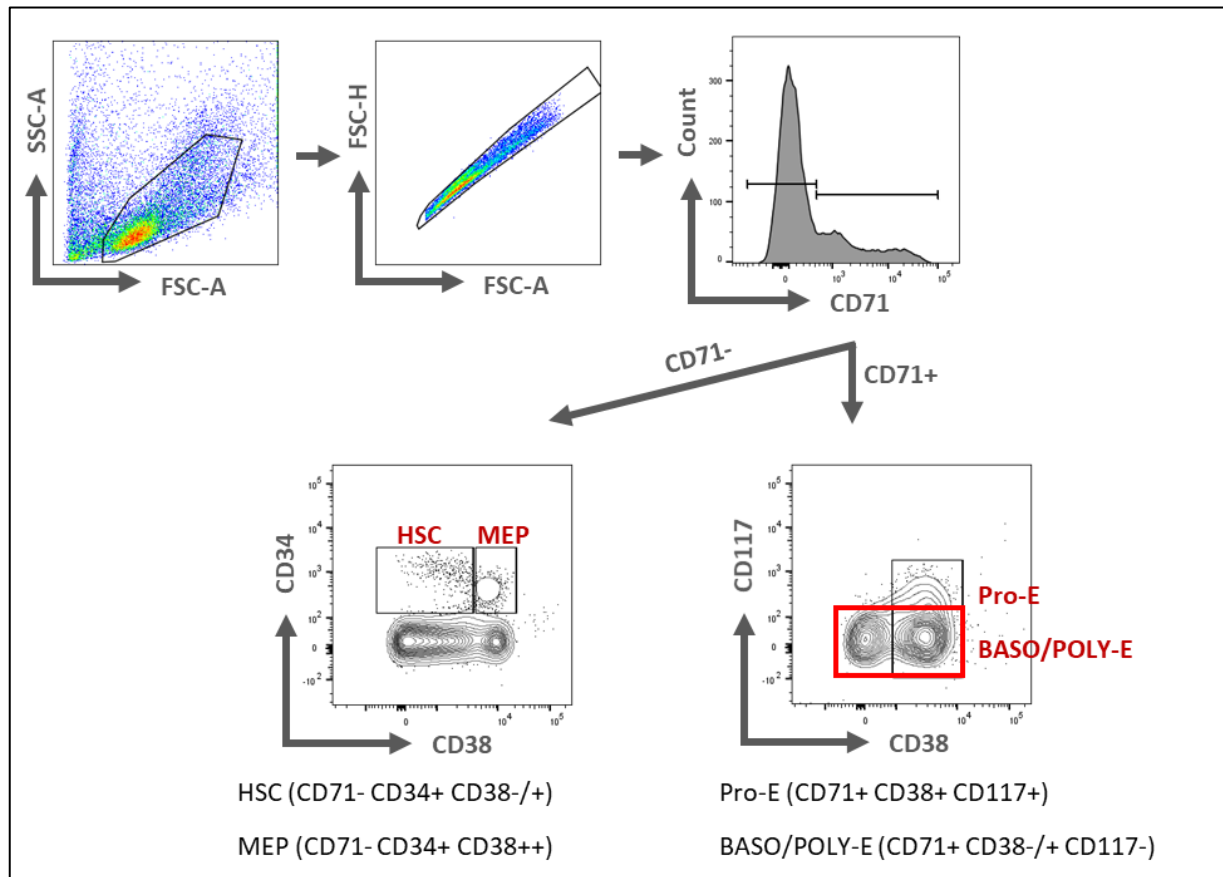

**Supplementary Figure 1.** Gating strategy for immunophenotyping and cell sorting. HSC: Hematopoietic Stem Cell (HSC), MEP: Megakaryocyte–Erythroid Progenitor Cell, Pro-E: Proerythroblast, Baso/Poly-E: Basophilic and Polychromatophilic Erythroblasts.
