# Supplementary material for: Proerythroblast Cells of Diamond-Blackfan Anemia Patients With RPS19 and CECR1 Mutations Have Similar Transcriptomic Signature
Source: Frontiers journal article supplement (doi:10.3389/fphys.2021.679919), 2021-06-11
Supplement: Data_Sheet_3.PDF [file Data_Sheet_3.PDF]

Up-regulated pathways of DBA proerythroblasts

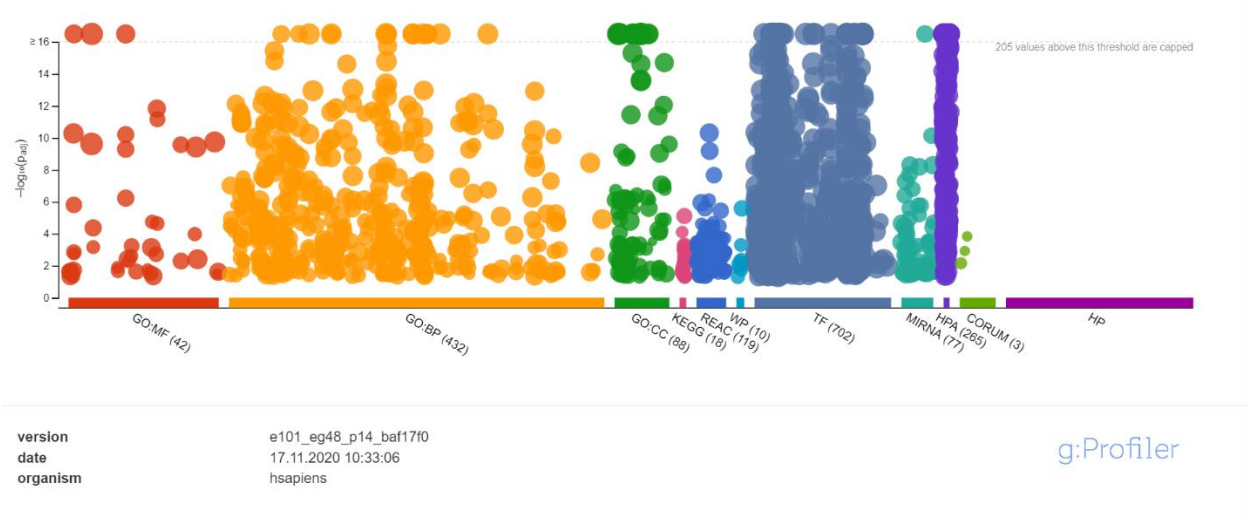

Down-regulated pathways of DBA proerythroblasts

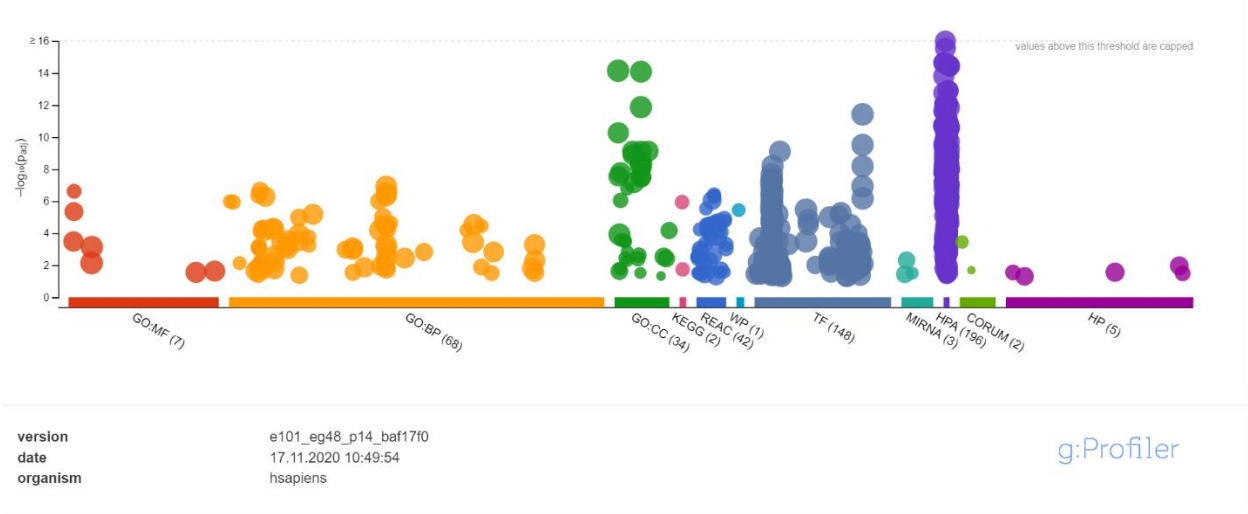

Up-regulated pathways of DBA MEPs

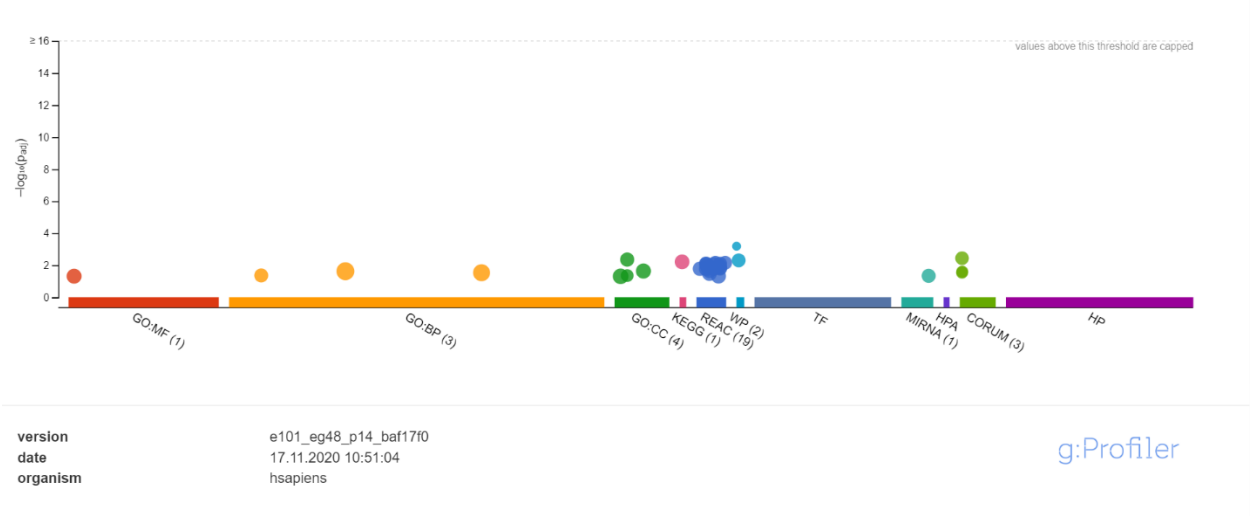

Down-regulated pathways of DBA MEPs

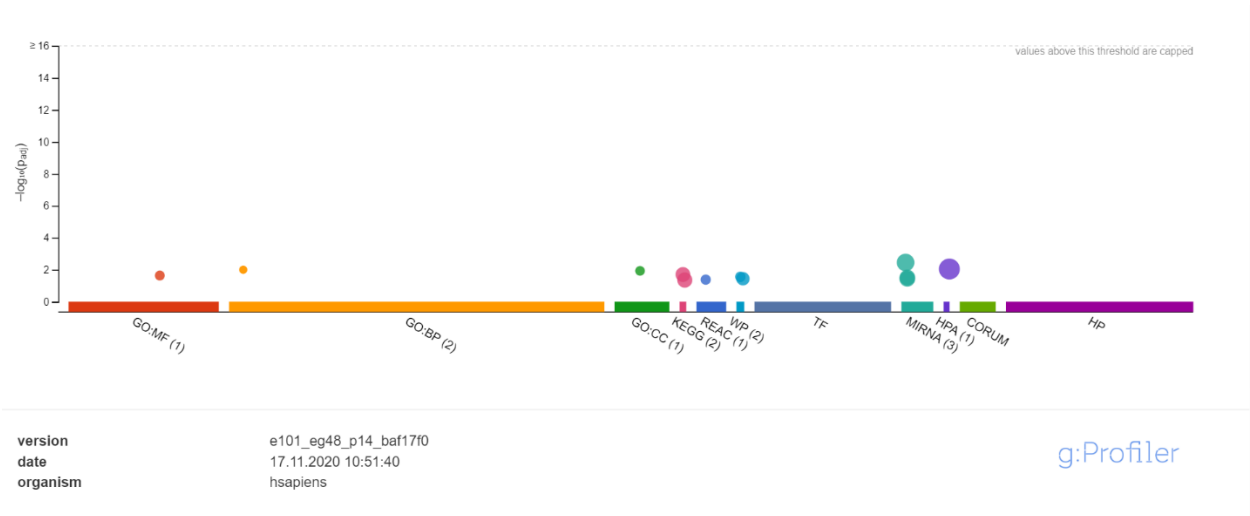

Up-regulated pathways of DBA HSCs

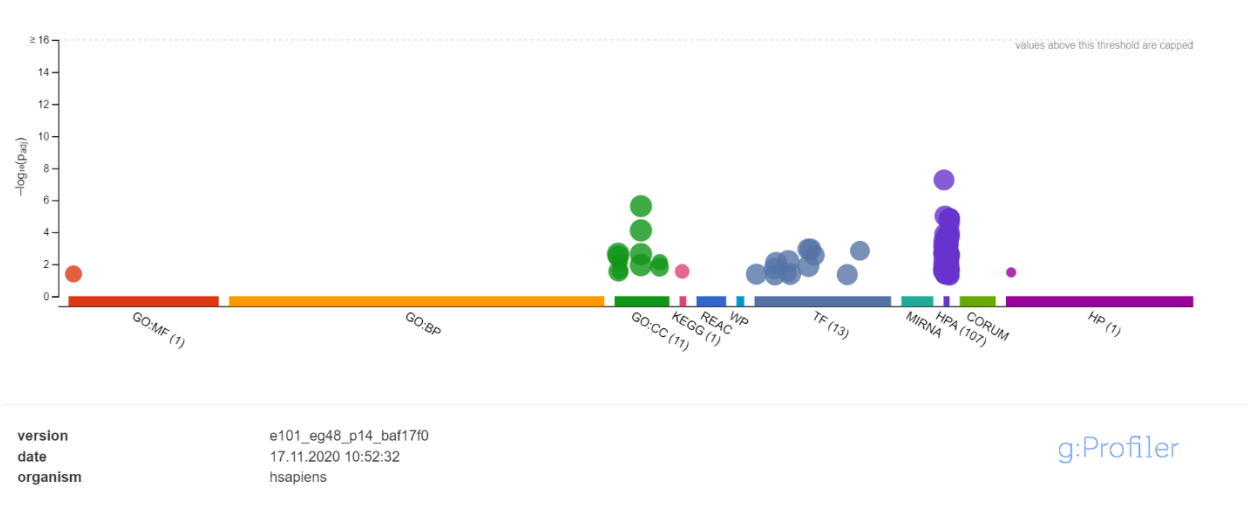

Down-regulated pathways of DBA HSCs

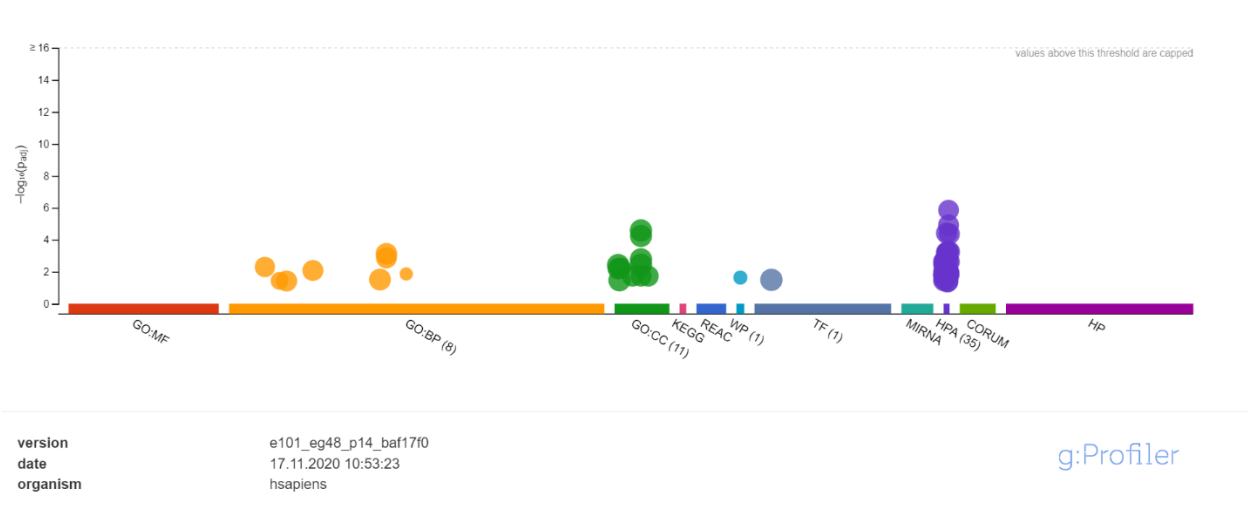

Supplementary Figure 3. Pathway enrichment analysis.
