# Supplementary material for: Proerythroblast Cells of Diamond-Blackfan Anemia Patients With RPS19 and CECR1 Mutations Have Similar Transcriptomic Signature
Source: Frontiers journal article supplement (doi:10.3389/fphys.2021.679919), 2021-06-11
Supplement: Data_Sheet_5.PDF [file Data_Sheet_5.PDF]

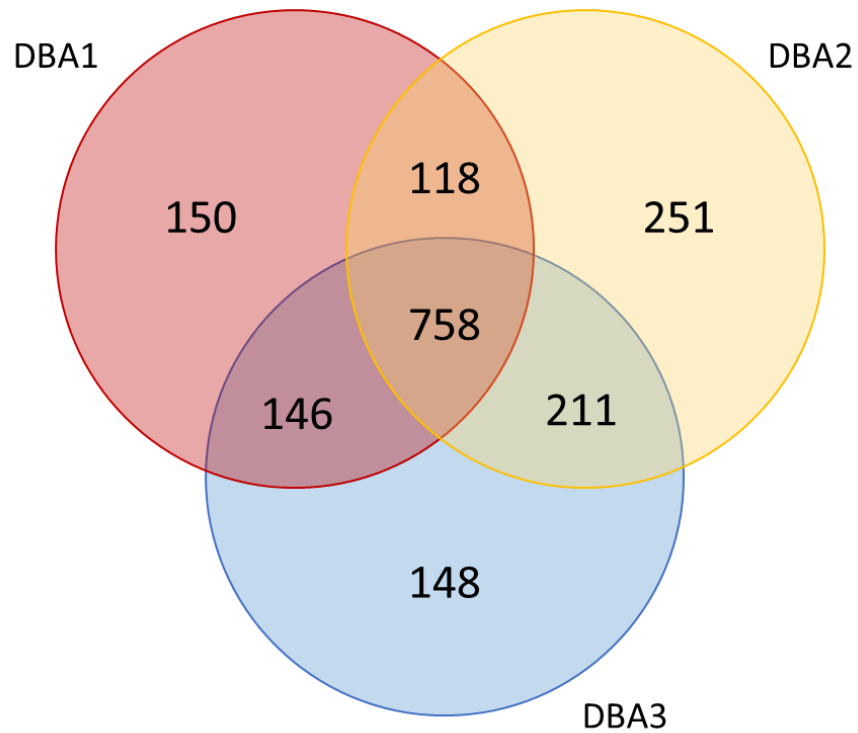

**Supplementary Figure 5.** Venn diagram of intersections between differentially expressed genes in each DBA patient. Differentially expressed gene numbers obtained by comparing proerythroblasts of healthy donors.
