# Supplementary material for: Proerythroblast Cells of Diamond-Blackfan Anemia Patients With RPS19 and CECR1 Mutations Have Similar Transcriptomic Signature
Source: Frontiers journal article supplement (doi:10.3389/fphys.2021.679919), 2021-06-11
Supplement: Data_Sheet_6.PDF [file Data_Sheet_6.PDF]

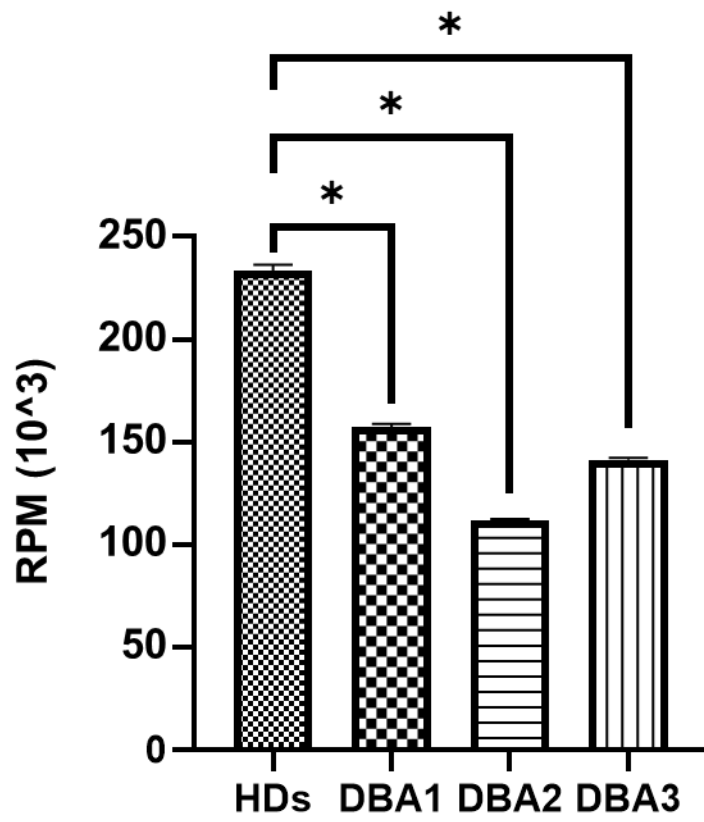

**Supplementary Figure 6.** Total ribosomal protein expression of donor and DBA proerythroblasts. RPM: reads per million, HDs: Healthy donors. \*p value < 0,0001
