# Supplementary material for: Proerythroblast Cells of Diamond-Blackfan Anemia Patients With RPS19 and CECR1 Mutations Have Similar Transcriptomic Signature
Source: Front Physiol. 2021 Jun 11;12:679919. doi: 10.3389/fphys.2021.679919 (PMC8226250; doi:10.3389/fphys.2021.679919)
Supplement: Supplementary file 7 [file Table_1.XLSX]

## Sheet: Sheet1
Supplementary Table 1. Read numbers and targeted reads of all the samples
	Sample	Mapped Reads
	HSC-HD I	11,555,900
	HSC-HD II	10,776,726
	HSC-DBA1 I	9,913,039
	HSC-DBA1 II	8,865,971
	HSC-DBA2 I	11,878,837
	HSC-DBA2 II	11,005,946
	HSC-DBA3 I	10,098,907
	HSC-DBA3 II	9,641,578
	MEP-HD I	11,778,702
	MEP-HD II	10,840,910
	MEP-DBA1 I	11,281,001
	MEP-DBA1 II	10,417,771
	MEP-DBA2 I	10,342,400
	MEP-DBA2 II	9,838,491
	MEP-DBA3 I	12,239,667
	MEP-DBA3 II	11,071,080
	PROE-HD I	9,210,908
	PROE-HD II	9,373,291
	PROE-DBA1 I	10,226,414
	PROE-DBA1 II	9,424,691
	PROE-DBA2 I	10,979,365
	PROE-DBA2 II	11,610,979
	PROE-DBA3 I	10,744,559
	PROE-DBA3 II	11,552,281
