# Supplementary material for: Proerythroblast Cells of Diamond-Blackfan Anemia Patients With RPS19 and CECR1 Mutations Have Similar Transcriptomic Signature
Source: Front Physiol. 2021 Jun 11;12:679919. doi: 10.3389/fphys.2021.679919 (PMC8226250; doi:10.3389/fphys.2021.679919)
Supplement: Supplementary file 10 [file Table_4.XLSX]

## Sheet: Sheet1
Supplementary Table 2c. Differentially expressed genes of DBA MEPs.
Regulation	Ensembl ID	log2 Fold Change	Adj.Pval	Symbol
Up	ENSG00000124762	5.62118	0.00541	CDKN1A
Up	ENSG00000115738	3.31095	0.0165	ID2
Up	ENSG00000104979	2.95941	0.0225	C19orf53
Up	ENSG00000126705	2.71711	0.0403	AHDC1
Up	ENSG00000087470	2.67359	0.0471	DNM1L
Up	ENSG00000102898	2.29129	0.0225	NUTF2
Up	ENSG00000149806	2.07292	0.0497	FAU
Up	ENSG00000158710	2.04744	0.0471	TAGLN2
Up	ENSG00000219200	1.99066	0.0346	RNASEK
Up	ENSG00000142227	1.79255	0.0403	EMP3
Up	ENSG00000070495	1.7609	0.0403	JMJD6
Up	ENSG00000095574	1.74521	0.0403	IKZF5
Up	ENSG00000115268	1.71117	0.0403	RPS15
Up	LOC606724	1.43657	0.0471	LOC606724
Up	ENSG00000147403	1.39676	0.0497	RPL10
Down	ENSG00000204525	-6.69952	8.55e-05	HLA-C
Down	ENSG00000206450	-3.18807	0.0403	HLA-B
Down	ENSG00000170345	-2.99584	0.0403	FOS
Down	ENSG00000177084	-2.78154	0.00675	POLE
Down	ENSG00000187109	-2.65406	0.018	NAP1L1
Down	ENSG00000138071	-2.62316	0.0346	ACTR2
Down	ENSG00000143384	-2.50889	0.018	MCL1
Down	ENSG00000104687	-2.41014	0.0446	GSR
Down	ENSG00000005381	-2.39917	0.0403	MPO
Down	ENSG00000107581	-2.39159	0.0225	EIF3A
Down	ENSG00000115956	-2.31763	0.043	PLEK
Down	ENSG00000115053	-2.31365	0.018	NCL
Down	ENSG00000102317	-2.30075	0.0403	RBM3
Down	ENSG00000122958	-2.27026	0.0497	VPS26A
Down	ENSG00000132386	-2.24384	0.0225	SERPINF1
Down	ENSG00000171862	-2.18391	0.0292	PTEN
Down	ENSG00000124783	-2.18111	0.0403	SSR1
Down	ENSG00000198837	-2.1715	0.0403	DENND4B
Down	ENSG00000115239	-2.15399	0.0225	ASB3
Down	ENSG00000163161	-2.07925	0.0497	ERCC3
Down	ENSG00000086758	-2.01918	0.0346	HUWE1
Down	ENSG00000138757	-2.00259	0.0237	G3BP2
Down	ENSG00000105810	-1.95329	0.0497	CDK6
Down	ENSG00000172650	-1.91177	0.0295	AGAP5
Down	ENSG00000196497	-1.86797	0.0403	IPO4
Down	ENSG00000167977	-1.76319	0.0403	KCTD5
Down	ENSG00000051825	-1.53969	0.0403	MPHOSPH9
Down	NOTCH2NL	-1.51463	0.0471	NOTCH2NL
