# Supplementary material for: Proerythroblast Cells of Diamond-Blackfan Anemia Patients With RPS19 and CECR1 Mutations Have Similar Transcriptomic Signature
Source: Front Physiol. 2021 Jun 11;12:679919. doi: 10.3389/fphys.2021.679919 (PMC8226250; doi:10.3389/fphys.2021.679919)
Supplement: Supplementary file 11 [file Table_5.XLSX]

## Sheet: Sheet1
Supplementary Table 3. Pathway enrichment analysis of up-regulated genes of DBA proerythroblasts
source	term_name	term_id	adjusted_p_value	negative_log10_of_adjusted_p_value	term_size	query_size	intersection_size	effective_domain_size	intersections
GO:BP	regulation of cellular metabolic process	GO:0031323	2.82138e-06	2.05495e+16	6399	629	347	18017	BAZ2A,CHP1,PAFAH1B2,CTNNB1,EZR,ECD,AP2M1,CASP3,HLA-DRB1,MEPCE,PSMD11,HIPK3,NOP2,ORC1,NUP214,PUM2,EHMT2,SIN3A,SUPT5H,DHX9,PPP4C,ADAR,USP22,CHCHD2,GATA1,STOML2,VCP,KLF13,PTBP1,TRAF7,CXXC5,HBP1,LAMTOR1,NOLC1,RAF1,MTPN,TFDP2,CDK4,DDA1,PTPN1,GPX1,PFDN5,QSOX1,NAMPT,CCNT1,RTF1,ZNFX1,MYH9,CTDSP1,GNAQ,LIMK1,ITGA5,NFIC,ACTN4,GRB2,VDAC1,MYBL2,ATP6AP2,DRAP1,SLC39A8,ATF6,EIF3C,ACSL3,NUMB,OTUB1,CAPNS1,CCT3,DNM…
GO:BP	cellular metabolic process	GO:0044237	0.000537166	1826989180759584	10936	629	494	18017	BAZ2A,CHP1,PAFAH1B2,CTNNB1,EZR,TPP2,ECD,INPP5D,AP2M1,CASP3,HLA-DRB1,MEPCE,PSMD11,HIPK3,NOP2,ORC1,NUP214,ATG3,MRPL38,PUM2,EHMT2,SIN3A,SUPT5H,ARMC8,DHX9,PPP4C,ADAR,USP22,CHCHD2,GATA1,STOML2,VCP,KLF13,PTBP1,SMC1A,TRAF7,CXXC5,HBP1,LAMTOR1,TOMM40,NOLC1,RAF1,MTPN,TFDP2,CDK4,DDA1,PTPN1,GPX1,PFDN5,QSOX1,TPP1,NAMPT,PTPRE,DCPS,CCNT1,PI4KB,RTF1,ZNFX1,MYH9,CTDSP1,GNAQ,LIMK1,ITGA5,NFIC,P4HB,ACTN4,GRB2,VDAC1,B…
GO:BP	viral process	GO:0016032	0.000791499	1.81015e+16	927	629	96	18017	AP1M1,CTNNB1,AP2M1,HLA-DRB1,NUP214,SEPT6,SUPT5H,DHX9,ADAR,VCP,PTBP1,KPNA4,AP1B1,CCNT1,PI4KB,ITGA5,P4HB,GRB2,VDAC1,SLC20A1,RAD23A,DERL1,IFITM2,C14ORF166,SHC1,HLA-DRA,PSMB3,POLR2H,SLC25A5,C1QBP,HSP90AB1,PSMB7,AP1G1,BCL2L1,SMU1,GPS2,PSMB2,NUP153,TNIP1,HSP90AA1,EIF3F,EIF4H,DDB1,PHB,HIPK2,PFN1,UBR4,CHMP4B,TNFRSF1A,EIF3D,STAT3,SYK,RPL8,EIF3A,PPP1CA,ANPEP,LDLR,RAE1,ARF1,UBXN1,ZC3HAV1,CD81,SKP2,EIF3M,NUP…
GO:BP	establishment of localization in cell	GO:0051649	0.012148	1791549427409961	2779	629	191	18017	CHP1,PAFAH1B2,AP1M1,CTNNB1,EZR,FCGR2A,AP2M1,HLA-DRB1,PSMD11,NUP214,ATG3,ARMC8,DHX9,COPE,STOML2,VCP,LAMTOR1,TOMM40,NOLC1,RAF1,KPNA4,TFDP2,PTPN1,CAPZA1,QSOX1,KCNAB2,AP1B1,MYH9,ACTN4,SEC61A1,ATP6AP2,UQCRC2,SLC39A8,ARHGAP1,NUMB,TRAPPC1,DNM2,DERL1,SNRPD3,PGAM1,ZDHHC3,NDEL1,TIMM23,SREBF2,GSTP1,PSAP,RAB5C,RNASE2,PHPT1,CORO1C,ATP2B4,FLOT2,HSP90AB1,TXNIP,YWHAH,PSMB7,HTRA2,AP1G1,RAB35,CDC37,SIRPA,TRAPPC10,…
GO:BP	regulation of metabolic process	GO:0019222	0.0203266	1.76919e+16	7248	629	370	18017	BAZ2A,CHP1,PAFAH1B2,CTNNB1,EZR,ECD,INPP5D,AP2M1,CASP3,HLA-DRB1,MEPCE,PSMD11,HIPK3,NOP2,ORC1,NUP214,PUM2,EHMT2,SIN3A,SUPT5H,DHX9,PPP4C,ADAR,USP22,CHCHD2,GATA1,STOML2,VCP,KLF13,PTBP1,TRAF7,CXXC5,HBP1,LAMTOR1,NOLC1,RAF1,MTPN,TFDP2,CDK4,DDA1,PTPN1,GPX1,PFDN5,QSOX1,NAMPT,DCPS,CCNT1,RTF1,ZNFX1,MYH9,CTDSP1,GNAQ,LIMK1,ITGA5,NFIC,ACTN4,GRB2,VDAC1,MYBL2,ATP6AP2,DRAP1,SLC39A8,ATF6,EIF3C,ACSL3,FXN,NUMB,OTUB1…
GO:BP	regulation of primary metabolic process	GO:0080090	0.00221493	1765463995790835	6191	629	331	18017	BAZ2A,CHP1,CTNNB1,EZR,ECD,CASP3,HLA-DRB1,MEPCE,PSMD11,HIPK3,NOP2,ORC1,NUP214,PUM2,EHMT2,SIN3A,SUPT5H,DHX9,PPP4C,ADAR,USP22,CHCHD2,GATA1,STOML2,VCP,KLF13,PTBP1,TRAF7,CXXC5,HBP1,LAMTOR1,NOLC1,RAF1,MTPN,TFDP2,CDK4,DDA1,PTPN1,GPX1,PFDN5,NAMPT,CCNT1,RTF1,ZNFX1,MYH9,CTDSP1,GNAQ,LIMK1,ITGA5,NFIC,ACTN4,GRB2,MYBL2,ATP6AP2,DRAP1,SLC39A8,ATF6,EIF3C,ACSL3,OTUB1,CCT3,DNM2,RAD23A,DERL1,C14ORF166,PRMT5,SHC1,THR…
GO:BP	positive regulation of cellular process	GO:0048522	0.0271676	1.75659e+16	5803	629	316	18017	CHP1,PAFAH1B2,CTNNB1,EZR,ECD,INPP5D,AP2M1,CASP3,HLA-DRB1,MEPCE,PSMD11,NOP2,PUM2,SIN3A,SUPT5H,DHX9,USP22,CHCHD2,GATA1,STOML2,VCP,KLF13,PDLIM7,PTBP1,TRAF7,CXXC5,LAMTOR1,NOLC1,RAF1,MTPN,TFDP2,CDK4,DDA1,PTPN1,GPX1,NAMPT,CCNT1,RTF1,MYH9,LIMK1,ITGA5,NFIC,P4HB,ACTN4,GRB2,MYBL2,PLEKHM1,ATP6AP2,SLC20A1,ATF6,EIF3C,ACSL3,FXN,NUMB,CAPNS1,CCT3,DNM2,RAD23A,DERL1,GLUL,C14ORF166,PRMT5,SHC1,THRAP3,ARID2,RARA,PSMB…
GO:BP	symbiotic process	GO:0044403	0.00550105	1.72596e+16	986	629	98	18017	AP1M1,CTNNB1,AP2M1,HLA-DRB1,NUP214,SEPT6,SUPT5H,DHX9,ADAR,VCP,PTBP1,KPNA4,GPX1,AP1B1,CCNT1,PI4KB,ITGA5,P4HB,GRB2,VDAC1,SLC20A1,RAD23A,DERL1,IFITM2,C14ORF166,SHC1,HLA-DRA,PSMB3,POLR2H,SLC25A5,C1QBP,HSP90AB1,PSMB7,AP1G1,BCL2L1,SMU1,GPS2,PSMB2,NUP153,TNIP1,HSP90AA1,EIF3F,EIF4H,DDB1,PHB,HIPK2,PFN1,UBR4,CHMP4B,TNFRSF1A,EIF3D,STAT3,SYK,RPL8,EIF3A,PPP1CA,ANPEP,LDLR,RAE1,ARF1,UBXN1,ZC3HAV1,CD81,SKP2,EIF3…
GO:BP	regulation of catabolic process	GO:0009894	0.00728205	1.71377e+16	1041	629	101	18017	PAFAH1B2,EZR,CASP3,PSMD11,NUP214,PUM2,EHMT2,SUPT5H,DHX9,VCP,LAMTOR1,CDK4,DDA1,PTPN1,GPX1,QSOX1,NAMPT,VDAC1,CAPNS1,RAD23A,THRAP3,PSMB3,PGAM1,ATP6V1B2,SREBF2,PSAP,PSME1,ATP2B4,HSP90AB1,PSMB7,HTRA2,CDC37,TIPARP,PSMB2,CAPN1,CST3,NUP153,PSMF1,HSP90AA1,BAG6,USP36,ARNT,DDB1,KHSRP,CTSC,PHB,MYD88,HIPK2,CHMP4B,ZFAND2A,STAT3,YBX1,ODC1,NAF1,EDEM1,PPP1CA,LDLR,RAE1,XBP1,UBE2G2,PSMC5,UBXN1,EXOSC1,PSMD7,ZC3HAV1,…
GO:BP	regulation of nitrogen compound metabolic process	GO:0051171	0.00863567	1.70637e+16	5999	629	322	18017	BAZ2A,CHP1,CTNNB1,EZR,ECD,CASP3,HLA-DRB1,MEPCE,PSMD11,HIPK3,NOP2,ORC1,NUP214,PUM2,EHMT2,SIN3A,SUPT5H,DHX9,PPP4C,ADAR,USP22,CHCHD2,GATA1,VCP,KLF13,PTBP1,TRAF7,CXXC5,HBP1,LAMTOR1,NOLC1,RAF1,MTPN,TFDP2,CDK4,DDA1,PTPN1,GPX1,PFDN5,NAMPT,CCNT1,RTF1,ZNFX1,MYH9,CTDSP1,GNAQ,LIMK1,ITGA5,NFIC,ACTN4,GRB2,MYBL2,ATP6AP2,DRAP1,SLC39A8,ATF6,EIF3C,ACSL3,OTUB1,CCT3,DNM2,RAD23A,DERL1,C14ORF166,PRMT5,SHC1,THRAP3,ZNF…
GO:BP	regulation of macromolecule metabolic process	GO:0060255	0.130576	1688413636222209	6709	629	348	18017	BAZ2A,CHP1,CTNNB1,EZR,ECD,INPP5D,AP2M1,CASP3,HLA-DRB1,MEPCE,PSMD11,HIPK3,NOP2,ORC1,NUP214,PUM2,EHMT2,SIN3A,SUPT5H,DHX9,PPP4C,ADAR,USP22,CHCHD2,GATA1,STOML2,VCP,KLF13,PTBP1,TRAF7,CXXC5,HBP1,LAMTOR1,NOLC1,RAF1,MTPN,TFDP2,CDK4,DDA1,PTPN1,GPX1,PFDN5,NAMPT,DCPS,CCNT1,RTF1,ZNFX1,MYH9,CTDSP1,GNAQ,LIMK1,ITGA5,NFIC,ACTN4,GRB2,MYBL2,ATP6AP2,DRAP1,SLC39A8,ATF6,EIF3C,NUMB,OTUB1,CCT3,DNM2,RAD23A,DERL1,C14ORF1…
GO:BP	regulation of cellular catabolic process	GO:0031329	0.0134148	1687241532747458	881	629	91	18017	PAFAH1B2,EZR,CASP3,PSMD11,NUP214,PUM2,EHMT2,SUPT5H,DHX9,VCP,LAMTOR1,DDA1,PTPN1,GPX1,QSOX1,NAMPT,VDAC1,CAPNS1,RAD23A,THRAP3,PSMB3,PGAM1,ATP6V1B2,SREBF2,PSAP,PSME1,ATP2B4,HSP90AB1,PSMB7,HTRA2,CDC37,PSMB2,CAPN1,CST3,PSMF1,HSP90AA1,BAG6,USP36,ARNT,KHSRP,CTSC,MYD88,HIPK2,CHMP4B,ZFAND2A,STAT3,YBX1,NAF1,EDEM1,PPP1CA,LDLR,XBP1,UBE2G2,PSMC5,UBXN1,EXOSC1,PSMD7,ZC3HAV1,CD81,RHEB,FOXO3,IGF2BP2,PIM2,MCL1,TIMP…
GO:BP	cellular catabolic process	GO:0044248	0.0282276	165493268051509	2338	629	167	18017	CHP1,PAFAH1B2,CTNNB1,EZR,AP2M1,CASP3,PSMD11,NUP214,ATG3,PUM2,EHMT2,SUPT5H,ARMC8,DHX9,USP22,VCP,LAMTOR1,TOMM40,DDA1,PTPN1,GPX1,QSOX1,TPP1,NAMPT,DCPS,VDAC1,PLEKHM1,NT5C2,CAPNS1,HADHA,RAD23A,DERL1,GLUL,THRAP3,PSMB3,PGAM1,ATP6V1B2,SREBF2,FAH,PCBD1,PSAP,RNASE2,PSME1,VMP1,BUB3,ATP2B4,HSP90AB1,PSMB7,HTRA2,CDC37,SHMT2,BCKDK,GABARAP,PCNP,MAP1LC3B2,CLTC,ABHD2,PSMB2,CAPN1,CST3,ZNRF1,PSMF1,DCXR,HSP90AA1,BAG6…
GO:BP	cellular localization	GO:0051641	0.0648883	1.61878e+16	3487	629	218	18017	CHP1,PAFAH1B2,AP1M1,CTNNB1,EZR,FCGR2A,AP2M1,HLA-DRB1,MEPCE,PSMD11,NUP214,ATG3,SIN3A,SEPT6,ARMC8,DHX9,COPE,STOML2,VCP,LAMTOR1,TOMM40,NOLC1,RAF1,KPNA4,TFDP2,PTPN1,CAPZA1,QSOX1,TPP1,KCNAB2,AP1B1,MYH9,ACTN4,SEC61A1,BSG,PLEKHM1,ATP6AP2,UQCRC2,SLC39A8,ARHGAP1,ACSL3,NUMB,TRAPPC1,CCT3,DNM2,DERL1,GLUL,SNRPD3,PGAM1,ZDHHC3,NDEL1,TIMM23,SREBF2,GSTP1,PSAP,RAB5C,RNASE2,PHPT1,RPA1,BUB3,CORO1C,ATP2B4,FLOT2,HSP90…
GO:BP	positive regulation of biological process	GO:0048518	0.0674034	1.61713e+16	6416	629	335	18017	CHP1,PAFAH1B2,CTNNB1,EZR,FCGR2A,ECD,INPP5D,AP2M1,CASP3,HLA-DRB1,MEPCE,PSMD11,NOP2,PUM2,SIN3A,SUPT5H,DHX9,ADAR,USP22,CHCHD2,GATA1,STOML2,VCP,KLF13,PDLIM7,PTBP1,TRAF7,CXXC5,LAMTOR1,NOLC1,RAF1,MTPN,TFDP2,CDK4,DDA1,PTPN1,GPX1,NAMPT,CCNT1,RTF1,MYH9,LIMK1,ITGA5,NFIC,P4HB,ACTN4,GRB2,MYBL2,PLEKHM1,ATP6AP2,SLC20A1,ATF6,EIF3C,ACSL3,FXN,NUMB,CAPNS1,CCT3,DNM2,RAD23A,DERL1,GLUL,C14ORF166,PRMT5,SHC1,THRAP3,ARI…
GO:BP	interspecies interaction between organisms	GO:0044419	1.82811	1.5738e+16	2254	629	161	18017	AP1M1,CTNNB1,AP2M1,CASP3,HLA-DRB1,PSMD11,NUP214,PUM2,SIN3A,SEPT6,SUPT5H,DHX9,ADAR,VCP,PTBP1,RAF1,KPNA4,CDK4,PTPN1,GPX1,CAPZA1,AP1B1,CCNT1,PI4KB,ITGA5,P4HB,GRB2,SEC61A1,VDAC1,SLC20A1,RAD23A,DERL1,IFITM2,C14ORF166,SHC1,RARA,HLA-DRA,PSMB3,POLR2H,GSTP1,SLC25A5,RNASE2,DDX41,C1QBP,PSME1,HSP90AB1,TTLL12,PSMB7,AP1G1,BCL2L1,CDC37,SIRPA,SHMT2,SMU1,IRF9,JAK1,GPS2,PSMB2,NUP153,TNIP1,PSMF1,HSP90AA1,EIF3F,CYBA…
GO:BP	catabolic process	GO:0009056	0.361125	1.54423e+16	2721	629	182	18017	CHP1,PAFAH1B2,CTNNB1,EZR,AP2M1,CASP3,PSMD11,NUP214,ATG3,PUM2,EHMT2,SUPT5H,ARMC8,DHX9,USP22,VCP,LAMTOR1,TOMM40,CDK4,DDA1,PTPN1,GPX1,QSOX1,TPP1,NAMPT,DCPS,VDAC1,PLEKHM1,NT5C2,CAPNS1,HADHA,RAD23A,DERL1,GLUL,THRAP3,PSMB3,PGAM1,ATP6V1B2,SREBF2,FAH,PCBD1,PSAP,RNASE2,PSME1,VMP1,BUB3,ATP2B4,HSP90AB1,YWHAH,PSMB7,HTRA2,CDC37,SHMT2,BCKDK,TIPARP,GABARAP,PCNP,MAP1LC3B2,CLTC,ABHD2,PSMB2,CAPN1,CST3,NUP153,CTSD,…
GO:BP	macromolecule catabolic process	GO:0009057	15.8783	1479919645864328	1455	629	119	18017	CHP1,CTNNB1,EZR,AP2M1,CASP3,PSMD11,NUP214,PUM2,ARMC8,DHX9,USP22,VCP,DDA1,PTPN1,GPX1,TPP1,DCPS,RAD23A,DERL1,THRAP3,PSMB3,PSAP,RNASE2,PSME1,BUB3,HSP90AB1,PSMB7,HTRA2,TIPARP,PCNP,CLTC,PSMB2,CAPN1,CST3,CTSD,ZNRF1,PSMF1,HSP90AA1,BAG6,CTSZ,USP36,DDB1,KHSRP,CTSC,DROSHA,PHB,MYD88,HIPK2,UBR4,CHMP4B,ZFAND2A,KCTD10,RNF130,YBX1,ODC1,RPL8,ANAPC16,NAF1,EDEM1,PPP1CA,LDLR,XBP1,UBE2G2,PSMC5,EIF3E,UBXN1,PRPF19,EXO…
GO:BP	cellular protein metabolic process	GO:0044267	16.3925	1.47854e+16	5424	629	293	18017	BAZ2A,CHP1,CTNNB1,EZR,TPP2,AP2M1,CASP3,HLA-DRB1,PSMD11,HIPK3,NUP214,ATG3,MRPL38,PUM2,EHMT2,SIN3A,ARMC8,DHX9,PPP4C,ADAR,USP22,GATA1,STOML2,VCP,PTBP1,TRAF7,LAMTOR1,NOLC1,RAF1,MTPN,CDK4,DDA1,PTPN1,GPX1,QSOX1,PTPRE,CCNT1,RTF1,MYH9,CTDSP1,GNAQ,LIMK1,ITGA5,P4HB,GRB2,ATP6AP2,UQCRC2,SLC39A8,EIF3C,FXN,OTUB1,RAD23A,DERL1,GLUL,C14ORF166,PRMT5,SHC1,SNRPD3,RPN2,RARA,PSMB3,ZDHHC3,PPIF,GSTP1,PSAP,BMPR2,C1QBP,EI…
GO:BP	cellular response to stress	GO:0033554	24.0487	1.46189e+16	2124	629	152	18017	CTNNB1,EZR,CASP3,PSMD11,HIPK3,NUP214,EHMT2,SIN3A,DHX9,PPP4C,CHCHD2,STOML2,VCP,SMC1A,TFDP2,PTPN1,GPX1,TPP1,NAMPT,P4HB,GRB2,LIG1,ATF6,FXN,OTUB1,DNM2,RAD23A,DERL1,GLUL,SHC1,PDS5A,POLD2,ARID2,SIGMAR1,PSMB3,NDEL1,POLR2H,PPIF,SREBF2,GSTP1,PSAP,BMPR2,EIF4EBP1,PSME1,AKR1B1,GPS1,FEM1B,RPA1,PRMT1,ADNP2,HSP90AB1,RGCC,PSMB7,CERS2,HTRA2,BCL2L1,CDC37,SIRPA,RBM4,GABARAP,MAP1LC3B2,GPS2,PSMB2,NUP153,GNB1,PSMF1,HS…
GO:BP	primary metabolic process	GO:0044238	45.0668	1.33461e+16	10670	629	472	18017	BAZ2A,CHP1,PAFAH1B2,CTNNB1,EZR,TPP2,ECD,INPP5D,AP2M1,CASP3,HLA-DRB1,MEPCE,PSMD11,HIPK3,NOP2,ORC1,NUP214,ATG3,MRPL38,PUM2,EHMT2,SIN3A,SUPT5H,ARMC8,DHX9,PPP4C,ADAR,USP22,CHCHD2,GATA1,STOML2,VCP,KLF13,PTBP1,SMC1A,TRAF7,CXXC5,HBP1,LAMTOR1,NOLC1,RAF1,MTPN,TFDP2,CDK4,DDA1,PTPN1,GPX1,PFDN5,QSOX1,TPP1,NAMPT,PTPRE,DCPS,CCNT1,HDLBP,PI4KB,RTF1,ZNFX1,MYH9,CTDSP1,GNAQ,LIMK1,ITGA5,NFIC,P4HB,ACTN4,GRB2,MYBL2,NT…
GO:BP	cellular macromolecule catabolic process	GO:0044265	68.5522	1.3164e+16	1221	629	103	18017	CTNNB1,EZR,AP2M1,CASP3,PSMD11,NUP214,PUM2,ARMC8,DHX9,USP22,VCP,DDA1,GPX1,DCPS,RAD23A,DERL1,THRAP3,PSMB3,PSAP,RNASE2,PSME1,BUB3,HSP90AB1,PSMB7,HTRA2,PCNP,CLTC,PSMB2,CST3,ZNRF1,PSMF1,HSP90AA1,BAG6,CTSZ,USP36,DDB1,KHSRP,CTSC,DROSHA,MYD88,HIPK2,UBR4,CHMP4B,ZFAND2A,KCTD10,RNF130,YBX1,RPL8,ANAPC16,NAF1,EDEM1,LDLR,XBP1,UBE2G2,PSMC5,EIF3E,UBXN1,PRPF19,EXOSC1,PSMD7,ZC3HAV1,CD81,SKP2,IGF2BP2,FBXW11,RBM8A,H…
GO:BP	cellular nitrogen compound metabolic process	GO:0034641	91.548	1.30384e+16	6496	629	328	18017	BAZ2A,CHP1,CTNNB1,EZR,ECD,CASP3,HLA-DRB1,MEPCE,PSMD11,HIPK3,NOP2,ORC1,NUP214,MRPL38,PUM2,EHMT2,SIN3A,SUPT5H,DHX9,PPP4C,ADAR,USP22,CHCHD2,GATA1,STOML2,VCP,KLF13,PTBP1,SMC1A,CXXC5,HBP1,NOLC1,RAF1,MTPN,TFDP2,CDK4,GPX1,PFDN5,TPP1,NAMPT,DCPS,CCNT1,RTF1,ZNFX1,CTDSP1,NFIC,ACTN4,MYBL2,NT5C2,ATP6AP2,DDX24,LIG1,DRAP1,SLC39A8,SLC25A39,ATF6,EIF3C,ACSL3,FXN,OTUB1,CCT3,DNM2,RAD23A,C14ORF166,PRMT5,SHC1,THRAP3,S…
GO:BP	regulation of protein metabolic process	GO:0051246	1087.51	1.29636e+16	2917	629	184	18017	CHP1,CTNNB1,EZR,CASP3,HLA-DRB1,HIPK3,PUM2,EHMT2,SIN3A,DHX9,ADAR,GATA1,VCP,PTBP1,TRAF7,LAMTOR1,NOLC1,RAF1,MTPN,CDK4,DDA1,PTPN1,GPX1,CCNT1,RTF1,MYH9,CTDSP1,GNAQ,LIMK1,ITGA5,GRB2,ATP6AP2,EIF3C,OTUB1,RAD23A,DERL1,C14ORF166,PRMT5,SHC1,RARA,GSTP1,PSAP,BMPR2,C1QBP,EIF4EBP1,PSME1,CCND2,GPS1,FEM1B,PRMT1,CORO1C,ATP2B4,FLOT2,HSP90AB1,RGCC,HTRA2,ANKLE2,CDC37,SIRPA,SHMT2,RBM4,WBP2,TIPARP,GPS2,STRADB,CST3,CTSD…
GO:BP	protein metabolic process	GO:0019538	1122.67	1.29497e+16	5996	629	309	18017	BAZ2A,CHP1,CTNNB1,EZR,TPP2,AP2M1,CASP3,HLA-DRB1,PSMD11,HIPK3,NUP214,ATG3,MRPL38,PUM2,EHMT2,SIN3A,ARMC8,DHX9,PPP4C,ADAR,USP22,GATA1,STOML2,VCP,PTBP1,TRAF7,LAMTOR1,NOLC1,RAF1,MTPN,CDK4,DDA1,PTPN1,GPX1,QSOX1,TPP1,PTPRE,CCNT1,RTF1,MYH9,CTDSP1,GNAQ,LIMK1,ITGA5,P4HB,GRB2,ATP6AP2,UQCRC2,SLC39A8,EIF3C,FXN,OTUB1,CAPNS1,RAD23A,DERL1,GLUL,C14ORF166,PRMT5,SHC1,SNRPD3,RPN2,RARA,PSMB3,ZDHHC3,NDEL1,PPIF,GSTP1,P…
GO:BP	organic substance catabolic process	GO:1901575	1205.29	1.29189e+16	2259	629	154	18017	CHP1,PAFAH1B2,CTNNB1,EZR,AP2M1,CASP3,PSMD11,NUP214,PUM2,ARMC8,DHX9,USP22,VCP,CDK4,DDA1,PTPN1,GPX1,TPP1,DCPS,NT5C2,HADHA,RAD23A,DERL1,GLUL,THRAP3,PSMB3,PGAM1,FAH,PCBD1,PSAP,RNASE2,PSME1,BUB3,ATP2B4,HSP90AB1,YWHAH,PSMB7,HTRA2,SHMT2,BCKDK,TIPARP,PCNP,CLTC,ABHD2,PSMB2,CAPN1,CST3,NUP153,CTSD,ZNRF1,PSMF1,DCXR,HSP90AA1,BAG6,CTSZ,USP36,ARNT,DDB1,KHSRP,CTSC,DROSHA,PHB,MYD88,HIPK2,UBR4,CHMP4B,ZFAND2A,STAT3…
GO:BP	leukocyte degranulation	GO:0043299	2093.58	1.26791e+16	537	629	62	18017	PAFAH1B2,AP1M1,FCGR2A,PSMD11,ARMC8,VCP,LAMTOR1,QSOX1,KCNAB2,ATP6AP2,TRAPPC1,PGAM1,GSTP1,PSAP,RAB5C,RNASE2,HSP90AB1,PSMB7,AP1G1,SIRPA,CAPN1,CST3,CTSD,HSP90AA1,CYBA,CTSZ,CTSC,CMTM6,BIN2,UBR4,ARL8A,SYK,GGH,GRN,FGR,ANPEP,TYROBP,CORO1A,PDPK1,ITGB2,PSMD7,RAC2,DIAPH1,CDK13,VAPA,GATA2,TIMP2,SURF4,PSMD13,PTPN6,TNFRSF1B,GM2A,GDI2,IST1,NCSTN,PA2G4,CTSA,ILF2,APRT,PSMD2,NEU1,SERPINB1
GO:BP	cellular macromolecule metabolic process	GO:0044260	235.736	1.26276e+16	8467	629	397	18017	BAZ2A,CHP1,CTNNB1,EZR,TPP2,ECD,AP2M1,CASP3,HLA-DRB1,MEPCE,PSMD11,HIPK3,NOP2,ORC1,NUP214,ATG3,MRPL38,PUM2,EHMT2,SIN3A,SUPT5H,ARMC8,DHX9,PPP4C,ADAR,USP22,CHCHD2,GATA1,STOML2,VCP,KLF13,PTBP1,SMC1A,TRAF7,CXXC5,HBP1,LAMTOR1,NOLC1,RAF1,MTPN,TFDP2,CDK4,DDA1,PTPN1,GPX1,PFDN5,QSOX1,NAMPT,PTPRE,DCPS,CCNT1,RTF1,ZNFX1,MYH9,CTDSP1,GNAQ,LIMK1,ITGA5,NFIC,P4HB,GRB2,MYBL2,ATP6AP2,LIG1,UQCRC2,DRAP1,SLC39A8,ATF6,EI…
GO:BP	response to stress	GO:0006950	241.997	1.26162e+16	4190	629	237	18017	CTNNB1,EZR,CASP3,HLA-DRB1,PSMD11,HIPK3,NUP214,PUM2,EHMT2,SIN3A,DHX9,PPP4C,ADAR,CHCHD2,GATA1,STOML2,VCP,SMC1A,NOLC1,RAF1,KPNA4,TFDP2,CDK4,PTPN1,GPX1,CAPZA1,TPP1,NAMPT,MYH9,GNAQ,ITGA5,P4HB,ACTN4,GRB2,SEC61A1,VDAC1,LIG1,ATF6,FXN,OTUB1,DNM2,RAD23A,DERL1,GLUL,IFITM2,SHC1,PDS5A,POLD2,ARID2,SIGMAR1,HLA-DRA,PSMB3,NDEL1,POLR2H,FIBP,PPIF,SREBF2,GSTP1,PSAP,RNASE2,BMPR2,DDX41,C1QBP,EIF4EBP1,PSME1,AKR1B1,GPS1…
GO:BP	metabolic process	GO:0008152	609.89	1.22147e+16	11952	629	508	18017	BAZ2A,CHP1,PAFAH1B2,CTNNB1,EZR,TPP2,ECD,INPP5D,AP2M1,CASP3,HLA-DRB1,MEPCE,PSMD11,HIPK3,NOP2,ORC1,NUP214,ATG3,MRPL38,PUM2,EHMT2,SIN3A,SUPT5H,ARMC8,DHX9,PPP4C,ADAR,USP22,CHCHD2,GATA1,STOML2,VCP,KLF13,PTBP1,SMC1A,TRAF7,CXXC5,HBP1,LAMTOR1,TOMM40,NOLC1,RAF1,MTPN,TFDP2,CDK4,DDA1,PTPN1,GPX1,PFDN5,QSOX1,TPP1,NAMPT,PTPRE,KCNAB2,DCPS,CCNT1,HDLBP,PI4KB,RTF1,ZNFX1,MYH9,CTDSP1,GNAQ,LIMK1,ITGA5,NFIC,P4HB,ACTN4…
GO:BP	negative regulation of metabolic process	GO:0009892	681.133	1.21668e+16	3456	629	205	18017	BAZ2A,CHP1,CTNNB1,EZR,INPP5D,CASP3,HLA-DRB1,MEPCE,PSMD11,HIPK3,NUP214,PUM2,EHMT2,SIN3A,SUPT5H,DHX9,ADAR,GATA1,PTBP1,CXXC5,HBP1,RAF1,TFDP2,PTPN1,GPX1,PFDN5,QSOX1,NAMPT,DCPS,CCNT1,RTF1,ZNFX1,CTDSP1,GNAQ,LIMK1,NFIC,VDAC1,DRAP1,OTUB1,C14ORF166,PRMT5,SHC1,THRAP3,PDS5A,RARA,PSMB3,POLR2H,PPIF,SREBF2,GSTP1,BMPR2,C1QBP,EIF4EBP1,PSME1,IKZF5,GPS1,GATAD2B,DPF2,CORO1C,ATP2B4,FLOT2,HSP90AB1,TXNIP,RGCC,PSMB7,HT…
GO:BP	cellular component organization or biogenesis	GO:0071840	709.746	1.21489e+16	6686	629	332	18017	BAZ2A,CHP1,AP1M1,CTNNB1,EZR,AP2M1,CASP3,HLA-DRB1,PSMD11,NOP2,NUP214,ATG3,MRPL38,PUM2,EHMT2,SIN3A,SEPT6,DHX9,ADAR,USP22,CHCHD2,GATA1,STOML2,VCP,PDLIM7,SMC1A,TRAF7,LAMTOR1,TOMM40,NOLC1,RAF1,MTPN,TFDP2,CDK4,PTPN1,GPX1,CAPZA1,QSOX1,TPP1,RTF1,ZNFX1,MYH9,LIMK1,ITGA5,P4HB,ACTN4,GRB2,SEC61A1,TSPYL1,VDAC1,BSG,MYBL2,PLEKHM1,ATP6AP2,UQCRC2,SLC39A8,EIF3C,ACSL3,CHCHD3,FXN,NUMB,OTUB1,TRAPPC1,CAPNS1,ATPAF1,CCT3…
GO:BP	nitrogen compound metabolic process	GO:0006807	730.993	1213608662486521	10163	629	452	18017	BAZ2A,CHP1,CTNNB1,EZR,TPP2,ECD,AP2M1,CASP3,HLA-DRB1,MEPCE,PSMD11,HIPK3,NOP2,ORC1,NUP214,ATG3,MRPL38,PUM2,EHMT2,SIN3A,SUPT5H,ARMC8,DHX9,PPP4C,ADAR,USP22,CHCHD2,GATA1,STOML2,VCP,KLF13,PTBP1,SMC1A,TRAF7,CXXC5,HBP1,LAMTOR1,NOLC1,RAF1,MTPN,TFDP2,CDK4,DDA1,PTPN1,GPX1,PFDN5,QSOX1,TPP1,NAMPT,PTPRE,DCPS,CCNT1,RTF1,ZNFX1,MYH9,CTDSP1,GNAQ,LIMK1,ITGA5,NFIC,P4HB,ACTN4,GRB2,MYBL2,NT5C2,ATP6AP2,DDX24,LIG1,UQCRC…
GO:BP	cellular protein localization	GO:0034613	733.063	1.21349e+16	1985	629	139	18017	CHP1,AP1M1,CTNNB1,EZR,AP2M1,MEPCE,NUP214,ATG3,SIN3A,SEPT6,DHX9,VCP,LAMTOR1,TOMM40,NOLC1,KPNA4,TFDP2,PTPN1,TPP1,KCNAB2,AP1B1,SEC61A1,BSG,UQCRC2,ACSL3,NUMB,CCT3,DNM2,DERL1,GLUL,ZDHHC3,NDEL1,TIMM23,SREBF2,PSAP,RAB5C,RPA1,BUB3,ATP2B4,FLOT2,HSP90AB1,TXNIP,YWHAH,HTRA2,AP1G1,RAB35,BCL2L1,CDC37,TBC1D9B,GABARAP,CLTC,SUPT7L,SRSF9,STRADB,NUP153,HSP90AA1,BAG6,TNPO3,RBM22,USP36,BRAF,SRSF6,ACTB,ANKRD13A,YWHAQ,…
GO:BP	cell activation	GO:0001775	759.265	1.21196e+16	1497	629	115	18017	PAFAH1B2,AP1M1,CTNNB1,FCGR2A,INPP5D,CASP3,HLA-DRB1,PSMD11,ARMC8,GATA1,STOML2,VCP,LAMTOR1,RAF1,QSOX1,NAMPT,KCNAB2,MYH9,GNAQ,GRB2,ATP6AP2,TRAPPC1,PRMT5,RARA,PGAM1,FIBP,GSTP1,PSAP,RAB5C,RNASE2,FLOT2,HSP90AB1,RGCC,PSMB7,AP1G1,SIRPA,GPS2,CAPN1,CST3,MDK,CTSD,GNB1,KLF6,HSP90AA1,SOX12,BAG6,CYBA,CTSZ,GNA13,BRAF,ACTB,ILK,CTSC,CMTM6,BIN2,DROSHA,PHB,MYD88,UBR4,FOXP1,STAT3,ARL8A,SYK,GGH,FKBP1A,GRN,FGR,HLA-DPA…
GO:BP	intracellular transport	GO:0046907	864.42	1206327503758127	1761	629	128	18017	CHP1,AP1M1,EZR,AP2M1,NUP214,ATG3,DHX9,COPE,STOML2,VCP,LAMTOR1,TOMM40,NOLC1,KPNA4,TFDP2,PTPN1,CAPZA1,AP1B1,ACTN4,SEC61A1,UQCRC2,ARHGAP1,TRAPPC1,DERL1,SNRPD3,ZDHHC3,NDEL1,TIMM23,SREBF2,PSAP,RAB5C,CORO1C,FLOT2,HSP90AB1,TXNIP,YWHAH,HTRA2,AP1G1,RAB35,CDC37,TRAPPC10,RBM4,TBC1D9B,GABARAP,CLTC,SRSF9,ERGIC3,STRADB,NUP153,HSP90AA1,TNPO3,RBM22,CTSZ,USP36,SRSF6,CTSC,CMTM6,YWHAQ,DDX39A,CHMP4B,SRSF1,STAT3,ARL6…
GO:BP	cellular macromolecule localization	GO:0070727	11602.7	1193544009030744	1996	629	139	18017	CHP1,AP1M1,CTNNB1,EZR,AP2M1,MEPCE,NUP214,ATG3,SIN3A,SEPT6,DHX9,VCP,LAMTOR1,TOMM40,NOLC1,KPNA4,TFDP2,PTPN1,TPP1,KCNAB2,AP1B1,SEC61A1,BSG,UQCRC2,ACSL3,NUMB,CCT3,DNM2,DERL1,GLUL,ZDHHC3,NDEL1,TIMM23,SREBF2,PSAP,RAB5C,RPA1,BUB3,ATP2B4,FLOT2,HSP90AB1,TXNIP,YWHAH,HTRA2,AP1G1,RAB35,BCL2L1,CDC37,TBC1D9B,GABARAP,CLTC,SUPT7L,SRSF9,STRADB,NUP153,HSP90AA1,BAG6,TNPO3,RBM22,USP36,BRAF,SRSF6,ACTB,ANKRD13A,YWHAQ,…
GO:BP	mRNA metabolic process	GO:0016071	12852.7	118910050686454	872	629	81	18017	ECD,PSMD11,HIPK3,NUP214,PUM2,SUPT5H,DHX9,ADAR,PTBP1,DCPS,CCNT1,PRMT5,THRAP3,SNRPD3,PSMB3,POLR2H,DDX41,C1QBP,PSME1,PRPF38B,SNRPA,PSMB7,SMU1,RBM4,AAR2,PSMB2,SRSF9,PABPC3,PSMF1,RBM22,SRSF6,KHSRP,MYD88,DDX39A,SRSF1,STAT3,YBX1,KHDRBS1,RPL8,RPRD2,ATF4,PSMC5,STRAP,EIF3E,RALY,PRPF19,EXOSC1,SRRM2,PSMD7,ZC3HAV1,FLNA,NUP98,IGF2BP2,RBM8A,SLBP,CDK13,RPS18,SF3A1,POLR2G,RPS5,PSMB4,PSMD13,CPSF6,RPL3,SNRPA1,SAMD4…
GO:BP	regulation of cellular protein metabolic process	GO:0032268	13634.4	1.18654e+16	2763	629	174	18017	CHP1,CTNNB1,EZR,CASP3,HLA-DRB1,HIPK3,PUM2,EHMT2,SIN3A,DHX9,ADAR,GATA1,VCP,PTBP1,TRAF7,LAMTOR1,NOLC1,RAF1,MTPN,CDK4,DDA1,PTPN1,GPX1,CCNT1,RTF1,MYH9,CTDSP1,GNAQ,LIMK1,ITGA5,GRB2,ATP6AP2,EIF3C,OTUB1,RAD23A,DERL1,C14ORF166,PRMT5,SHC1,RARA,GSTP1,PSAP,BMPR2,C1QBP,EIF4EBP1,PSME1,CCND2,GPS1,FEM1B,PRMT1,CORO1C,ATP2B4,HSP90AB1,RGCC,HTRA2,ANKLE2,CDC37,SIRPA,SHMT2,RBM4,WBP2,GPS2,STRADB,CST3,CTSD,TNIP1,SYAP1,…
GO:BP	response to organic substance	GO:0010033	14629.6	1.18348e+16	3433	629	203	18017	CTNNB1,EZR,INPP5D,CASP3,HLA-DRB1,PSMD11,EHMT2,SIN3A,DHX9,ADAR,GATA1,VCP,PTBP1,LAMTOR1,RAF1,CDK4,PTPN1,CAPZA1,TPP1,NAMPT,PTPRE,DCPS,GNAQ,ITGA5,STIP1,P4HB,ACTN4,GRB2,SEC61A1,BSG,MYBL2,ATF6,ACSL3,OTUB1,DNM2,HADHA,DERL1,GLUL,IFITM2,PRMT5,SHC1,RARA,HLA-DRA,PSMB3,NDEL1,POLR2H,ATP6V1B2,FIBP,SREBF2,GSTP1,PSAP,SLC25A5,BMPR2,DDX41,EIF4EBP1,PSME1,AKR1B1,PHPT1,ATP2B4,ADNP2,HSP90AB1,TXNIP,YWHAH,TTLL12,PSMB7,H…
GO:BP	neutrophil degranulation	GO:0043312	16303.1	1178773002875826	484	629	57	18017	PAFAH1B2,AP1M1,FCGR2A,PSMD11,ARMC8,VCP,LAMTOR1,QSOX1,KCNAB2,ATP6AP2,TRAPPC1,PGAM1,GSTP1,PSAP,RAB5C,RNASE2,HSP90AB1,PSMB7,SIRPA,CAPN1,CST3,CTSD,HSP90AA1,CYBA,CTSZ,CTSC,CMTM6,BIN2,UBR4,ARL8A,SYK,GGH,GRN,FGR,ANPEP,TYROBP,ITGB2,PSMD7,DIAPH1,CDK13,VAPA,TIMP2,SURF4,PSMD13,PTPN6,TNFRSF1B,GM2A,GDI2,IST1,NCSTN,PA2G4,CTSA,ILF2,APRT,PSMD2,NEU1,SERPINB1
GO:BP	neutrophil activation	GO:0042119	1778.89	1.17499e+16	500	629	58	18017	PAFAH1B2,AP1M1,FCGR2A,PSMD11,ARMC8,VCP,LAMTOR1,QSOX1,KCNAB2,ATP6AP2,TRAPPC1,PGAM1,GSTP1,PSAP,RAB5C,RNASE2,HSP90AB1,PSMB7,SIRPA,CAPN1,CST3,CTSD,HSP90AA1,CYBA,CTSZ,CTSC,CMTM6,BIN2,UBR4,ARL8A,SYK,GGH,GRN,FGR,ANPEP,TYROBP,ITGB2,PSMD7,DIAPH1,CDK13,VAPA,TIMP2,SURF4,PSMD13,PTPN6,TNFRSF1B,GM2A,GDI2,IST1,PREX1,NCSTN,PA2G4,CTSA,ILF2,APRT,PSMD2,NEU1,SERPINB1
GO:BP	neutrophil activation involved in immune response	GO:0002283	2150.84	1.16674e+16	487	629	57	18017	PAFAH1B2,AP1M1,FCGR2A,PSMD11,ARMC8,VCP,LAMTOR1,QSOX1,KCNAB2,ATP6AP2,TRAPPC1,PGAM1,GSTP1,PSAP,RAB5C,RNASE2,HSP90AB1,PSMB7,SIRPA,CAPN1,CST3,CTSD,HSP90AA1,CYBA,CTSZ,CTSC,CMTM6,BIN2,UBR4,ARL8A,SYK,GGH,GRN,FGR,ANPEP,TYROBP,ITGB2,PSMD7,DIAPH1,CDK13,VAPA,TIMP2,SURF4,PSMD13,PTPN6,TNFRSF1B,GM2A,GDI2,IST1,NCSTN,PA2G4,CTSA,ILF2,APRT,PSMD2,NEU1,SERPINB1
GO:BP	positive regulation of cellular metabolic process	GO:0031325	23758.4	1.16242e+16	3472	629	204	18017	CHP1,PAFAH1B2,CTNNB1,EZR,ECD,AP2M1,CASP3,HLA-DRB1,MEPCE,SIN3A,SUPT5H,DHX9,USP22,CHCHD2,GATA1,STOML2,VCP,KLF13,PTBP1,TRAF7,LAMTOR1,NOLC1,RAF1,TFDP2,CDK4,DDA1,PTPN1,NAMPT,CCNT1,RTF1,MYH9,ITGA5,NFIC,ACTN4,GRB2,MYBL2,ATF6,EIF3C,ACSL3,CCT3,DNM2,RAD23A,DERL1,C14ORF166,SHC1,THRAP3,ARID2,RARA,PPRC1,SREBF2,GSTP1,PCBD1,PSAP,BMPR2,DDX41,C1QBP,PSME1,IKZF5,CCND2,DPF2,PRMT1,ATP2B4,HSP90AB1,YWHAH,RGCC,HTRA2,ANK…
GO:BP	negative regulation of biological process	GO:0048519	2376.08	1.16241e+16	5719	629	294	18017	BAZ2A,CHP1,CTNNB1,EZR,INPP5D,AP2M1,CASP3,HLA-DRB1,MEPCE,PSMD11,HIPK3,ORC1,NUP214,ATG3,PUM2,EHMT2,SIN3A,SUPT5H,DHX9,ADAR,GATA1,VCP,KLF13,PTBP1,CXXC5,HBP1,LAMTOR1,RAF1,MTPN,TFDP2,CDK4,PTPN1,GPX1,CAPZA1,PFDN5,QSOX1,NAMPT,PTPRE,DCPS,CCNT1,RTF1,ZNFX1,MYH9,CTDSP1,GNAQ,LIMK1,ITGA5,NFIC,ACTN4,GRB2,VDAC1,DRAP1,ARHGAP1,FXN,NUMB,OTUB1,DNM2,IFITM2,C14ORF166,PRMT5,SHC1,THRAP3,PDS5A,ARID2,RARA,PSMB3,POLR2H,PPI…
GO:BP	granulocyte activation	GO:0036230	3052.87	1.15153e+16	506	629	58	18017	PAFAH1B2,AP1M1,FCGR2A,PSMD11,ARMC8,VCP,LAMTOR1,QSOX1,KCNAB2,ATP6AP2,TRAPPC1,PGAM1,GSTP1,PSAP,RAB5C,RNASE2,HSP90AB1,PSMB7,SIRPA,CAPN1,CST3,CTSD,HSP90AA1,CYBA,CTSZ,CTSC,CMTM6,BIN2,UBR4,ARL8A,SYK,GGH,GRN,FGR,ANPEP,TYROBP,ITGB2,PSMD7,DIAPH1,CDK13,VAPA,TIMP2,SURF4,PSMD13,PTPN6,TNFRSF1B,GM2A,GDI2,IST1,PREX1,NCSTN,PA2G4,CTSA,ILF2,APRT,PSMD2,NEU1,SERPINB1
GO:BP	regulation of response to stress	GO:0080134	30561	1.15148e+16	1546	629	116	18017	CTNNB1,EZR,HLA-DRB1,PSMD11,HIPK3,NUP214,PUM2,SIN3A,DHX9,PPP4C,ADAR,CHCHD2,RAF1,PTPN1,GPX1,NAMPT,MYH9,P4HB,ATF6,OTUB1,ARID2,PSMB3,NDEL1,GSTP1,PSAP,C1QBP,PSME1,FEM1B,RPA1,PRMT1,ATP2B4,HSP90AB1,TTLL12,PSMB7,CERS2,HTRA2,AP1G1,BCL2L1,CDC37,SIRPA,JAK1,GPS2,PSMB2,MDK,NUP153,TNIP1,PSMF1,HSP90AA1,BAG6,PIK3AP1,IER5,CYBA,SERPINB2,BRAF,SRSF6,CTSC,DROSHA,MYD88,HIPK2,FOXP1,TNFRSF1A,STAT3,SPATA2,SYK,TXN,YBX1,GR…
GO:BP	leukocyte activation involved in immune response	GO:0002366	33218.4	1.14786e+16	715	629	71	18017	PAFAH1B2,AP1M1,FCGR2A,PSMD11,ARMC8,VCP,LAMTOR1,QSOX1,KCNAB2,ATP6AP2,TRAPPC1,RARA,PGAM1,GSTP1,PSAP,RAB5C,RNASE2,HSP90AB1,PSMB7,AP1G1,SIRPA,CAPN1,CST3,MDK,CTSD,HSP90AA1,CYBA,CTSZ,CTSC,CMTM6,BIN2,UBR4,FOXP1,STAT3,ARL8A,SYK,GGH,GRN,FGR,ANPEP,TYROBP,XBP1,CORO1A,PDPK1,ITGB2,PSMD7,RAC2,CD81,DIAPH1,CDK13,VAPA,GATA2,TIMP2,SURF4,RIPK2,PSMD13,PTPN6,TNFRSF1B,GM2A,GDI2,HSPD1,IST1,NCSTN,PA2G4,CTSA,ILF2,APRT,PT…
GO:BP	macromolecule metabolic process	GO:0043170	3845.43	1141505558025555	9868	629	440	18017	BAZ2A,CHP1,CTNNB1,EZR,TPP2,ECD,INPP5D,AP2M1,CASP3,HLA-DRB1,MEPCE,PSMD11,HIPK3,NOP2,ORC1,NUP214,ATG3,MRPL38,PUM2,EHMT2,SIN3A,SUPT5H,ARMC8,DHX9,PPP4C,ADAR,USP22,CHCHD2,GATA1,STOML2,VCP,KLF13,PTBP1,SMC1A,TRAF7,CXXC5,HBP1,LAMTOR1,NOLC1,RAF1,MTPN,TFDP2,CDK4,DDA1,PTPN1,GPX1,PFDN5,QSOX1,TPP1,NAMPT,PTPRE,DCPS,CCNT1,RTF1,ZNFX1,MYH9,CTDSP1,GNAQ,LIMK1,ITGA5,NFIC,P4HB,ACTN4,GRB2,MYBL2,ATP6AP2,DDX24,LIG1,UQCR…
GO:BP	cell activation involved in immune response	GO:0002263	44320.8	113533925694821	719	629	71	18017	PAFAH1B2,AP1M1,FCGR2A,PSMD11,ARMC8,VCP,LAMTOR1,QSOX1,KCNAB2,ATP6AP2,TRAPPC1,RARA,PGAM1,GSTP1,PSAP,RAB5C,RNASE2,HSP90AB1,PSMB7,AP1G1,SIRPA,CAPN1,CST3,MDK,CTSD,HSP90AA1,CYBA,CTSZ,CTSC,CMTM6,BIN2,UBR4,FOXP1,STAT3,ARL8A,SYK,GGH,GRN,FGR,ANPEP,TYROBP,XBP1,CORO1A,PDPK1,ITGB2,PSMD7,RAC2,CD81,DIAPH1,CDK13,VAPA,GATA2,TIMP2,SURF4,RIPK2,PSMD13,PTPN6,TNFRSF1B,GM2A,GDI2,HSPD1,IST1,NCSTN,PA2G4,CTSA,ILF2,APRT,PT…
GO:BP	neutrophil mediated immunity	GO:0002446	581.868	1.12352e+16	498	629	57	18017	PAFAH1B2,AP1M1,FCGR2A,PSMD11,ARMC8,VCP,LAMTOR1,QSOX1,KCNAB2,ATP6AP2,TRAPPC1,PGAM1,GSTP1,PSAP,RAB5C,RNASE2,HSP90AB1,PSMB7,SIRPA,CAPN1,CST3,CTSD,HSP90AA1,CYBA,CTSZ,CTSC,CMTM6,BIN2,UBR4,ARL8A,SYK,GGH,GRN,FGR,ANPEP,TYROBP,ITGB2,PSMD7,DIAPH1,CDK13,VAPA,TIMP2,SURF4,PSMD13,PTPN6,TNFRSF1B,GM2A,GDI2,IST1,NCSTN,PA2G4,CTSA,ILF2,APRT,PSMD2,NEU1,SERPINB1
GO:BP	protein localization	GO:0008104	70315.4	1.11529e+16	2856	629	176	18017	CHP1,AP1M1,CTNNB1,EZR,AP2M1,HLA-DRB1,MEPCE,NUP214,ATG3,SIN3A,SEPT6,DHX9,COPE,VCP,LAMTOR1,TOMM40,NOLC1,RAF1,KPNA4,TFDP2,PTPN1,TPP1,KCNAB2,AP1B1,MYH9,ACTN4,SEC61A1,BSG,PLEKHM1,UQCRC2,ARHGAP1,ACSL3,NUMB,CCT3,CUTA,DNM2,DERL1,GLUL,GAPVD1,ZDHHC3,NDEL1,ATP6V1B2,TIMM23,MTX1,SREBF2,PSAP,RAB5C,SLC25A5,PHPT1,RPA1,BUB3,CORO1C,ATP2B4,FLOT2,HSP90AB1,TXNIP,YWHAH,RGCC,HTRA2,AP1G1,RAB35,BCL2L1,CDC37,WBP2,JAK1,TBC…
GO:BP	immune effector process	GO:0002252	7626.45	1.11177e+16	1309	629	103	18017	PAFAH1B2,AP1M1,FCGR2A,INPP5D,HLA-DRB1,PSMD11,PUM2,SIN3A,ARMC8,DHX9,ADAR,VCP,LAMTOR1,QSOX1,KCNAB2,LIMK1,GRB2,ATP6AP2,TRAPPC1,IFITM2,RARA,PGAM1,GSTP1,PSAP,RAB5C,RNASE2,DDX41,C1QBP,HSP90AB1,RGCC,PSMB7,AP1G1,BCL2L1,SIRPA,IRF9,ARPC1B,CAPN1,CST3,MDK,CTSD,HSP90AA1,BRK1,CYBA,CTSZ,ACTB,CTSC,CMTM6,BIN2,ARPC2,PHB,ACTR3,MYD88,UBR4,FOXP1,STAT3,ARL8A,SYK,GGH,GRN,FGR,IFNAR2,ANPEP,TYROBP,XBP1,CORO1A,PDPK1,ITGB2,…
GO:BP	myeloid cell activation involved in immune response	GO:0002275	794.788	1109974877480733	548	629	60	18017	PAFAH1B2,AP1M1,FCGR2A,PSMD11,ARMC8,VCP,LAMTOR1,QSOX1,KCNAB2,ATP6AP2,TRAPPC1,PGAM1,GSTP1,PSAP,RAB5C,RNASE2,HSP90AB1,PSMB7,SIRPA,CAPN1,CST3,CTSD,HSP90AA1,CYBA,CTSZ,CTSC,CMTM6,BIN2,UBR4,ARL8A,SYK,GGH,GRN,FGR,ANPEP,TYROBP,PDPK1,ITGB2,PSMD7,RAC2,DIAPH1,CDK13,VAPA,GATA2,TIMP2,SURF4,PSMD13,PTPN6,TNFRSF1B,GM2A,GDI2,IST1,NCSTN,PA2G4,CTSA,ILF2,APRT,PSMD2,NEU1,SERPINB1
GO:BP	positive regulation of metabolic process	GO:0009893	8468.43	1107219711106743	3970	629	223	18017	CHP1,PAFAH1B2,CTNNB1,EZR,ECD,AP2M1,CASP3,HLA-DRB1,MEPCE,PUM2,SIN3A,SUPT5H,DHX9,ADAR,USP22,CHCHD2,GATA1,STOML2,VCP,KLF13,PTBP1,TRAF7,LAMTOR1,NOLC1,RAF1,MTPN,TFDP2,CDK4,DDA1,PTPN1,NAMPT,CCNT1,RTF1,MYH9,ITGA5,NFIC,ACTN4,GRB2,MYBL2,ATP6AP2,ATF6,EIF3C,ACSL3,FXN,CCT3,DNM2,RAD23A,DERL1,C14ORF166,SHC1,THRAP3,ARID2,RARA,POLR2H,PPRC1,SREBF2,GSTP1,PCBD1,PSAP,BMPR2,DDX41,C1QBP,PSME1,IKZF5,CCND2,DPF2,PRMT1,AT…
GO:BP	cellular response to chemical stimulus	GO:0070887	8592.34	1106588871851837	3419	629	200	18017	CTNNB1,EZR,INPP5D,CASP3,HLA-DRB1,PSMD11,EHMT2,SIN3A,DHX9,ADAR,CHCHD2,GATA1,VCP,PTBP1,LAMTOR1,RAF1,CDK4,PTPN1,GPX1,CAPZA1,TPP1,NAMPT,PTPRE,DCPS,GNAQ,ITGA5,STIP1,P4HB,ACTN4,GRB2,BSG,MYBL2,ATF6,FXN,OTUB1,DNM2,DERL1,IFITM2,PRMT5,SHC1,RARA,SIGMAR1,HLA-DRA,PSMB3,NDEL1,POLR2H,ATP6V1B2,FIBP,PPIF,GSTP1,PSAP,SLC25A5,BMPR2,DDX41,C1QBP,EIF4EBP1,PSME1,AKR1B1,PHPT1,ATP2B4,ADNP2,HSP90AB1,YWHAH,RGCC,TTLL12,PSMB7…
GO:BP	cellular response to organic substance	GO:0071310	9586.12	1.10184e+16	2797	629	173	18017	CTNNB1,EZR,INPP5D,CASP3,HLA-DRB1,PSMD11,EHMT2,SIN3A,DHX9,ADAR,GATA1,VCP,PTBP1,LAMTOR1,RAF1,CDK4,PTPN1,CAPZA1,TPP1,NAMPT,PTPRE,DCPS,ITGA5,STIP1,P4HB,ACTN4,GRB2,MYBL2,ATF6,OTUB1,DNM2,DERL1,IFITM2,PRMT5,SHC1,RARA,HLA-DRA,PSMB3,NDEL1,POLR2H,ATP6V1B2,FIBP,GSTP1,PSAP,SLC25A5,BMPR2,DDX41,EIF4EBP1,PSME1,AKR1B1,PHPT1,ATP2B4,ADNP2,HSP90AB1,YWHAH,TTLL12,PSMB7,HTRA2,RAB35,BCL2L1,CDC37,SIRPA,SHMT2,TALDO1,IRF9…
GO:BP	immune system process	GO:0002376	114212	1.09423e+16	3287	629	194	18017	PAFAH1B2,AP1M1,CTNNB1,EZR,FCGR2A,INPP5D,AP2M1,CASP3,HLA-DRB1,PSMD11,PUM2,SIN3A,ARMC8,DHX9,ADAR,GATA1,STOML2,VCP,KLF13,LAMTOR1,RAF1,PTPN1,GPX1,CAPZA1,QSOX1,NAMPT,KCNAB2,AP1B1,MYH9,LIMK1,ITGA5,GRB2,SEC61A1,BSG,ATP6AP2,OTUB1,TRAPPC1,DNM2,IFITM2,SHC1,RARA,GYPC,HLA-DRA,PSMB3,PGAM1,GSTP1,PSAP,RAB5C,RNASE2,DDX41,C1QBP,PSME1,PHPT1,DPF2,PRMT1,FLOT2,HSP90AB1,RGCC,TTLL12,PSMB7,AP1G1,RAB35,BCL2L1,CDC37,SIRPA…
GO:BP	positive regulation of macromolecule metabolic process	GO:0010604	116587	1.09334e+16	3667	629	210	18017	CHP1,CTNNB1,EZR,ECD,AP2M1,CASP3,HLA-DRB1,MEPCE,PUM2,SIN3A,SUPT5H,DHX9,ADAR,USP22,CHCHD2,GATA1,STOML2,VCP,KLF13,PTBP1,TRAF7,LAMTOR1,NOLC1,RAF1,MTPN,TFDP2,CDK4,DDA1,PTPN1,NAMPT,CCNT1,RTF1,MYH9,ITGA5,NFIC,ACTN4,MYBL2,ATP6AP2,ATF6,EIF3C,CCT3,DNM2,RAD23A,DERL1,C14ORF166,SHC1,THRAP3,ARID2,RARA,POLR2H,PPRC1,SREBF2,PCBD1,PSAP,BMPR2,DDX41,C1QBP,PSME1,IKZF5,CCND2,DPF2,PRMT1,ATP2B4,HSP90AB1,YWHAH,RGCC,HTRA2…
GO:BP	protein-containing complex assembly	GO:0065003	11804.8	1.09279e+16	1677	629	121	18017	BAZ2A,CHP1,CTNNB1,AP2M1,HLA-DRB1,PSMD11,NOP2,DHX9,ADAR,STOML2,VCP,TRAF7,RAF1,MTPN,CAPZA1,ZNFX1,P4HB,GRB2,TSPYL1,EIF3C,ACSL3,TRAPPC1,ATPAF1,CCT3,DNM2,PRMT5,SNRPD3,SIGMAR1,HLA-DRA,NDEL1,EIF4EBP1,RPA1,PRMT1,HSP90AB1,TRAPPC10,H1FX,MED6,SHMT2,NDUFB9,ARPC1B,AAR2,CLTC,SRSF9,FSCN1,NUP153,FARSA,HSP90AA1,BRK1,EIF3F,CYBA,CTSZ,EIF4H,MSRB2,EIF5,SRSF6,ASF1B,DDB1,CTSC,BIN2,ARPC2,ACTR3,PFN1,MAT2A,CHMP4B,TNFRSF1A…
GO:BP	intracellular protein transport	GO:0006886	122593	1.09115e+16	1184	629	96	18017	CHP1,AP1M1,AP2M1,NUP214,ATG3,VCP,TOMM40,NOLC1,KPNA4,TFDP2,PTPN1,AP1B1,SEC61A1,UQCRC2,DERL1,ZDHHC3,NDEL1,TIMM23,SREBF2,PSAP,RAB5C,HSP90AB1,TXNIP,YWHAH,HTRA2,AP1G1,CDC37,TBC1D9B,GABARAP,CLTC,SRSF9,STRADB,NUP153,HSP90AA1,TNPO3,RBM22,USP36,SRSF6,YWHAQ,DDX39A,CHMP4B,SRSF1,STAT3,ARL6IP1,SYK,TXN,RPL8,STX11,EDEM1,RAE1,UBE2G2,EIF5A,ARF1,ITGB2,RAC2,SSNA1,CD81,ARCN1,SRP72,FLNA,RAB22A,NUP98,RBM8A,SLBP,RPS18,…
GO:BP	myeloid leukocyte activation	GO:0002274	1380.3	1.086e+16	668	629	67	18017	PAFAH1B2,AP1M1,FCGR2A,PSMD11,ARMC8,VCP,LAMTOR1,QSOX1,NAMPT,KCNAB2,ATP6AP2,TRAPPC1,PGAM1,GSTP1,PSAP,RAB5C,RNASE2,HSP90AB1,PSMB7,SIRPA,CAPN1,CST3,CTSD,HSP90AA1,CYBA,CTSZ,CTSC,CMTM6,BIN2,UBR4,FOXP1,ARL8A,SYK,GGH,GRN,FGR,ANPEP,LDLR,TYROBP,NDRG1,RHOH,PDPK1,ITGB2,PSMD7,RAC2,DIAPH1,CDK13,VAPA,GATA2,TIMP2,SURF4,PSMD13,PTPN6,TNFRSF1B,GM2A,GDI2,HSPD1,IST1,PREX1,NCSTN,PA2G4,CTSA,ILF2,APRT,PSMD2,NEU1,SERPINB1
GO:BP	myeloid leukocyte mediated immunity	GO:0002444	141812	1084828691201394	555	629	60	18017	PAFAH1B2,AP1M1,FCGR2A,PSMD11,ARMC8,VCP,LAMTOR1,QSOX1,KCNAB2,ATP6AP2,TRAPPC1,PGAM1,GSTP1,PSAP,RAB5C,RNASE2,HSP90AB1,PSMB7,SIRPA,CAPN1,CST3,CTSD,HSP90AA1,CYBA,CTSZ,CTSC,CMTM6,BIN2,UBR4,ARL8A,SYK,GGH,GRN,FGR,ANPEP,TYROBP,PDPK1,ITGB2,PSMD7,RAC2,DIAPH1,CDK13,VAPA,GATA2,TIMP2,SURF4,PSMD13,PTPN6,TNFRSF1B,GM2A,GDI2,IST1,NCSTN,PA2G4,CTSA,ILF2,APRT,PSMD2,NEU1,SERPINB1
GO:BP	organic substance metabolic process	GO:0071704	141920	1.0848e+16	11368	629	486	18017	BAZ2A,CHP1,PAFAH1B2,CTNNB1,EZR,TPP2,ECD,INPP5D,AP2M1,CASP3,HLA-DRB1,MEPCE,PSMD11,HIPK3,NOP2,ORC1,NUP214,ATG3,MRPL38,PUM2,EHMT2,SIN3A,SUPT5H,ARMC8,DHX9,PPP4C,ADAR,USP22,CHCHD2,GATA1,STOML2,VCP,KLF13,PTBP1,SMC1A,TRAF7,CXXC5,HBP1,LAMTOR1,NOLC1,RAF1,MTPN,TFDP2,CDK4,DDA1,PTPN1,GPX1,PFDN5,QSOX1,TPP1,NAMPT,PTPRE,DCPS,CCNT1,HDLBP,PI4KB,RTF1,ZNFX1,MYH9,CTDSP1,GNAQ,LIMK1,ITGA5,NFIC,P4HB,ACTN4,GRB2,VDAC1,BS…
GO:BP	organelle organization	GO:0006996	173777	1.076e+16	4044	629	225	18017	BAZ2A,CHP1,AP1M1,CTNNB1,EZR,AP2M1,HLA-DRB1,NOP2,ATG3,PUM2,EHMT2,SIN3A,SEPT6,DHX9,USP22,CHCHD2,GATA1,STOML2,VCP,PDLIM7,SMC1A,TRAF7,LAMTOR1,TOMM40,NOLC1,RAF1,MTPN,TFDP2,PTPN1,GPX1,CAPZA1,TPP1,RTF1,ZNFX1,MYH9,LIMK1,ACTN4,GRB2,SEC61A1,TSPYL1,VDAC1,MYBL2,ATP6AP2,UQCRC2,CHCHD3,FXN,OTUB1,TRAPPC1,ATPAF1,CCT3,DNM2,PRMT5,SHC1,PDS5A,POLD2,ARID2,NDEL1,ATP6V1B2,TIMM23,PPIF,MTX1,PPRC1,SREBF2,SLC25A5,C1QBP,VMP1…
GO:BP	protein-containing complex subunit organization	GO:0043933	196871	1.07058e+16	1960	629	134	18017	BAZ2A,CHP1,CTNNB1,AP2M1,HLA-DRB1,PSMD11,NOP2,MRPL38,DHX9,ADAR,STOML2,VCP,TRAF7,RAF1,MTPN,CAPZA1,ZNFX1,P4HB,GRB2,TSPYL1,EIF3C,ACSL3,TRAPPC1,ATPAF1,CCT3,DNM2,PRMT5,SNRPD3,ARID2,SIGMAR1,HLA-DRA,NDEL1,EIF4EBP1,RPA1,PRMT1,HSP90AB1,TRAPPC10,H1FX,MED6,SHMT2,NDUFB9,ARPC1B,GABARAP,AAR2,MAP1LC3B2,CLTC,SRSF9,FSCN1,NUP153,FARSA,HSP90AA1,BRK1,EIF3F,CYBA,CTSZ,EIF4H,MSRB2,EIF5,SRSF6,ASF1B,DDB1,CTSC,BIN2,ARPC2,A…
GO:BP	cellular component organization	GO:0016043	200010	1.06989e+16	6499	629	320	18017	BAZ2A,CHP1,AP1M1,CTNNB1,EZR,AP2M1,CASP3,HLA-DRB1,PSMD11,NOP2,ATG3,MRPL38,PUM2,EHMT2,SIN3A,SEPT6,DHX9,ADAR,USP22,CHCHD2,GATA1,STOML2,VCP,PDLIM7,SMC1A,TRAF7,LAMTOR1,TOMM40,NOLC1,RAF1,MTPN,TFDP2,CDK4,PTPN1,GPX1,CAPZA1,QSOX1,TPP1,RTF1,ZNFX1,MYH9,LIMK1,ITGA5,P4HB,ACTN4,GRB2,SEC61A1,TSPYL1,VDAC1,BSG,MYBL2,PLEKHM1,ATP6AP2,UQCRC2,SLC39A8,EIF3C,ACSL3,CHCHD3,FXN,NUMB,OTUB1,TRAPPC1,CAPNS1,ATPAF1,CCT3,DNM2,P…
GO:BP	positive regulation of nitrogen compound metabolic process	GO:0051173	222335	1065299273187134	3285	629	193	18017	CHP1,CTNNB1,EZR,ECD,CASP3,HLA-DRB1,MEPCE,SIN3A,SUPT5H,DHX9,USP22,CHCHD2,GATA1,VCP,KLF13,PTBP1,TRAF7,LAMTOR1,NOLC1,RAF1,MTPN,TFDP2,CDK4,DDA1,PTPN1,NAMPT,CCNT1,RTF1,MYH9,ITGA5,NFIC,ACTN4,MYBL2,ATF6,EIF3C,ACSL3,CCT3,DNM2,RAD23A,DERL1,C14ORF166,SHC1,THRAP3,ARID2,RARA,PPRC1,SREBF2,PCBD1,PSAP,BMPR2,DDX41,C1QBP,PSME1,IKZF5,CCND2,DPF2,PRMT1,ATP2B4,HSP90AB1,YWHAH,RGCC,HTRA2,ANKLE2,H1FX,MED6,WBP2,TIPARP,SU…
GO:BP	negative regulation of cellular process	GO:0048523	25598.6	1.05918e+16	5086	629	266	18017	BAZ2A,CHP1,CTNNB1,EZR,INPP5D,AP2M1,CASP3,HLA-DRB1,MEPCE,PSMD11,HIPK3,ORC1,ATG3,EHMT2,SIN3A,SUPT5H,DHX9,ADAR,GATA1,VCP,KLF13,PTBP1,CXXC5,HBP1,LAMTOR1,RAF1,MTPN,TFDP2,CDK4,PTPN1,GPX1,CAPZA1,PFDN5,QSOX1,NAMPT,PTPRE,DCPS,CCNT1,RTF1,ZNFX1,MYH9,CTDSP1,GNAQ,LIMK1,ITGA5,NFIC,ACTN4,GRB2,VDAC1,DRAP1,ARHGAP1,FXN,NUMB,OTUB1,DNM2,C14ORF166,PRMT5,SHC1,THRAP3,PDS5A,ARID2,RARA,PSMB3,PPIF,SREBF2,GSTP1,PSAP,SLC25A…
GO:BP	regulated exocytosis	GO:0045055	265131	1.05765e+16	779	629	73	18017	CHP1,PAFAH1B2,AP1M1,FCGR2A,PSMD11,ARMC8,VCP,LAMTOR1,QSOX1,KCNAB2,MYH9,ACTN4,ATP6AP2,TRAPPC1,PGAM1,GSTP1,PSAP,RAB5C,RNASE2,HSP90AB1,PSMB7,AP1G1,SIRPA,ARHGAP17,CAPN1,CST3,CTSD,HSP90AA1,CYBA,CTSZ,BRAF,CTSC,CMTM6,BIN2,UBR4,GNAI2,ARL8A,SYK,GGH,GRN,STX11,FGR,ANPEP,TYROBP,CORO1A,ARF1,PDPK1,ITGB2,PSMD7,RAC2,DIAPH1,FLNA,CDK13,VAPA,GATA2,TIMP2,SURF4,PSMD13,PTPN6,TNFRSF1B,GM2A,GDI2,IST1,NCSTN,PA2G4,CTSA,ILF…
GO:BP	macromolecule localization	GO:0033036	284014	1054665952994751	3246	629	191	18017	CHP1,AP1M1,CTNNB1,EZR,AP2M1,HLA-DRB1,MEPCE,NUP214,ATG3,SIN3A,SEPT6,DHX9,COPE,STOML2,VCP,LAMTOR1,TOMM40,NOLC1,RAF1,KPNA4,TFDP2,PTPN1,TPP1,KCNAB2,AP1B1,HDLBP,MYH9,ACTN4,SEC61A1,BSG,PLEKHM1,UQCRC2,ARHGAP1,ACSL3,NUMB,CCT3,CUTA,DNM2,DERL1,GLUL,C14ORF166,SIGMAR1,GAPVD1,ZDHHC3,NDEL1,ATP6V1B2,TIMM23,MTX1,SREBF2,PSAP,RAB5C,SLC25A5,PHPT1,RPA1,BUB3,CORO1C,ATP2B4,FLOT2,HSP90AB1,TXNIP,YWHAH,RGCC,HTRA2,AP1G1,R…
GO:BP	nucleic acid metabolic process	GO:0090304	29201.4	1.05346e+16	5194	629	270	18017	BAZ2A,CHP1,CTNNB1,EZR,ECD,CASP3,HLA-DRB1,MEPCE,PSMD11,HIPK3,NOP2,ORC1,NUP214,PUM2,EHMT2,SIN3A,SUPT5H,DHX9,PPP4C,ADAR,USP22,CHCHD2,GATA1,VCP,KLF13,PTBP1,SMC1A,CXXC5,HBP1,NOLC1,RAF1,MTPN,TFDP2,CDK4,PFDN5,NAMPT,DCPS,CCNT1,RTF1,ZNFX1,CTDSP1,NFIC,ACTN4,MYBL2,DDX24,LIG1,DRAP1,SLC39A8,ATF6,OTUB1,CCT3,DNM2,RAD23A,C14ORF166,PRMT5,SHC1,THRAP3,SNRPD3,PDS5A,POLD2,ZNF395,ARID2,RARA,PSMB3,POLR2H,PPRC1,SREBF2,P…
GO:BP	organonitrogen compound metabolic process	GO:1901564	36187	1.04414e+16	6961	629	336	18017	BAZ2A,CHP1,CTNNB1,EZR,TPP2,AP2M1,CASP3,HLA-DRB1,PSMD11,HIPK3,NUP214,ATG3,MRPL38,PUM2,EHMT2,SIN3A,ARMC8,DHX9,PPP4C,ADAR,USP22,GATA1,STOML2,VCP,PTBP1,TRAF7,LAMTOR1,NOLC1,RAF1,MTPN,CDK4,DDA1,PTPN1,GPX1,QSOX1,TPP1,NAMPT,PTPRE,CCNT1,RTF1,MYH9,CTDSP1,GNAQ,LIMK1,ITGA5,P4HB,GRB2,NT5C2,ATP6AP2,UQCRC2,SLC39A8,SLC25A39,EIF3C,ACSL3,FXN,OTUB1,CAPNS1,RAD23A,DERL1,GLUL,C14ORF166,PRMT5,SHC1,SNRPD3,RPN2,RARA,PSMB…
GO:BP	regulation of nucleobase-containing compound metabolic process	GO:0019219	576227	1.02394e+16	4087	629	225	18017	BAZ2A,CHP1,CTNNB1,EZR,ECD,HLA-DRB1,MEPCE,PSMD11,NOP2,ORC1,NUP214,PUM2,EHMT2,SIN3A,SUPT5H,DHX9,PPP4C,USP22,CHCHD2,GATA1,VCP,KLF13,PTBP1,CXXC5,HBP1,NOLC1,RAF1,MTPN,TFDP2,PFDN5,NAMPT,CCNT1,RTF1,ZNFX1,CTDSP1,NFIC,ACTN4,MYBL2,DRAP1,SLC39A8,ATF6,OTUB1,CCT3,DNM2,C14ORF166,PRMT5,SHC1,THRAP3,ZNF395,ARID2,RARA,PSMB3,PGAM1,PPRC1,SREBF2,PCBD1,BMPR2,DDX41,C1QBP,PSME1,IKZF5,YLPM1,ZNF142,GATAD2B,DPF2,SNRPA,ATP2…
GO:BP	regulation of mRNA metabolic process	GO:1903311	80606.2	1009363136741712	349	629	45	18017	PSMD11,NUP214,PUM2,SUPT5H,DHX9,PTBP1,CCNT1,THRAP3,PSMB3,C1QBP,PSME1,SNRPA,PSMB7,SMU1,RBM4,PSMB2,SRSF9,PSMF1,SRSF6,KHSRP,MYD88,SRSF1,YBX1,KHDRBS1,PSMC5,PRPF19,EXOSC1,PSMD7,ZC3HAV1,NUP98,IGF2BP2,RBM8A,POLR2G,PSMB4,PSMD13,CPSF6,SAMD4B,GTPBP1,PSME2,REST,TRA2A,U2AF2,HSPB1,PSMD2,NPM1
GO:BP	positive regulation of biosynthetic process	GO:0009891	98018.9	100086900304605	2087	629	138	18017	CHP1,CTNNB1,ECD,HLA-DRB1,MEPCE,SIN3A,SUPT5H,DHX9,USP22,CHCHD2,GATA1,STOML2,VCP,KLF13,NOLC1,RAF1,MTPN,TFDP2,CDK4,NAMPT,CCNT1,NFIC,ACTN4,MYBL2,ATF6,EIF3C,ACSL3,CCT3,DNM2,C14ORF166,SHC1,THRAP3,RARA,PPRC1,SREBF2,PCBD1,BMPR2,DDX41,C1QBP,IKZF5,DPF2,PRMT1,HSP90AB1,YWHAH,RGCC,H1FX,MED6,WBP2,SUPT7L,GPS2,PBX2,MDK,TNIP1,KLF6,HSP90AA1,SOX12,IER5,CYBA,ARNT,DDB1,ILK,KHSRP,MAP2K3,PHB,ACTR3,MYD88,HIPK2,PFN1,ARID…
GO:BP	nucleobase-containing compound metabolic process	GO:0006139	1.00263e+06	999885771235243	5713	629	288	18017	BAZ2A,CHP1,CTNNB1,EZR,ECD,CASP3,HLA-DRB1,MEPCE,PSMD11,HIPK3,NOP2,ORC1,NUP214,PUM2,EHMT2,SIN3A,SUPT5H,DHX9,PPP4C,ADAR,USP22,CHCHD2,GATA1,STOML2,VCP,KLF13,PTBP1,SMC1A,CXXC5,HBP1,NOLC1,RAF1,MTPN,TFDP2,CDK4,GPX1,PFDN5,NAMPT,DCPS,CCNT1,RTF1,ZNFX1,CTDSP1,NFIC,ACTN4,MYBL2,NT5C2,DDX24,LIG1,DRAP1,SLC39A8,ATF6,ACSL3,OTUB1,CCT3,DNM2,RAD23A,C14ORF166,PRMT5,SHC1,THRAP3,SNRPD3,PDS5A,POLD2,ZNF395,ARID2,RARA,PSM…
GO:BP	cellular nitrogen compound biosynthetic process	GO:0044271	1.06521e+06	997256406230534	4963	629	259	18017	BAZ2A,CHP1,CTNNB1,EZR,ECD,HLA-DRB1,MEPCE,PSMD11,HIPK3,NOP2,ORC1,MRPL38,PUM2,EHMT2,SIN3A,SUPT5H,DHX9,USP22,CHCHD2,GATA1,STOML2,VCP,KLF13,PTBP1,CXXC5,HBP1,NOLC1,RAF1,MTPN,TFDP2,CDK4,GPX1,PFDN5,NAMPT,CCNT1,RTF1,ZNFX1,CTDSP1,NFIC,ACTN4,MYBL2,NT5C2,LIG1,DRAP1,SLC39A8,SLC25A39,ATF6,EIF3C,ACSL3,FXN,CCT3,DNM2,C14ORF166,PRMT5,SHC1,THRAP3,SNRPD3,POLD2,ZNF395,ARID2,RARA,PSMB3,POLR2H,PPRC1,SREBF2,PCBD1,BMPR2…
GO:BP	regulation of cellular biosynthetic process	GO:0031326	1.16738e+06	9932787156945156	4286	629	232	18017	BAZ2A,CHP1,CTNNB1,EZR,ECD,HLA-DRB1,MEPCE,PSMD11,NOP2,ORC1,PUM2,EHMT2,SIN3A,SUPT5H,DHX9,USP22,CHCHD2,GATA1,STOML2,VCP,KLF13,PTBP1,CXXC5,HBP1,NOLC1,RAF1,MTPN,TFDP2,CDK4,PFDN5,NAMPT,CCNT1,RTF1,ZNFX1,CTDSP1,NFIC,ACTN4,MYBL2,DRAP1,SLC39A8,ATF6,EIF3C,ACSL3,CCT3,DNM2,C14ORF166,PRMT5,SHC1,THRAP3,PDS5A,ZNF395,ARID2,RARA,PSMB3,PPRC1,SREBF2,PCBD1,BMPR2,DDX41,C1QBP,EIF4EBP1,PSME1,IKZF5,ZNF142,GATAD2B,DPF2,PR…
GO:BP	positive regulation of cellular biosynthetic process	GO:0031328	1.33063e+06	9875942292539618	2052	629	136	18017	CHP1,CTNNB1,ECD,HLA-DRB1,MEPCE,SIN3A,SUPT5H,DHX9,USP22,CHCHD2,GATA1,STOML2,VCP,KLF13,NOLC1,RAF1,TFDP2,CDK4,NAMPT,CCNT1,NFIC,ACTN4,MYBL2,ATF6,EIF3C,ACSL3,CCT3,DNM2,C14ORF166,SHC1,THRAP3,RARA,PPRC1,SREBF2,PCBD1,BMPR2,DDX41,C1QBP,IKZF5,DPF2,PRMT1,HSP90AB1,YWHAH,RGCC,H1FX,MED6,WBP2,SUPT7L,GPS2,PBX2,MDK,TNIP1,KLF6,HSP90AA1,SOX12,IER5,ARNT,DDB1,ILK,KHSRP,MAP2K3,PHB,ACTR3,MYD88,HIPK2,PFN1,ARID4B,TNFRSF1…
GO:BP	cellular aromatic compound metabolic process	GO:0006725	1.4138e+06	9849611081471436	5939	629	296	18017	BAZ2A,CHP1,CTNNB1,EZR,ECD,CASP3,HLA-DRB1,MEPCE,PSMD11,HIPK3,NOP2,ORC1,NUP214,PUM2,EHMT2,SIN3A,SUPT5H,DHX9,PPP4C,ADAR,USP22,CHCHD2,GATA1,STOML2,VCP,KLF13,PTBP1,SMC1A,CXXC5,HBP1,NOLC1,RAF1,MTPN,TFDP2,CDK4,GPX1,PFDN5,NAMPT,DCPS,CCNT1,RTF1,ZNFX1,CTDSP1,NFIC,ACTN4,MYBL2,NT5C2,DDX24,LIG1,DRAP1,SLC39A8,SLC25A39,ATF6,ACSL3,FXN,OTUB1,CCT3,DNM2,RAD23A,C14ORF166,PRMT5,SHC1,THRAP3,SNRPD3,PDS5A,POLD2,ZNF395,A…
GO:BP	heterocycle metabolic process	GO:0046483	1.62972e+06	9787887435650726	5892	629	294	18017	BAZ2A,CHP1,CTNNB1,EZR,ECD,CASP3,HLA-DRB1,MEPCE,PSMD11,HIPK3,NOP2,ORC1,NUP214,PUM2,EHMT2,SIN3A,SUPT5H,DHX9,PPP4C,ADAR,USP22,CHCHD2,GATA1,STOML2,VCP,KLF13,PTBP1,SMC1A,CXXC5,HBP1,NOLC1,RAF1,MTPN,TFDP2,CDK4,GPX1,PFDN5,NAMPT,DCPS,CCNT1,RTF1,ZNFX1,CTDSP1,NFIC,ACTN4,MYBL2,NT5C2,DDX24,LIG1,DRAP1,SLC39A8,SLC25A39,ATF6,ACSL3,FXN,OTUB1,CCT3,DNM2,RAD23A,C14ORF166,PRMT5,SHC1,THRAP3,SNRPD3,PDS5A,POLD2,ZNF395,A…
GO:BP	regulation of response to stimulus	GO:0048583	1.6617e+06	9779447627188412	4399	629	236	18017	CHP1,CTNNB1,EZR,FCGR2A,INPP5D,HLA-DRB1,PSMD11,HIPK3,NOP2,NUP214,PUM2,EHMT2,SIN3A,DHX9,PPP4C,ADAR,CHCHD2,GATA1,STOML2,VCP,PTBP1,TRAF7,CXXC5,LAMTOR1,RAF1,MTPN,TFDP2,CDK4,PTPN1,GPX1,PFDN5,NAMPT,PTPRE,MYH9,GNAQ,LIMK1,ITGA5,P4HB,ACTN4,GRB2,ATP6AP2,SLC20A1,ARHGAP1,ATF6,FXN,OTUB1,DNM2,PRMT5,SHC1,ARID2,RARA,HLA-DRA,PSMB3,ZDHHC3,NDEL1,PPIF,SREBF2,GSTP1,PSAP,SLC25A5,BMPR2,C1QBP,PSME1,AKR1B1,EEF1D,GPS1,FEM1…
GO:BP	leukocyte activation	GO:0045321	1.82198e+06	9739456130215076	1335	629	101	18017	PAFAH1B2,AP1M1,CTNNB1,FCGR2A,INPP5D,CASP3,HLA-DRB1,PSMD11,ARMC8,STOML2,VCP,LAMTOR1,QSOX1,NAMPT,KCNAB2,MYH9,GRB2,ATP6AP2,TRAPPC1,RARA,PGAM1,GSTP1,PSAP,RAB5C,RNASE2,FLOT2,HSP90AB1,PSMB7,AP1G1,SIRPA,GPS2,CAPN1,CST3,MDK,CTSD,KLF6,HSP90AA1,SOX12,BAG6,CYBA,CTSZ,BRAF,CTSC,CMTM6,BIN2,DROSHA,PHB,MYD88,UBR4,FOXP1,STAT3,ARL8A,SYK,GGH,FKBP1A,GRN,FGR,HLA-DPA1,ANPEP,LDLR,TYROBP,XBP1,NDRG1,CORO1A,RHOH,PDPK1,ITG…
GO:BP	response to cytokine	GO:0034097	191591	9717625593096760	1238	629	96	18017	INPP5D,CASP3,HLA-DRB1,PSMD11,DHX9,ADAR,CDK4,PTPN1,CAPZA1,STIP1,P4HB,ACTN4,GRB2,SEC61A1,MYBL2,OTUB1,IFITM2,SHC1,RARA,HLA-DRA,PSMB3,GSTP1,SLC25A5,DDX41,PSME1,HSP90AB1,TTLL12,PSMB7,HTRA2,BCL2L1,CDC37,SIRPA,SHMT2,TALDO1,IRF9,JAK1,GPS2,PSMB2,FSCN1,PSMF1,HSP90AA1,CYBA,SERPINB2,ILK,KHSRP,PHB,ACTR3,MYD88,MPC1,MAT2A,TNFRSF1A,STAT3,SPATA2,SYK,JUNB,IFNAR2,HLA-DPA1,CSF3R,XBP1,UBE2G2,PSMC5,CORO1A,JUND,ARF1,IT…
GO:BP	organic cyclic compound metabolic process	GO:1901360	2.50393e+06	9601377211208618	6177	629	304	18017	BAZ2A,CHP1,CTNNB1,EZR,ECD,CASP3,HLA-DRB1,MEPCE,PSMD11,HIPK3,NOP2,ORC1,NUP214,PUM2,EHMT2,SIN3A,SUPT5H,DHX9,PPP4C,ADAR,USP22,CHCHD2,GATA1,STOML2,VCP,KLF13,PTBP1,SMC1A,CXXC5,HBP1,LAMTOR1,NOLC1,RAF1,MTPN,TFDP2,CDK4,GPX1,PFDN5,NAMPT,DCPS,CCNT1,HDLBP,RTF1,ZNFX1,CTDSP1,NFIC,ACTN4,MYBL2,NT5C2,DDX24,LIG1,DRAP1,SLC39A8,SLC25A39,ATF6,ACSL3,FXN,OTUB1,CCT3,DNM2,RAD23A,C14ORF166,PRMT5,SHC1,THRAP3,SNRPD3,PDS5A,…
GO:BP	establishment of protein localization	GO:0045184	2.89341e+06	9538590172001340	2138	629	139	18017	CHP1,AP1M1,EZR,AP2M1,HLA-DRB1,NUP214,ATG3,DHX9,COPE,VCP,TOMM40,NOLC1,RAF1,KPNA4,TFDP2,PTPN1,AP1B1,MYH9,ACTN4,SEC61A1,PLEKHM1,UQCRC2,ARHGAP1,ACSL3,NUMB,CCT3,DNM2,DERL1,GLUL,GAPVD1,ZDHHC3,NDEL1,ATP6V1B2,TIMM23,MTX1,SREBF2,PSAP,RAB5C,SLC25A5,PHPT1,CORO1C,HSP90AB1,TXNIP,YWHAH,RGCC,HTRA2,AP1G1,RAB35,CDC37,WBP2,TBC1D9B,GABARAP,CLTC,SRSF9,STRADB,NUP153,CTSD,HSP90AA1,BAG6,TNPO3,SFT2D2,RBM22,USP36,ARRDC3,…
GO:BP	ribonucleoprotein complex subunit organization	GO:0071826	294279	9531241082394604	202	629	33	18017	NOP2,DHX9,ADAR,VCP,TRAF7,EIF3C,PRMT5,SNRPD3,HSP90AB1,AAR2,SRSF9,HSP90AA1,EIF3F,EIF4H,EIF5,SRSF6,SRSF1,EIF3D,EIF3A,NAF1,STRAP,EIF3E,PRPF19,EIF3M,EIF3B,SF3A1,RPS5,CPSF6,RPL3,EIF3L,SNRPC,DDX39B,RPL24
GO:BP	regulation of biosynthetic process	GO:0009889	3.26855e+06	9485645313390800	4375	629	234	18017	BAZ2A,CHP1,CTNNB1,EZR,ECD,HLA-DRB1,MEPCE,PSMD11,NOP2,ORC1,PUM2,EHMT2,SIN3A,SUPT5H,DHX9,USP22,CHCHD2,GATA1,STOML2,VCP,KLF13,PTBP1,CXXC5,HBP1,NOLC1,RAF1,MTPN,TFDP2,CDK4,PFDN5,NAMPT,CCNT1,RTF1,ZNFX1,CTDSP1,NFIC,ACTN4,MYBL2,DRAP1,SLC39A8,ATF6,EIF3C,ACSL3,CCT3,DNM2,C14ORF166,PRMT5,SHC1,THRAP3,PDS5A,ZNF395,ARID2,RARA,PSMB3,PPRC1,SREBF2,GSTP1,PCBD1,BMPR2,DDX41,C1QBP,EIF4EBP1,PSME1,IKZF5,ZNF142,GATAD2B,D…
GO:BP	protein catabolic process	GO:0030163	353880	9451144060147552	965	629	81	18017	CTNNB1,EZR,AP2M1,PSMD11,ARMC8,USP22,VCP,DDA1,GPX1,TPP1,RAD23A,DERL1,PSMB3,PSAP,PSME1,BUB3,HSP90AB1,PSMB7,HTRA2,TIPARP,PCNP,CLTC,PSMB2,CST3,CTSD,ZNRF1,PSMF1,HSP90AA1,BAG6,CTSZ,USP36,DDB1,CTSC,PHB,HIPK2,UBR4,CHMP4B,ZFAND2A,KCTD10,RNF130,ODC1,ANAPC16,EDEM1,LDLR,XBP1,UBE2G2,PSMC5,UBXN1,PRPF19,PSMD7,CD81,SKP2,FLNA,FBXW11,TIMP2,CSNK1A1,PSMB4,SGTA,COPS3,PML,PSMD13,CYLD,SNX5,HSPA5,MTA1,RNF4,TNFRSF1B,UBE2…
GO:BP	negative regulation of macromolecule metabolic process	GO:0010605	366717	9435668511913636	3213	629	186	18017	BAZ2A,CHP1,CTNNB1,EZR,INPP5D,CASP3,HLA-DRB1,MEPCE,PSMD11,HIPK3,NUP214,PUM2,EHMT2,SIN3A,SUPT5H,DHX9,ADAR,GATA1,PTBP1,CXXC5,HBP1,RAF1,TFDP2,PTPN1,GPX1,PFDN5,DCPS,CCNT1,RTF1,ZNFX1,CTDSP1,GNAQ,LIMK1,NFIC,DRAP1,OTUB1,C14ORF166,PRMT5,SHC1,THRAP3,PDS5A,RARA,PSMB3,POLR2H,SREBF2,GSTP1,BMPR2,C1QBP,EIF4EBP1,PSME1,IKZF5,GPS1,GATAD2B,DPF2,CORO1C,ATP2B4,FLOT2,HSP90AB1,TXNIP,RGCC,PSMB7,SIRPA,H1FX,SHMT2,RBM4,TIP…
GO:BP	cellular response to cytokine stimulus	GO:0071345	54434.1	9264129230962686	1143	629	90	18017	INPP5D,CASP3,HLA-DRB1,PSMD11,DHX9,ADAR,CDK4,PTPN1,CAPZA1,STIP1,P4HB,ACTN4,GRB2,MYBL2,OTUB1,IFITM2,SHC1,HLA-DRA,PSMB3,GSTP1,SLC25A5,DDX41,PSME1,HSP90AB1,TTLL12,PSMB7,HTRA2,BCL2L1,CDC37,SIRPA,TALDO1,IRF9,JAK1,GPS2,PSMB2,FSCN1,PSMF1,HSP90AA1,CYBA,SERPINB2,ILK,KHSRP,PHB,ACTR3,MYD88,MPC1,MAT2A,TNFRSF1A,STAT3,SPATA2,SYK,JUNB,IFNAR2,HLA-DPA1,CSF3R,XBP1,UBE2G2,PSMC5,CORO1A,ARF1,ITGB2,PSMD7,FOXO3,IFITM1,F…
GO:BP	positive regulation of macromolecule biosynthetic process	GO:0010557	565850	9247298930553198	1940	629	129	18017	CHP1,CTNNB1,ECD,HLA-DRB1,MEPCE,SIN3A,SUPT5H,DHX9,USP22,CHCHD2,GATA1,STOML2,KLF13,NOLC1,RAF1,MTPN,TFDP2,CDK4,NAMPT,CCNT1,NFIC,ACTN4,MYBL2,ATF6,EIF3C,CCT3,DNM2,C14ORF166,SHC1,THRAP3,RARA,PPRC1,SREBF2,PCBD1,BMPR2,DDX41,C1QBP,IKZF5,DPF2,PRMT1,HSP90AB1,YWHAH,RGCC,H1FX,MED6,WBP2,SUPT7L,GPS2,PBX2,MDK,TNIP1,KLF6,HSP90AA1,SOX12,IER5,ARNT,ILK,KHSRP,MAP2K3,PHB,ACTR3,MYD88,HIPK2,PFN1,ARID4B,TNFRSF1A,EIF3D,ST…
GO:BP	ribonucleoprotein complex assembly	GO:0022618	612319	9213022456295304	195	629	32	18017	NOP2,DHX9,ADAR,TRAF7,EIF3C,PRMT5,SNRPD3,HSP90AB1,AAR2,SRSF9,HSP90AA1,EIF3F,EIF4H,EIF5,SRSF6,SRSF1,EIF3D,EIF3A,NAF1,STRAP,EIF3E,PRPF19,EIF3M,EIF3B,SF3A1,RPS5,CPSF6,RPL3,EIF3L,SNRPC,DDX39B,RPL24
GO:BP	regulation of macromolecule biosynthetic process	GO:0010556	63541.5	9196942466488040	4127	629	223	18017	BAZ2A,CHP1,CTNNB1,EZR,ECD,HLA-DRB1,MEPCE,PSMD11,NOP2,ORC1,PUM2,EHMT2,SIN3A,SUPT5H,DHX9,USP22,CHCHD2,GATA1,STOML2,KLF13,PTBP1,CXXC5,HBP1,NOLC1,RAF1,MTPN,TFDP2,CDK4,PFDN5,NAMPT,CCNT1,RTF1,ZNFX1,CTDSP1,NFIC,ACTN4,MYBL2,DRAP1,SLC39A8,ATF6,EIF3C,CCT3,DNM2,C14ORF166,PRMT5,SHC1,THRAP3,PDS5A,ZNF395,ARID2,RARA,PSMB3,PPRC1,SREBF2,GSTP1,PCBD1,BMPR2,DDX41,C1QBP,EIF4EBP1,PSME1,IKZF5,ZNF142,GATAD2B,DPF2,PRMT1,…
GO:BP	immune response	GO:0006955	754035	9122608209320036	2297	629	145	18017	PAFAH1B2,AP1M1,EZR,FCGR2A,INPP5D,HLA-DRB1,PSMD11,SIN3A,ARMC8,DHX9,ADAR,STOML2,VCP,LAMTOR1,RAF1,PTPN1,GPX1,CAPZA1,QSOX1,KCNAB2,LIMK1,GRB2,SEC61A1,ATP6AP2,OTUB1,TRAPPC1,IFITM2,SHC1,RARA,HLA-DRA,PSMB3,PGAM1,GSTP1,PSAP,RAB5C,RNASE2,C1QBP,PSME1,PHPT1,HSP90AB1,RGCC,TTLL12,PSMB7,AP1G1,CDC37,SIRPA,SHMT2,IRF9,JAK1,ARPC1B,GPS2,PSMB2,CAPN1,CST3,MDK,CTSD,PSMF1,HSP90AA1,BAG6,BRK1,CYBA,CTSZ,BRAF,ACTB,CTSC,CMTM…
GO:BP	regulation of gene expression	GO:0010468	7774.24	9109342127595	5121	629	262	18017	BAZ2A,CHP1,CTNNB1,EZR,ECD,INPP5D,HLA-DRB1,MEPCE,PSMD11,NOP2,ORC1,NUP214,PUM2,EHMT2,SIN3A,SUPT5H,DHX9,ADAR,USP22,CHCHD2,GATA1,KLF13,PTBP1,CXXC5,HBP1,NOLC1,RAF1,MTPN,TFDP2,CDK4,GPX1,PFDN5,NAMPT,DCPS,CCNT1,RTF1,ZNFX1,MYH9,CTDSP1,NFIC,MYBL2,ATP6AP2,DRAP1,SLC39A8,ATF6,EIF3C,DNM2,C14ORF166,PRMT5,SHC1,THRAP3,ZNF395,ARID2,RARA,PSMB3,POLR2H,PPRC1,SREBF2,GSTP1,PCBD1,BMPR2,DDX41,C1QBP,EIF4EBP1,PSME1,IKZF5,Z…
GO:BP	regulation of RNA metabolic process	GO:0051252	90852.3	9041664117541992	3821	629	210	18017	BAZ2A,CHP1,CTNNB1,EZR,ECD,HLA-DRB1,MEPCE,PSMD11,NOP2,ORC1,NUP214,PUM2,EHMT2,SIN3A,SUPT5H,DHX9,USP22,CHCHD2,GATA1,KLF13,PTBP1,CXXC5,HBP1,NOLC1,RAF1,MTPN,TFDP2,PFDN5,NAMPT,CCNT1,RTF1,ZNFX1,CTDSP1,NFIC,ACTN4,MYBL2,DRAP1,SLC39A8,ATF6,DNM2,C14ORF166,PRMT5,SHC1,THRAP3,ZNF395,ARID2,RARA,PSMB3,PPRC1,SREBF2,PCBD1,BMPR2,DDX41,C1QBP,PSME1,IKZF5,ZNF142,GATAD2B,DPF2,SNRPA,ATP2B4,ADNP2,FLOT2,TXNIP,YWHAH,RGCC,P…
GO:BP	protein transport	GO:0015031	97526.3	9010878074383886	2041	629	133	18017	CHP1,AP1M1,EZR,AP2M1,HLA-DRB1,NUP214,ATG3,DHX9,COPE,VCP,TOMM40,NOLC1,RAF1,KPNA4,TFDP2,PTPN1,AP1B1,MYH9,ACTN4,SEC61A1,PLEKHM1,UQCRC2,ARHGAP1,ACSL3,NUMB,DNM2,DERL1,GLUL,GAPVD1,ZDHHC3,NDEL1,ATP6V1B2,TIMM23,MTX1,SREBF2,PSAP,RAB5C,SLC25A5,PHPT1,HSP90AB1,TXNIP,YWHAH,RGCC,HTRA2,AP1G1,RAB35,CDC37,TBC1D9B,GABARAP,CLTC,SRSF9,STRADB,NUP153,HSP90AA1,TNPO3,SFT2D2,RBM22,USP36,ARRDC3,SRSF6,CMTM6,YWHAQ,DDX39A,CH…
GO:BP	cellular protein-containing complex assembly	GO:0034622	1.38689e+07	8857957258015738	1104	629	87	18017	BAZ2A,AP2M1,HLA-DRB1,PSMD11,NOP2,DHX9,ADAR,TRAF7,MTPN,CAPZA1,ZNFX1,GRB2,TSPYL1,EIF3C,ATPAF1,DNM2,PRMT5,SNRPD3,HLA-DRA,NDEL1,RPA1,HSP90AB1,H1FX,MED6,NDUFB9,ARPC1B,AAR2,CLTC,SRSF9,NUP153,HSP90AA1,BRK1,EIF3F,CYBA,EIF4H,MSRB2,EIF5,SRSF6,ASF1B,DDB1,ARPC2,ACTR3,PFN1,CHMP4B,SRSF1,EIF3D,NAP1L4,PSTPIP2,FKBP1A,EIF3A,NAF1,PSMC5,STRAP,EIF3E,MCM5,CORO1A,ARF1,PRPF19,DIAPH1,EIF3M,HLA-DMA,NUP98,HMGB2,EIF3B,SF3A1…
GO:BP	negative regulation of cellular metabolic process	GO:0031324	1.68151e+07	8774300445038316	2728	629	163	18017	BAZ2A,CHP1,CTNNB1,EZR,CASP3,MEPCE,HIPK3,EHMT2,SIN3A,SUPT5H,DHX9,ADAR,GATA1,PTBP1,CXXC5,HBP1,RAF1,TFDP2,PTPN1,GPX1,PFDN5,QSOX1,NAMPT,CCNT1,RTF1,ZNFX1,CTDSP1,GNAQ,LIMK1,NFIC,VDAC1,DRAP1,OTUB1,C14ORF166,PRMT5,SHC1,THRAP3,PDS5A,RARA,PPIF,SREBF2,GSTP1,BMPR2,C1QBP,EIF4EBP1,IKZF5,GPS1,GATAD2B,DPF2,CORO1C,ATP2B4,HSP90AB1,TXNIP,HTRA2,ANKLE2,SIRPA,H1FX,SHMT2,RBM4,CLTC,GPS2,SRSF9,CST3,TNIP1,PSMF1,BAG6,UNK,C…
GO:BP	RNA metabolic process	GO:0016070	1.76319e+07	8753700036780666	4694	629	244	18017	BAZ2A,CHP1,CTNNB1,EZR,ECD,HLA-DRB1,MEPCE,PSMD11,HIPK3,NOP2,ORC1,NUP214,PUM2,EHMT2,SIN3A,SUPT5H,DHX9,ADAR,USP22,CHCHD2,GATA1,KLF13,PTBP1,CXXC5,HBP1,NOLC1,RAF1,MTPN,TFDP2,CDK4,PFDN5,NAMPT,DCPS,CCNT1,RTF1,ZNFX1,CTDSP1,NFIC,ACTN4,MYBL2,DDX24,DRAP1,SLC39A8,ATF6,DNM2,C14ORF166,PRMT5,SHC1,THRAP3,SNRPD3,ZNF395,ARID2,RARA,PSMB3,POLR2H,PPRC1,SREBF2,PCBD1,RNASE2,BMPR2,DDX41,C1QBP,PSME1,IKZF5,ZNF142,GATAD2B,…
GO:BP	ribonucleoprotein complex biogenesis	GO:0022613	1.94614e+07	8710826871212793	442	629	49	18017	NOP2,NUP214,DHX9,ADAR,TRAF7,NOLC1,EIF3C,GLUL,PRMT5,SNRPD3,C1QBP,HSP90AB1,AAR2,SRSF9,HSP90AA1,EBNA1BP2,EIF3F,EIF4H,USP36,EIF5,SRSF6,DROSHA,SRSF1,EIF3D,MYBBP1A,NOP58,EIF3A,NAF1,NOP56,STRAP,EIF3E,NOL11,PRPF19,EXOSC1,EIF3M,EIF3B,WDR55,SF3A1,RPS5,CPSF6,RPL3,EIF3L,SNRPC,PA2G4,DDX39B,NGDN,RPL24,RIOK3,NPM1
GO:BP	organonitrogen compound catabolic process	GO:1901565	2.3366e+07	8631415575185926	1351	629	99	18017	CHP1,CTNNB1,EZR,AP2M1,PSMD11,ARMC8,USP22,VCP,DDA1,GPX1,TPP1,NT5C2,RAD23A,DERL1,GLUL,PSMB3,FAH,PCBD1,PSAP,PSME1,BUB3,ATP2B4,HSP90AB1,PSMB7,HTRA2,SHMT2,BCKDK,TIPARP,PCNP,CLTC,PSMB2,CST3,CTSD,ZNRF1,PSMF1,HSP90AA1,BAG6,CTSZ,USP36,DDB1,CTSC,PHB,HIPK2,UBR4,CHMP4B,ZFAND2A,KCTD10,BCKDHA,RNF130,ODC1,ANAPC16,EDEM1,ANPEP,LDLR,NAGA,XBP1,UBE2G2,PSMC5,TXN2,UBXN1,PRPF19,PSMD7,CD81,SKP2,FLNA,MBD4,FBXW11,TIMP2,CS…
GO:BP	regulation of cellular macromolecule biosynthetic process	GO:2000112	3.68616e+07	8433426115418076	3997	629	215	18017	BAZ2A,CHP1,CTNNB1,EZR,ECD,HLA-DRB1,MEPCE,PSMD11,NOP2,ORC1,PUM2,EHMT2,SIN3A,SUPT5H,DHX9,USP22,CHCHD2,GATA1,STOML2,KLF13,PTBP1,CXXC5,HBP1,NOLC1,RAF1,MTPN,TFDP2,CDK4,PFDN5,NAMPT,CCNT1,RTF1,ZNFX1,CTDSP1,NFIC,MYBL2,DRAP1,SLC39A8,ATF6,EIF3C,CCT3,DNM2,C14ORF166,PRMT5,SHC1,THRAP3,PDS5A,ZNF395,ARID2,RARA,PSMB3,PPRC1,SREBF2,PCBD1,BMPR2,DDX41,C1QBP,EIF4EBP1,PSME1,IKZF5,ZNF142,GATAD2B,DPF2,PRMT1,ATP2B4,ADNP2…
GO:BP	cell death	GO:0008219	3.75555e+07	8425326679953995	2300	629	143	18017	CHP1,CTNNB1,INPP5D,CASP3,HIPK3,ATG3,SIN3A,DHX9,ADAR,GATA1,VCP,TRAF7,RAF1,TFDP2,CDK4,PTPN1,GPX1,NAMPT,DCPS,ITGA5,P4HB,ACTN4,VDAC1,MYBL2,ATF6,FXN,CAPNS1,DNM2,SHC1,RARA,SIGMAR1,ZDHHC3,PPIF,GSTP1,PSAP,SLC25A5,BMPR2,DDX41,C1QBP,AKR1B1,CCND2,FEM1B,DPF2,ADNP2,HSP90AB1,TXNIP,YWHAH,RGCC,HTRA2,ANKLE2,BCL2L1,GHITM,GABARAP,STRADB,CAPN1,MDK,CTSD,GNB1,BAG6,SHB,CTSZ,GNA13,NET1,USP36,SERPINB2,BRAF,SRSF6,DDB1,ILK…
GO:BP	gene expression	GO:0010467	4.22089e+06	8374595671138483	6089	629	296	18017	BAZ2A,CHP1,CTNNB1,EZR,ECD,INPP5D,CASP3,HLA-DRB1,MEPCE,PSMD11,HIPK3,NOP2,ORC1,NUP214,MRPL38,PUM2,EHMT2,SIN3A,SUPT5H,DHX9,ADAR,USP22,CHCHD2,GATA1,STOML2,KLF13,PTBP1,CXXC5,HBP1,NOLC1,RAF1,MTPN,TFDP2,CDK4,GPX1,PFDN5,NAMPT,DCPS,CCNT1,RTF1,ZNFX1,MYH9,CTDSP1,NFIC,MYBL2,ATP6AP2,UQCRC2,DRAP1,SLC39A8,ATF6,EIF3C,FXN,DNM2,C14ORF166,PRMT5,SHC1,THRAP3,SNRPD3,ZNF395,ARID2,RARA,PSMB3,POLR2H,PPRC1,SREBF2,GSTP1,PC…
GO:BP	peptide transport	GO:0015833	4.34375e+06	8362135353812935	2083	629	133	18017	CHP1,AP1M1,EZR,AP2M1,HLA-DRB1,NUP214,ATG3,DHX9,COPE,VCP,TOMM40,NOLC1,RAF1,KPNA4,TFDP2,PTPN1,AP1B1,MYH9,ACTN4,SEC61A1,PLEKHM1,UQCRC2,ARHGAP1,ACSL3,NUMB,DNM2,DERL1,GLUL,GAPVD1,ZDHHC3,NDEL1,ATP6V1B2,TIMM23,MTX1,SREBF2,PSAP,RAB5C,SLC25A5,PHPT1,HSP90AB1,TXNIP,YWHAH,RGCC,HTRA2,AP1G1,RAB35,CDC37,TBC1D9B,GABARAP,CLTC,SRSF9,STRADB,NUP153,HSP90AA1,TNPO3,SFT2D2,RBM22,USP36,ARRDC3,SRSF6,CMTM6,YWHAQ,DDX39A,CH…
GO:BP	macromolecule biosynthetic process	GO:0009059	5.28991e+06	827655172368619	5125	629	259	18017	BAZ2A,CHP1,CTNNB1,EZR,ECD,HLA-DRB1,MEPCE,PSMD11,HIPK3,NOP2,ORC1,MRPL38,PUM2,EHMT2,SIN3A,SUPT5H,DHX9,USP22,CHCHD2,GATA1,STOML2,VCP,KLF13,PTBP1,CXXC5,HBP1,NOLC1,RAF1,MTPN,TFDP2,CDK4,PFDN5,NAMPT,CCNT1,RTF1,ZNFX1,CTDSP1,NFIC,ACTN4,MYBL2,LIG1,DRAP1,SLC39A8,ATF6,EIF3C,CCT3,DNM2,GLUL,C14ORF166,PRMT5,SHC1,THRAP3,SNRPD3,PDS5A,POLD2,RPN2,ZNF395,ARID2,RARA,PSMB3,ZDHHC3,POLR2H,PPRC1,SREBF2,GSTP1,PCBD1,BMPR2,…
GO:BP	organic substance biosynthetic process	GO:1901576	6.34265e+06	8197729559347701	6242	629	301	18017	BAZ2A,CHP1,CTNNB1,EZR,ECD,INPP5D,HLA-DRB1,MEPCE,PSMD11,HIPK3,NOP2,ORC1,MRPL38,PUM2,EHMT2,SIN3A,SUPT5H,DHX9,USP22,CHCHD2,GATA1,STOML2,VCP,KLF13,PTBP1,CXXC5,HBP1,NOLC1,RAF1,MTPN,TFDP2,CDK4,GPX1,PFDN5,NAMPT,CCNT1,PI4KB,RTF1,ZNFX1,CTDSP1,NFIC,ACTN4,MYBL2,NT5C2,LIG1,DRAP1,SLC39A8,SLC25A39,ATF6,EIF3C,ACSL3,FXN,CCT3,DNM2,GLUL,C14ORF166,PRMT5,SHC1,THRAP3,SNRPD3,PDS5A,POLD2,RPN2,ZNF395,ARID2,RARA,PSMB3,PG…
GO:BP	cellular biosynthetic process	GO:0044249	6.98313e+06	815594974788958	6139	629	297	18017	BAZ2A,CHP1,CTNNB1,EZR,ECD,INPP5D,HLA-DRB1,MEPCE,PSMD11,HIPK3,NOP2,ORC1,MRPL38,PUM2,EHMT2,SIN3A,SUPT5H,DHX9,USP22,CHCHD2,GATA1,STOML2,VCP,KLF13,PTBP1,CXXC5,HBP1,NOLC1,RAF1,MTPN,TFDP2,CDK4,GPX1,PFDN5,NAMPT,CCNT1,PI4KB,RTF1,ZNFX1,CTDSP1,NFIC,ACTN4,MYBL2,NT5C2,LIG1,DRAP1,SLC39A8,SLC25A39,ATF6,EIF3C,ACSL3,FXN,CCT3,DNM2,GLUL,C14ORF166,PRMT5,SHC1,THRAP3,SNRPD3,PDS5A,POLD2,RPN2,ZNF395,ARID2,RARA,PSMB3,ZD…
GO:BP	cell cycle	GO:0007049	781182	8107247766577157	1882	629	123	18017	CTNNB1,EZR,ECD,CASP3,MEPCE,PSMD11,ORC1,NUP214,EHMT2,SIN3A,SEPT6,USP22,VCP,SMC1A,HBP1,LAMTOR1,NOLC1,TFDP2,CDK4,CCNT1,MYH9,CTDSP1,MYBL2,LIG1,DNM2,RAD23A,PRMT5,PDS5A,POLD2,RARA,PSMB3,NDEL1,EIF4EBP1,PSME1,CCND2,FEM1B,RPA1,PRMT1,BUB3,ATP2B4,HSP90AB1,TXNIP,RGCC,TTLL12,PSMB7,HTRA2,RAB35,ANKLE2,BCL2L1,CDC37,PCNP,CLTC,PSMB2,STRADB,PSMF1,HSP90AA1,BAG6,DDB1,ACTB,ILK,ACTR3,HIPK2,CHMP4B,GNAI2,STAT3,MASTL,MYBB…
GO:BP	cellular protein catabolic process	GO:0044257	1.16846e+08	7932384581536088	807	629	69	18017	CTNNB1,EZR,AP2M1,PSMD11,ARMC8,USP22,VCP,DDA1,GPX1,RAD23A,DERL1,PSMB3,PSAP,PSME1,BUB3,HSP90AB1,PSMB7,HTRA2,PCNP,CLTC,PSMB2,ZNRF1,PSMF1,HSP90AA1,BAG6,CTSZ,USP36,DDB1,CTSC,HIPK2,UBR4,CHMP4B,ZFAND2A,KCTD10,RNF130,ANAPC16,EDEM1,LDLR,XBP1,UBE2G2,PSMC5,UBXN1,PRPF19,PSMD7,CD81,SKP2,FBXW11,CSNK1A1,PSMB4,SGTA,COPS3,PML,PSMD13,CYLD,SNX5,HSPA5,MTA1,RNF4,UBE2K,ARIH1,SQSTM1,PSME2,RNF216,CTSW,PTK2B,ATRAID,CDC20…
GO:BP	biosynthetic process	GO:0009058	1.25601e+08	790100576137546	6328	629	303	18017	BAZ2A,CHP1,CTNNB1,EZR,ECD,INPP5D,HLA-DRB1,MEPCE,PSMD11,HIPK3,NOP2,ORC1,MRPL38,PUM2,EHMT2,SIN3A,SUPT5H,DHX9,USP22,CHCHD2,GATA1,STOML2,VCP,KLF13,PTBP1,CXXC5,HBP1,NOLC1,RAF1,MTPN,TFDP2,CDK4,GPX1,PFDN5,NAMPT,CCNT1,PI4KB,RTF1,ZNFX1,CTDSP1,NFIC,ACTN4,MYBL2,NT5C2,LIG1,DRAP1,SLC39A8,SLC25A39,ATF6,EIF3C,ACSL3,FXN,CCT3,DNM2,GLUL,C14ORF166,PRMT5,SHC1,THRAP3,SNRPD3,PDS5A,POLD2,RPN2,ZNF395,ARID2,RARA,PSMB3,PG…
GO:BP	amide transport	GO:0042886	1.53982e+07	7812530341036807	2120	629	133	18017	CHP1,AP1M1,EZR,AP2M1,HLA-DRB1,NUP214,ATG3,DHX9,COPE,VCP,TOMM40,NOLC1,RAF1,KPNA4,TFDP2,PTPN1,AP1B1,MYH9,ACTN4,SEC61A1,PLEKHM1,UQCRC2,ARHGAP1,ACSL3,NUMB,DNM2,DERL1,GLUL,GAPVD1,ZDHHC3,NDEL1,ATP6V1B2,TIMM23,MTX1,SREBF2,PSAP,RAB5C,SLC25A5,PHPT1,HSP90AB1,TXNIP,YWHAH,RGCC,HTRA2,AP1G1,RAB35,CDC37,TBC1D9B,GABARAP,CLTC,SRSF9,STRADB,NUP153,HSP90AA1,TNPO3,SFT2D2,RBM22,USP36,ARRDC3,SRSF6,CMTM6,YWHAQ,DDX39A,CH…
GO:BP	cellular component biogenesis	GO:0044085	1.74033e+08	7759369017999355	3230	629	181	18017	BAZ2A,CHP1,CTNNB1,EZR,AP2M1,HLA-DRB1,PSMD11,NOP2,NUP214,ATG3,PUM2,EHMT2,SEPT6,DHX9,ADAR,STOML2,VCP,SMC1A,TRAF7,NOLC1,RAF1,MTPN,CAPZA1,QSOX1,ZNFX1,LIMK1,ITGA5,P4HB,ACTN4,GRB2,TSPYL1,MYBL2,PLEKHM1,EIF3C,ACSL3,FXN,TRAPPC1,ATPAF1,CCT3,DNM2,GLUL,PRMT5,SNRPD3,SIGMAR1,HLA-DRA,NDEL1,PSAP,C1QBP,EIF4EBP1,VMP1,RPA1,PRMT1,CORO1C,FLOT2,HSP90AB1,RGCC,TRAPPC10,H1FX,MED6,SHMT2,NDUFB9,ARPC1B,GABARAP,AAR2,MAP1LC3B…
GO:BP	cellular macromolecule biosynthetic process	GO:0034645	2.37442e+08	7624441848623874	4984	629	251	18017	BAZ2A,CHP1,CTNNB1,EZR,ECD,HLA-DRB1,MEPCE,PSMD11,HIPK3,NOP2,ORC1,MRPL38,PUM2,EHMT2,SIN3A,SUPT5H,DHX9,USP22,CHCHD2,GATA1,STOML2,VCP,KLF13,PTBP1,CXXC5,HBP1,NOLC1,RAF1,MTPN,TFDP2,CDK4,PFDN5,NAMPT,CCNT1,RTF1,ZNFX1,CTDSP1,NFIC,MYBL2,LIG1,DRAP1,SLC39A8,ATF6,EIF3C,CCT3,DNM2,GLUL,C14ORF166,PRMT5,SHC1,THRAP3,SNRPD3,PDS5A,POLD2,RPN2,ZNF395,ARID2,RARA,PSMB3,ZDHHC3,POLR2H,PPRC1,SREBF2,PCBD1,BMPR2,DDX41,C1QBP,…
GO:BP	transport	GO:0006810	2.56725e+07	7590532293781106	5299	629	263	18017	CHP1,PAFAH1B2,AP1M1,CTNNB1,EZR,FCGR2A,AP2M1,HLA-DRB1,PSMD11,NUP214,ATG3,ARMC8,DHX9,COPE,STOML2,VCP,PDLIM7,LAMTOR1,TOMM40,NOLC1,RAF1,KPNA4,TFDP2,PTPN1,CAPZA1,QSOX1,KCNAB2,AP1B1,HDLBP,PI4KB,MYH9,LIMK1,ACTN4,GRB2,SEC61A1,VDAC1,PLEKHM1,ATP6AP2,SLC20A1,UQCRC2,SLC39A8,ARHGAP1,SLC25A39,ACSL3,FXN,NUMB,TRAPPC1,CCT3,DNM2,DERL1,GLUL,C14ORF166,SNRPD3,RARA,SIGMAR1,PSMB3,GAPVD1,PGAM1,ZDHHC3,NDEL1,ATP6V1B2,TIMM…
GO:BP	regulation of cell death	GO:0010941	2.64496e+08	7.57758e+16	1765	629	116	18017	CHP1,CTNNB1,INPP5D,CASP3,HIPK3,SIN3A,ADAR,GATA1,VCP,TRAF7,RAF1,TFDP2,CDK4,PTPN1,GPX1,DCPS,ITGA5,P4HB,ACTN4,MYBL2,ATF6,FXN,DNM2,SHC1,RARA,SIGMAR1,PPIF,GSTP1,PSAP,SLC25A5,C1QBP,AKR1B1,CCND2,FEM1B,ADNP2,HSP90AB1,TXNIP,YWHAH,RGCC,HTRA2,ANKLE2,BCL2L1,STRADB,MDK,CTSD,BAG6,CTSZ,GNA13,NET1,USP36,SERPINB2,BRAF,SRSF6,DDB1,ILK,CTSC,YWHAQ,PHB,MYD88,HIPK2,CHMP4B,FOXP1,GNAI2,TNFRSF1A,STAT3,ARL6IP1,SPATA2,MYBBP…
GO:BP	positive regulation of nucleobase-containing compound metabolic process	GO:0045935	3.02951e+08	7518628078379313	1942	629	124	18017	CTNNB1,ECD,HLA-DRB1,MEPCE,SIN3A,SUPT5H,DHX9,USP22,CHCHD2,GATA1,VCP,KLF13,NOLC1,RAF1,TFDP2,NAMPT,CCNT1,NFIC,ACTN4,MYBL2,ATF6,CCT3,DNM2,C14ORF166,SHC1,THRAP3,ARID2,RARA,PPRC1,SREBF2,PCBD1,BMPR2,DDX41,IKZF5,DPF2,HSP90AB1,YWHAH,RGCC,H1FX,MED6,WBP2,SUPT7L,GPS2,PBX2,MDK,TNIP1,KLF6,HSP90AA1,SOX12,IER5,RBM22,ARNT,ILK,KHSRP,MAP2K3,PHB,ACTR3,HIPK2,PFN1,ARID4B,TNFRSF1A,STAT3,YBX1,SMARCC2,JUNB,NAF1,ENO1,ATF4…
GO:BP	antigen processing and presentation of exogenous peptide antigen	GO:0002478	3.14315e+07	7.50263e+16	174	629	28	18017	AP1M1,AP2M1,HLA-DRB1,PSMD11,CAPZA1,AP1B1,DNM2,HLA-DRA,PSMB3,PSME1,PSMB7,AP1G1,CLTC,PSMB2,CTSD,PSMF1,CYBA,HLA-DPA1,PSMC5,ARF1,PSMD7,HLA-DMA,IFI30,PSMB4,PSMD13,DCTN5,PSME2,PSMD2
GO:BP	regulation of biological quality	GO:0065008	3.17219e+07	7498641246347642	4133	629	217	18017	CHP1,CTNNB1,EZR,INPP5D,AP2M1,CASP3,HLA-DRB1,PSMD11,NUP214,PUM2,SIN3A,DHX9,ADAR,GATA1,STOML2,VCP,KLF13,LAMTOR1,RAF1,MTPN,TFDP2,CDK4,GPX1,CAPZA1,QSOX1,TPP1,NAMPT,KCNAB2,MYH9,GNAQ,LIMK1,P4HB,GRB2,PLEKHM1,ATP6AP2,SLC39A8,FXN,NUMB,CCT3,DNM2,RAD23A,DERL1,GLUL,THRAP3,POLD2,ARID2,RARA,PSMB3,NDEL1,ATP6V1B2,FIBP,PPIF,MTX1,SREBF2,GSTP1,SLC25A5,BMPR2,C1QBP,PSME1,AKR1B1,YLPM1,PHPT1,RPA1,PRMT1,ATP2B4,FLOT2,HSP…
GO:BP	apoptotic process	GO:0006915	3.62233e+07	7441011821475954	2013	629	127	18017	CTNNB1,INPP5D,CASP3,HIPK3,ATG3,SIN3A,ADAR,GATA1,VCP,TRAF7,RAF1,TFDP2,CDK4,PTPN1,GPX1,ITGA5,P4HB,ACTN4,VDAC1,MYBL2,ATF6,FXN,DNM2,SHC1,RARA,SIGMAR1,ZDHHC3,PPIF,GSTP1,SLC25A5,BMPR2,DDX41,C1QBP,AKR1B1,CCND2,FEM1B,DPF2,HSP90AB1,TXNIP,YWHAH,RGCC,HTRA2,ANKLE2,BCL2L1,GHITM,GABARAP,STRADB,MDK,CTSD,GNB1,BAG6,SHB,CTSZ,GNA13,NET1,USP36,SERPINB2,BRAF,SRSF6,DDB1,ILK,CTSC,YWHAQ,PHB,MYD88,HIPK2,FOXP1,GNAI2,TNFRS…
GO:BP	exocytosis	GO:0006887	3.66028e+07	7436485315498304	902	629	73	18017	CHP1,PAFAH1B2,AP1M1,FCGR2A,PSMD11,ARMC8,VCP,LAMTOR1,QSOX1,KCNAB2,MYH9,ACTN4,ATP6AP2,TRAPPC1,PGAM1,GSTP1,PSAP,RAB5C,RNASE2,HSP90AB1,PSMB7,AP1G1,SIRPA,ARHGAP17,CAPN1,CST3,CTSD,HSP90AA1,CYBA,CTSZ,BRAF,CTSC,CMTM6,BIN2,UBR4,GNAI2,ARL8A,SYK,GGH,GRN,STX11,FGR,ANPEP,TYROBP,CORO1A,ARF1,PDPK1,ITGB2,PSMD7,RAC2,DIAPH1,FLNA,CDK13,VAPA,GATA2,TIMP2,SURF4,PSMD13,PTPN6,TNFRSF1B,GM2A,GDI2,IST1,NCSTN,PA2G4,CTSA,ILF…
GO:BP	cytokine-mediated signaling pathway	GO:0019221	3.86015e+07	7413395341885631	810	629	68	18017	INPP5D,CASP3,HLA-DRB1,PSMD11,ADAR,PTPN1,CAPZA1,P4HB,ACTN4,GRB2,IFITM2,SHC1,HLA-DRA,PSMB3,GSTP1,PSME1,HSP90AB1,TTLL12,PSMB7,BCL2L1,CDC37,TALDO1,IRF9,JAK1,GPS2,PSMB2,FSCN1,PSMF1,HSP90AA1,SERPINB2,ILK,MYD88,TNFRSF1A,STAT3,SPATA2,SYK,JUNB,IFNAR2,HLA-DPA1,CSF3R,PSMC5,ARF1,ITGB2,PSMD7,FOXO3,IFITM1,FBXW11,MCL1,IFITM3,ADIPOR1,IFI30,PSMB4,RIPK2,PML,PSMD13,PTPN6,CYLD,IL2RG,TNFRSF1B,UBE2K,FOXO1,SNRPA1,IL17R…
GO:BP	mitotic cell cycle process	GO:1903047	4.99354e+07	7301591136615193	908	629	73	18017	ECD,MEPCE,PSMD11,ORC1,SIN3A,SEPT6,VCP,SMC1A,TFDP2,CDK4,CTDSP1,MYBL2,LIG1,DNM2,PRMT5,PDS5A,PSMB3,NDEL1,EIF4EBP1,PSME1,CCND2,RPA1,PRMT1,BUB3,RGCC,PSMB7,RAB35,ANKLE2,BCL2L1,CLTC,PSMB2,PSMF1,HSP90AA1,DDB1,CHMP4B,MASTL,KHDRBS1,JTB,ANAPC16,NSL1,CCNB2,RAE1,PSMC5,MCM5,ARF1,PSMD7,SSNA1,SKP2,FLNA,FBXW11,PIM2,CDK13,CTDNEP1,PSMB4,EP300,PLAGL1,PML,PSMD13,PTPN6,RHOB,MAD2L1BP,PPP1R10,CCNH,PPP2CA,PSME2,CTDSP2,CH…
GO:BP	vesicle-mediated transport	GO:0016192	5.04916e+07	7296780698419111	2156	629	133	18017	CHP1,PAFAH1B2,AP1M1,CTNNB1,EZR,FCGR2A,AP2M1,PSMD11,ATG3,ARMC8,COPE,VCP,PDLIM7,LAMTOR1,PTPN1,CAPZA1,QSOX1,KCNAB2,AP1B1,PI4KB,MYH9,LIMK1,ACTN4,GRB2,ATP6AP2,ARHGAP1,ACSL3,NUMB,TRAPPC1,DNM2,RARA,GAPVD1,PGAM1,GSTP1,PSAP,RAB5C,RNASE2,C1ORF43,CORO1C,HSP90AB1,PSMB7,AP1G1,RAB35,BCL2L1,SIRPA,TRAPPC10,ARPC1B,ARHGAP17,CLTC,ERGIC3,CAPN1,CST3,CTSD,HSP90AA1,BRK1,SFT2D2,CYBA,CTSZ,BRAF,ACTB,ANKRD13A,CTSC,CMTM6,BI…
GO:BP	programmed cell death	GO:0012501	5.38685e+07	72686648932245	2158	629	133	18017	CTNNB1,INPP5D,CASP3,HIPK3,ATG3,SIN3A,DHX9,ADAR,GATA1,VCP,TRAF7,RAF1,TFDP2,CDK4,PTPN1,GPX1,DCPS,ITGA5,P4HB,ACTN4,VDAC1,MYBL2,ATF6,FXN,CAPNS1,DNM2,SHC1,RARA,SIGMAR1,ZDHHC3,PPIF,GSTP1,SLC25A5,BMPR2,DDX41,C1QBP,AKR1B1,CCND2,FEM1B,DPF2,HSP90AB1,TXNIP,YWHAH,RGCC,HTRA2,ANKLE2,BCL2L1,GHITM,GABARAP,STRADB,CAPN1,MDK,CTSD,GNB1,BAG6,SHB,CTSZ,GNA13,NET1,USP36,SERPINB2,BRAF,SRSF6,DDB1,ILK,CTSC,YWHAQ,PHB,MYD88,…
GO:BP	localization	GO:0051179	5.7158e+08	7.24292e+16	6920	629	322	18017	CHP1,PAFAH1B2,AP1M1,CTNNB1,EZR,FCGR2A,INPP5D,AP2M1,HLA-DRB1,MEPCE,PSMD11,NUP214,ATG3,SIN3A,SEPT6,ARMC8,DHX9,COPE,STOML2,VCP,PDLIM7,LAMTOR1,TOMM40,NOLC1,RAF1,KPNA4,TFDP2,PTPN1,GPX1,CAPZA1,QSOX1,TPP1,KCNAB2,AP1B1,HDLBP,PI4KB,MYH9,LIMK1,ITGA5,ACTN4,GRB2,SEC61A1,VDAC1,BSG,PLEKHM1,ATP6AP2,SLC20A1,UQCRC2,SLC39A8,ARHGAP1,SLC25A39,ACSL3,FXN,NUMB,TRAPPC1,CCT3,CUTA,DNM2,DERL1,GLUL,C14ORF166,SHC1,SNRPD3,ARI…
GO:BP	establishment of localization	GO:0051234	7.50638e+06	7124569719414913	5427	629	266	18017	CHP1,PAFAH1B2,AP1M1,CTNNB1,EZR,FCGR2A,AP2M1,HLA-DRB1,PSMD11,NUP214,ATG3,ARMC8,DHX9,COPE,STOML2,VCP,PDLIM7,LAMTOR1,TOMM40,NOLC1,RAF1,KPNA4,TFDP2,PTPN1,CAPZA1,QSOX1,KCNAB2,AP1B1,HDLBP,PI4KB,MYH9,LIMK1,ACTN4,GRB2,SEC61A1,VDAC1,PLEKHM1,ATP6AP2,SLC20A1,UQCRC2,SLC39A8,ARHGAP1,SLC25A39,ACSL3,FXN,NUMB,TRAPPC1,CCT3,DNM2,DERL1,GLUL,C14ORF166,SNRPD3,RARA,SIGMAR1,PSMB3,GAPVD1,PGAM1,ZDHHC3,NDEL1,ATP6V1B2,TIMM…
GO:BP	antigen processing and presentation of exogenous antigen	GO:0019884	9.46822e+07	7023731770361327	182	629	28	18017	AP1M1,AP2M1,HLA-DRB1,PSMD11,CAPZA1,AP1B1,DNM2,HLA-DRA,PSMB3,PSME1,PSMB7,AP1G1,CLTC,PSMB2,CTSD,PSMF1,CYBA,HLA-DPA1,PSMC5,ARF1,PSMD7,HLA-DMA,IFI30,PSMB4,PSMD13,DCTN5,PSME2,PSMD2
GO:BP	mitotic cell cycle	GO:0000278	9.60901e+07	7017321520497541	1056	629	80	18017	CTNNB1,ECD,MEPCE,PSMD11,ORC1,NUP214,SIN3A,SEPT6,USP22,VCP,SMC1A,NOLC1,TFDP2,CDK4,CTDSP1,MYBL2,LIG1,DNM2,PRMT5,PDS5A,PSMB3,NDEL1,EIF4EBP1,PSME1,CCND2,RPA1,PRMT1,BUB3,RGCC,TTLL12,PSMB7,RAB35,ANKLE2,BCL2L1,CLTC,PSMB2,PSMF1,HSP90AA1,DDB1,CHMP4B,MASTL,KHDRBS1,JTB,ANAPC16,NSL1,CCNB2,RAE1,PSMC5,MCM5,ARF1,PSMD7,SSNA1,SKP2,FLNA,FBXW11,PIM2,CDK13,TIMP2,CTDNEP1,PSMB4,EP300,PLAGL1,PML,PSMD13,PTPN6,RHOB,CYLD,…
GO:BP	immune response-activating cell surface receptor signaling pathway	GO:0002429	1.00329e+09	6.99857e+16	476	629	48	18017	EZR,FCGR2A,INPP5D,HLA-DRB1,PSMD11,STOML2,RAF1,LIMK1,GRB2,HLA-DRA,PSMB3,PSME1,PHPT1,HSP90AB1,PSMB7,ARPC1B,GPS2,PSMB2,PSMF1,HSP90AA1,BAG6,BRK1,BRAF,ACTB,ARPC2,ACTR3,FOXP1,SYK,KHDRBS1,FGR,HLA-DPA1,KCNN4,PSMC5,PDPK1,PSMD7,ICAM2,CD81,FBXW11,LILRB4,PSMB4,RIPK2,EP300,PSMD13,PTPN6,CYLD,PSME2,WASF2,PSMD2
GO:BP	immune response-activating signal transduction	GO:0002757	1.00329e+09	6.99857e+16	476	629	48	18017	EZR,FCGR2A,INPP5D,HLA-DRB1,PSMD11,STOML2,RAF1,LIMK1,GRB2,HLA-DRA,PSMB3,PSME1,PHPT1,HSP90AB1,PSMB7,ARPC1B,GPS2,PSMB2,PSMF1,HSP90AA1,BAG6,BRK1,BRAF,ACTB,ARPC2,ACTR3,FOXP1,SYK,KHDRBS1,FGR,HLA-DPA1,KCNN4,PSMC5,PDPK1,PSMD7,ICAM2,CD81,FBXW11,LILRB4,PSMB4,RIPK2,EP300,PSMD13,PTPN6,CYLD,PSME2,WASF2,PSMD2
GO:BP	regulation of immune response	GO:0050776	1.00728e+09	6996850109030506	1018	629	78	18017	EZR,FCGR2A,INPP5D,HLA-DRB1,PSMD11,SIN3A,DHX9,ADAR,STOML2,RAF1,PTPN1,GPX1,LIMK1,GRB2,SHC1,RARA,HLA-DRA,PSMB3,C1QBP,PSME1,PHPT1,HSP90AB1,RGCC,TTLL12,PSMB7,AP1G1,CDC37,JAK1,ARPC1B,GPS2,PSMB2,PSMF1,HSP90AA1,BAG6,BRK1,BRAF,ACTB,ARPC2,PHB,ACTR3,FOXP1,SYK,KHDRBS1,FKBP1A,GRN,FGR,IFNAR2,HLA-DPA1,KCNN4,TYROBP,XBP1,PSMC5,PDPK1,ITGB2,PSMD7,ICAM2,RAC2,CD81,SLC7A5,IFITM1,FBXW11,LILRB4,HMGB2,GATA2,PSMB4,RIPK2,E…
GO:BP	negative regulation of gene expression	GO:0010629	1.01417e+09	6993888257577457	2404	629	143	18017	BAZ2A,CTNNB1,EZR,INPP5D,HLA-DRB1,MEPCE,PSMD11,NUP214,PUM2,EHMT2,SIN3A,SUPT5H,DHX9,ADAR,GATA1,PTBP1,CXXC5,HBP1,TFDP2,PFDN5,DCPS,CCNT1,RTF1,ZNFX1,NFIC,DRAP1,SHC1,THRAP3,RARA,PSMB3,POLR2H,SREBF2,GSTP1,C1QBP,EIF4EBP1,PSME1,IKZF5,GATAD2B,DPF2,ATP2B4,FLOT2,HSP90AB1,TXNIP,RGCC,PSMB7,SIRPA,H1FX,SHMT2,RBM4,TIPARP,GPS2,PSMB2,SRSF9,NUP153,PSMF1,UNK,CTSZ,SRSF6,KHSRP,PHF12,YWHAQ,DROSHA,PHB,MYD88,HIPK2,FOXP1,S…
GO:BP	positive regulation of response to stimulus	GO:0048584	1.12139e+09	6950244705898248	2476	629	146	18017	CTNNB1,EZR,FCGR2A,INPP5D,HLA-DRB1,PSMD11,PUM2,SIN3A,DHX9,STOML2,VCP,PTBP1,TRAF7,CXXC5,LAMTOR1,RAF1,TFDP2,PTPN1,GPX1,LIMK1,ITGA5,ACTN4,GRB2,ATP6AP2,SLC20A1,ATF6,PRMT5,SHC1,ARID2,RARA,HLA-DRA,PSMB3,NDEL1,PPIF,PSAP,BMPR2,C1QBP,PSME1,AKR1B1,EEF1D,PHPT1,PRMT1,HSP90AB1,YWHAH,RGCC,PSMB7,HTRA2,AP1G1,BCL2L1,WBP2,ARPC1B,GPS2,LRRC59,PSMB2,MDK,TNIP1,PSMF1,HSP90AA1,BAG6,PIK3AP1,IER5,BRK1,CYBA,NET1,ARNT,BRAF,A…
GO:BP	regulation of programmed cell death	GO:0043067	1.14161e+09	6942481066914283	1634	629	108	18017	CTNNB1,INPP5D,CASP3,HIPK3,SIN3A,ADAR,GATA1,VCP,TRAF7,RAF1,TFDP2,CDK4,PTPN1,GPX1,DCPS,ITGA5,P4HB,ACTN4,MYBL2,ATF6,FXN,DNM2,SHC1,RARA,SIGMAR1,PPIF,GSTP1,SLC25A5,C1QBP,AKR1B1,CCND2,FEM1B,HSP90AB1,TXNIP,YWHAH,RGCC,HTRA2,ANKLE2,BCL2L1,STRADB,MDK,CTSD,BAG6,CTSZ,GNA13,NET1,USP36,SERPINB2,BRAF,SRSF6,DDB1,ILK,CTSC,YWHAQ,PHB,MYD88,HIPK2,FOXP1,GNAI2,TNFRSF1A,ARL6IP1,SPATA2,MYBBP1A,SYK,GRN,PRDX3,ENO1,PPP1CA,…
GO:BP	negative regulation of nitrogen compound metabolic process	GO:0051172	1.19062e+09	6924227027935795	2524	629	148	18017	BAZ2A,CHP1,CTNNB1,EZR,CASP3,MEPCE,HIPK3,EHMT2,SIN3A,SUPT5H,DHX9,ADAR,GATA1,PTBP1,CXXC5,HBP1,RAF1,TFDP2,PTPN1,GPX1,PFDN5,CCNT1,RTF1,ZNFX1,CTDSP1,GNAQ,LIMK1,NFIC,DRAP1,OTUB1,C14ORF166,PRMT5,SHC1,THRAP3,RARA,SREBF2,GSTP1,BMPR2,C1QBP,EIF4EBP1,IKZF5,GPS1,GATAD2B,DPF2,CORO1C,ATP2B4,FLOT2,HSP90AB1,TXNIP,SIRPA,H1FX,SHMT2,RBM4,CLTC,GPS2,SRSF9,CST3,TNIP1,PSMF1,BAG6,UNK,CTSZ,SERPINB2,SRSF6,ILK,KHSRP,PHF12,Y…
GO:BP	regulation of cellular response to stress	GO:0080135	1.81462e+09	6741213479288017	783	629	65	18017	CTNNB1,EZR,HIPK3,NUP214,DHX9,PPP4C,CHCHD2,PTPN1,GPX1,NAMPT,P4HB,ATF6,OTUB1,ARID2,NDEL1,GSTP1,PSAP,FEM1B,RPA1,PRMT1,HSP90AB1,CERS2,HTRA2,BCL2L1,SIRPA,GPS2,NUP153,HSP90AA1,BAG6,IER5,BRAF,MYD88,HIPK2,SYK,TXN,YBX1,GRN,EDEM1,ENO1,ATF4,RAE1,XBP1,UBE2G2,UBXN1,SPRED2,NUP98,FOXO3,MCL1,LPCAT3,ZEB2,RIPK2,SGTA,EP300,KAT7,PML,CYLD,HSPA5,FOXO1,PPP1R10,DDX39B,REST,PTK2B,HSPB1,SMCHD1,NPM1
GO:BP	positive regulation of immune system process	GO:0002684	2.13095e+09	6671426951246098	1113	629	82	18017	EZR,FCGR2A,INPP5D,HLA-DRB1,PSMD11,PUM2,SIN3A,DHX9,GATA1,STOML2,RAF1,LIMK1,GRB2,RARA,HLA-DRA,PSMB3,C1QBP,PSME1,PHPT1,PRMT1,FLOT2,HSP90AB1,RGCC,PSMB7,AP1G1,SIRPA,ARPC1B,GPS2,PSMB2,MDK,PSMF1,HSP90AA1,SOX12,BAG6,BRK1,ARNT,BRAF,ACTB,CTSC,ARPC2,PHB,ACTR3,MYD88,FOXP1,STAT3,SYK,KHDRBS1,FGR,HLA-DPA1,KCNN4,TYROBP,XBP1,PSMC5,CORO1A,RHOH,PDPK1,ITGB2,PSMD7,ICAM2,RAC2,CD81,SLC7A5,FOXO3,FBXW11,LILRB4,HMGB2,GATA…
GO:BP	heterocycle biosynthetic process	GO:0018130	2.18149e+09	6661245857200152	4240	629	218	18017	BAZ2A,CHP1,CTNNB1,EZR,ECD,HLA-DRB1,MEPCE,PSMD11,HIPK3,NOP2,ORC1,EHMT2,SIN3A,SUPT5H,DHX9,USP22,CHCHD2,GATA1,STOML2,VCP,KLF13,CXXC5,HBP1,NOLC1,RAF1,MTPN,TFDP2,CDK4,GPX1,PFDN5,NAMPT,CCNT1,RTF1,ZNFX1,CTDSP1,NFIC,ACTN4,MYBL2,NT5C2,LIG1,DRAP1,SLC39A8,SLC25A39,ATF6,ACSL3,FXN,CCT3,DNM2,C14ORF166,PRMT5,SHC1,THRAP3,SNRPD3,POLD2,ZNF395,ARID2,RARA,PSMB3,POLR2H,PPRC1,SREBF2,PCBD1,BMPR2,DDX41,C1QBP,PSME1,IKZF5…
GO:BP	T cell receptor signaling pathway	GO:0050852	2.67466e+09	6572731829399925	203	629	29	18017	EZR,INPP5D,HLA-DRB1,PSMD11,STOML2,HLA-DRA,PSMB3,PSME1,PHPT1,PSMB7,PSMB2,PSMF1,BRAF,KHDRBS1,HLA-DPA1,KCNN4,PSMC5,PDPK1,PSMD7,CD81,FBXW11,LILRB4,PSMB4,RIPK2,PSMD13,PTPN6,CYLD,PSME2,PSMD2
GO:BP	aromatic compound biosynthetic process	GO:0019438	2.74073e+09	6562133093338833	4250	629	218	18017	BAZ2A,CHP1,CTNNB1,EZR,ECD,HLA-DRB1,MEPCE,PSMD11,HIPK3,NOP2,ORC1,EHMT2,SIN3A,SUPT5H,DHX9,USP22,CHCHD2,GATA1,STOML2,VCP,KLF13,CXXC5,HBP1,NOLC1,RAF1,MTPN,TFDP2,CDK4,GPX1,PFDN5,NAMPT,CCNT1,RTF1,ZNFX1,CTDSP1,NFIC,ACTN4,MYBL2,NT5C2,LIG1,DRAP1,SLC39A8,SLC25A39,ATF6,ACSL3,FXN,CCT3,DNM2,C14ORF166,PRMT5,SHC1,THRAP3,SNRPD3,POLD2,ZNF395,ARID2,RARA,PSMB3,POLR2H,PPRC1,SREBF2,PCBD1,BMPR2,DDX41,C1QBP,PSME1,IKZF5…
GO:BP	nitrogen compound transport	GO:0071705	2.95339e+08	6529679265443778	2440	629	143	18017	CHP1,AP1M1,EZR,AP2M1,HLA-DRB1,NUP214,ATG3,DHX9,COPE,VCP,TOMM40,NOLC1,RAF1,KPNA4,TFDP2,PTPN1,AP1B1,MYH9,ACTN4,SEC61A1,PLEKHM1,UQCRC2,ARHGAP1,SLC25A39,ACSL3,NUMB,DNM2,DERL1,GLUL,C14ORF166,GAPVD1,ZDHHC3,NDEL1,ATP6V1B2,TIMM23,MTX1,SREBF2,PSAP,RAB5C,SLC25A5,PHPT1,HSP90AB1,TXNIP,YWHAH,RGCC,HTRA2,AP1G1,RAB35,CDC37,TBC1D9B,GABARAP,CLTC,SRSF9,STRADB,NUP153,HSP90AA1,TNPO3,SFT2D2,CYBA,RBM22,USP36,ARRDC3,SRS…
GO:BP	immune response-regulating cell surface receptor signaling pathway	GO:0002768	3.2046e+08	6494226798609595	509	629	49	18017	EZR,FCGR2A,INPP5D,HLA-DRB1,PSMD11,STOML2,RAF1,LIMK1,GRB2,SHC1,HLA-DRA,PSMB3,PSME1,PHPT1,HSP90AB1,PSMB7,ARPC1B,GPS2,PSMB2,PSMF1,HSP90AA1,BAG6,BRK1,BRAF,ACTB,ARPC2,ACTR3,FOXP1,SYK,KHDRBS1,FGR,HLA-DPA1,KCNN4,PSMC5,PDPK1,PSMD7,ICAM2,CD81,FBXW11,LILRB4,PSMB4,RIPK2,EP300,PSMD13,PTPN6,CYLD,PSME2,WASF2,PSMD2
GO:BP	antigen processing and presentation of peptide antigen	GO:0048002	3.43827e+09	6463659961406143	192	629	28	18017	AP1M1,AP2M1,HLA-DRB1,PSMD11,CAPZA1,AP1B1,DNM2,HLA-DRA,PSMB3,PSME1,PSMB7,AP1G1,CLTC,PSMB2,CTSD,PSMF1,CYBA,HLA-DPA1,PSMC5,ARF1,PSMD7,HLA-DMA,IFI30,PSMB4,PSMD13,DCTN5,PSME2,PSMD2
GO:BP	positive regulation of RNA metabolic process	GO:0051254	3.4533e+07	6461766245288461	1773	629	113	18017	CTNNB1,ECD,HLA-DRB1,MEPCE,SIN3A,SUPT5H,DHX9,USP22,CHCHD2,GATA1,KLF13,NOLC1,RAF1,TFDP2,NAMPT,CCNT1,NFIC,ACTN4,MYBL2,ATF6,DNM2,C14ORF166,SHC1,THRAP3,RARA,PPRC1,SREBF2,PCBD1,BMPR2,DDX41,IKZF5,DPF2,YWHAH,RGCC,H1FX,MED6,WBP2,SUPT7L,GPS2,PBX2,MDK,TNIP1,KLF6,SOX12,IER5,RBM22,ARNT,ILK,KHSRP,MAP2K3,PHB,ACTR3,HIPK2,PFN1,ARID4B,TNFRSF1A,STAT3,YBX1,SMARCC2,JUNB,ATF4,XBP1,PSMC5,JUND,PRDM10,CAMTA2,NOL11,PRPF19…
GO:BP	immune response-regulating signaling pathway	GO:0002764	3.93114e+09	6405481715266565	512	629	49	18017	EZR,FCGR2A,INPP5D,HLA-DRB1,PSMD11,STOML2,RAF1,LIMK1,GRB2,SHC1,HLA-DRA,PSMB3,PSME1,PHPT1,HSP90AB1,PSMB7,ARPC1B,GPS2,PSMB2,PSMF1,HSP90AA1,BAG6,BRK1,BRAF,ACTB,ARPC2,ACTR3,FOXP1,SYK,KHDRBS1,FGR,HLA-DPA1,KCNN4,PSMC5,PDPK1,PSMD7,ICAM2,CD81,FBXW11,LILRB4,PSMB4,RIPK2,EP300,PSMD13,PTPN6,CYLD,PSME2,WASF2,PSMD2
GO:BP	cellular component assembly	GO:0022607	3.96279e+09	6401999282829485	2989	629	166	18017	BAZ2A,CHP1,CTNNB1,EZR,AP2M1,HLA-DRB1,PSMD11,NOP2,ATG3,PUM2,EHMT2,SEPT6,DHX9,ADAR,STOML2,VCP,SMC1A,TRAF7,RAF1,MTPN,CAPZA1,QSOX1,ZNFX1,LIMK1,ITGA5,P4HB,ACTN4,GRB2,TSPYL1,MYBL2,PLEKHM1,EIF3C,ACSL3,FXN,TRAPPC1,ATPAF1,CCT3,DNM2,PRMT5,SNRPD3,SIGMAR1,HLA-DRA,NDEL1,PSAP,C1QBP,EIF4EBP1,VMP1,RPA1,PRMT1,CORO1C,FLOT2,HSP90AB1,RGCC,TRAPPC10,H1FX,MED6,SHMT2,NDUFB9,ARPC1B,GABARAP,AAR2,MAP1LC3B2,CLTC,SRSF9,FSCN1…
GO:BP	activation of immune response	GO:0002253	4.37928e+09	6358597481932322	565	629	52	18017	EZR,FCGR2A,INPP5D,HLA-DRB1,PSMD11,SIN3A,STOML2,RAF1,LIMK1,GRB2,HLA-DRA,PSMB3,C1QBP,PSME1,PHPT1,HSP90AB1,RGCC,PSMB7,ARPC1B,GPS2,PSMB2,PSMF1,HSP90AA1,BAG6,BRK1,BRAF,ACTB,ARPC2,PHB,ACTR3,FOXP1,SYK,KHDRBS1,FGR,HLA-DPA1,KCNN4,PSMC5,PDPK1,PSMD7,ICAM2,CD81,FBXW11,LILRB4,PSMB4,RIPK2,EP300,PSMD13,PTPN6,CYLD,PSME2,WASF2,PSMD2
GO:BP	regulation of apoptotic process	GO:0042981	4.52523e+08	6344359336574431	1608	629	105	18017	CTNNB1,INPP5D,CASP3,HIPK3,SIN3A,ADAR,GATA1,VCP,TRAF7,RAF1,TFDP2,CDK4,PTPN1,GPX1,ITGA5,P4HB,ACTN4,MYBL2,ATF6,FXN,DNM2,SHC1,RARA,SIGMAR1,PPIF,GSTP1,SLC25A5,C1QBP,AKR1B1,CCND2,FEM1B,HSP90AB1,TXNIP,YWHAH,RGCC,HTRA2,ANKLE2,BCL2L1,STRADB,MDK,CTSD,BAG6,CTSZ,GNA13,NET1,USP36,SERPINB2,BRAF,SRSF6,DDB1,ILK,CTSC,YWHAQ,PHB,MYD88,HIPK2,FOXP1,GNAI2,TNFRSF1A,ARL6IP1,MYBBP1A,SYK,GRN,PRDX3,ENO1,PPP1CA,ATF4,TYROBP,…
GO:BP	protein localization to organelle	GO:0033365	4.72461e+09	6325633599193218	973	629	74	18017	CHP1,EZR,AP2M1,MEPCE,NUP214,SIN3A,DHX9,TOMM40,NOLC1,KPNA4,TFDP2,TPP1,SEC61A1,UQCRC2,NUMB,CCT3,DNM2,GLUL,ZDHHC3,TIMM23,SREBF2,RPA1,BUB3,HSP90AB1,TXNIP,YWHAH,HTRA2,RAB35,SUPT7L,NUP153,HSP90AA1,BAG6,TNPO3,RBM22,USP36,ANKRD13A,YWHAQ,CHMP4B,STAT3,SYK,TXN,YBX1,RPL8,RAC2,CD81,DIAPH1,SRP72,FLNA,NUP98,LILRB4,VAPA,RPS18,ARF4,CTDNEP1,RPS5,CCDC88A,SGTA,KPNA1,KAT7,PML,HSPA5,RPL3,TOMM34,FAM53C,TOMM22,MCRS1,HSD…
GO:BP	organic cyclic compound biosynthetic process	GO:1901362	5.29467e+08	6276161023068333	4406	629	223	18017	BAZ2A,CHP1,CTNNB1,EZR,ECD,HLA-DRB1,MEPCE,PSMD11,HIPK3,NOP2,ORC1,EHMT2,SIN3A,SUPT5H,DHX9,USP22,CHCHD2,GATA1,STOML2,VCP,KLF13,CXXC5,HBP1,NOLC1,RAF1,MTPN,TFDP2,CDK4,GPX1,PFDN5,NAMPT,CCNT1,RTF1,ZNFX1,CTDSP1,NFIC,ACTN4,MYBL2,NT5C2,LIG1,DRAP1,SLC39A8,SLC25A39,ATF6,ACSL3,FXN,CCT3,DNM2,C14ORF166,PRMT5,SHC1,THRAP3,SNRPD3,POLD2,ZNF395,ARID2,RARA,PSMB3,POLR2H,PPRC1,SREBF2,PCBD1,BMPR2,DDX41,C1QBP,PSME1,IKZF5…
GO:BP	positive regulation of immune response	GO:0050778	5.32345e+07	627380714340967	766	629	63	18017	EZR,FCGR2A,INPP5D,HLA-DRB1,PSMD11,SIN3A,DHX9,STOML2,RAF1,LIMK1,GRB2,RARA,HLA-DRA,PSMB3,C1QBP,PSME1,PHPT1,HSP90AB1,RGCC,PSMB7,AP1G1,ARPC1B,GPS2,PSMB2,PSMF1,HSP90AA1,BAG6,BRK1,BRAF,ACTB,ARPC2,PHB,ACTR3,FOXP1,SYK,KHDRBS1,FGR,HLA-DPA1,KCNN4,XBP1,PSMC5,PDPK1,ITGB2,PSMD7,ICAM2,CD81,SLC7A5,FBXW11,LILRB4,HMGB2,GATA2,PSMB4,RIPK2,EP300,PSMD13,PTPN6,CYLD,UBE2K,HSPD1,PSME2,WASF2,RIOK3,PSMD2
GO:BP	regulation of cell communication	GO:0010646	5.83404e+08	6234030382737801	3659	629	193	18017	CHP1,CTNNB1,EZR,INPP5D,HLA-DRB1,PSMD11,HIPK3,NOP2,PUM2,EHMT2,DHX9,ADAR,GATA1,VCP,PTBP1,TRAF7,CXXC5,LAMTOR1,RAF1,TFDP2,CDK4,PTPN1,GPX1,PFDN5,PTPRE,GNAQ,ITGA5,P4HB,ACTN4,GRB2,ATP6AP2,SLC20A1,ARHGAP1,ATF6,FXN,DNM2,GLUL,PRMT5,SHC1,RARA,PSMB3,ZDHHC3,PPIF,SREBF2,GSTP1,PSAP,SLC25A5,BMPR2,C1QBP,PSME1,AKR1B1,EEF1D,GPS1,FEM1B,PHPT1,RPA1,PRMT1,ATP2B4,HSP90AB1,YWHAH,RGCC,TTLL12,PSMB7,HTRA2,BCL2L1,CDC37,SIRPA…
GO:BP	regulation of response to biotic stimulus	GO:0002831	7.27846e+08	6.13796e+16	405	629	42	18017	PSMD11,PUM2,SIN3A,DHX9,ADAR,RAF1,PTPN1,PSMB3,C1QBP,PSME1,HSP90AB1,TTLL12,PSMB7,AP1G1,CDC37,JAK1,PSMB2,PSMF1,CYBA,FOXP1,SYK,GRN,FGR,IFNAR2,PSMC5,PDPK1,PSMD7,ICAM2,FBXW11,HMGB2,PSMB4,RIPK2,EP300,PSMD13,PTPN6,UBE2K,HSPD1,PPP2R3C,PSME2,RNF216,RIOK3,PSMD2
GO:BP	protein modification process	GO:0036211	8.26922e+08	6082535550650517	4274	629	217	18017	BAZ2A,CHP1,CTNNB1,EZR,TPP2,CASP3,HLA-DRB1,PSMD11,HIPK3,NUP214,ATG3,EHMT2,SIN3A,PPP4C,ADAR,USP22,GATA1,VCP,PTBP1,TRAF7,LAMTOR1,RAF1,CDK4,DDA1,PTPN1,GPX1,QSOX1,PTPRE,CCNT1,RTF1,CTDSP1,GNAQ,LIMK1,ITGA5,P4HB,GRB2,ATP6AP2,SLC39A8,FXN,OTUB1,RAD23A,DERL1,GLUL,C14ORF166,PRMT5,SHC1,SNRPD3,RPN2,RARA,PSMB3,ZDHHC3,PPIF,GSTP1,PSAP,BMPR2,PSME1,CCND2,GPS1,FEM1B,PHPT1,DPF2,PRMT1,CORO1C,ATP2B4,HSP90AB1,RGCC,TTLL1…
GO:BP	cellular protein modification process	GO:0006464	8.26922e+08	6082535550650517	4274	629	217	18017	BAZ2A,CHP1,CTNNB1,EZR,TPP2,CASP3,HLA-DRB1,PSMD11,HIPK3,NUP214,ATG3,EHMT2,SIN3A,PPP4C,ADAR,USP22,GATA1,VCP,PTBP1,TRAF7,LAMTOR1,RAF1,CDK4,DDA1,PTPN1,GPX1,QSOX1,PTPRE,CCNT1,RTF1,CTDSP1,GNAQ,LIMK1,ITGA5,P4HB,GRB2,ATP6AP2,SLC39A8,FXN,OTUB1,RAD23A,DERL1,GLUL,C14ORF166,PRMT5,SHC1,SNRPD3,RPN2,RARA,PSMB3,ZDHHC3,PPIF,GSTP1,PSAP,BMPR2,PSME1,CCND2,GPS1,FEM1B,PHPT1,DPF2,PRMT1,CORO1C,ATP2B4,HSP90AB1,RGCC,TTLL1…
GO:BP	regulation of signaling	GO:0023051	8.37597e+08	6076965136309659	3699	629	194	18017	CHP1,CTNNB1,EZR,INPP5D,HLA-DRB1,PSMD11,HIPK3,NOP2,PUM2,EHMT2,DHX9,ADAR,GATA1,VCP,PTBP1,TRAF7,CXXC5,LAMTOR1,RAF1,TFDP2,CDK4,PTPN1,GPX1,PFDN5,PTPRE,GNAQ,ITGA5,P4HB,ACTN4,GRB2,ATP6AP2,SLC20A1,ARHGAP1,ATF6,FXN,DNM2,GLUL,PRMT5,SHC1,RARA,PSMB3,ZDHHC3,PPIF,SREBF2,GSTP1,PSAP,SLC25A5,BMPR2,C1QBP,PSME1,AKR1B1,EEF1D,GPS1,FEM1B,PHPT1,RPA1,PRMT1,ATP2B4,HSP90AB1,YWHAH,RGCC,TTLL12,PSMB7,HTRA2,BCL2L1,CDC37,SIRPA…
GO:BP	nucleobase-containing compound biosynthetic process	GO:0034654	8.46841e+08	6072197966210931	4174	629	213	18017	BAZ2A,CHP1,CTNNB1,EZR,ECD,HLA-DRB1,MEPCE,PSMD11,HIPK3,NOP2,ORC1,EHMT2,SIN3A,SUPT5H,DHX9,USP22,CHCHD2,GATA1,STOML2,VCP,KLF13,CXXC5,HBP1,NOLC1,RAF1,MTPN,TFDP2,CDK4,GPX1,PFDN5,NAMPT,CCNT1,RTF1,ZNFX1,CTDSP1,NFIC,ACTN4,MYBL2,NT5C2,LIG1,DRAP1,SLC39A8,ATF6,ACSL3,CCT3,DNM2,C14ORF166,PRMT5,SHC1,THRAP3,SNRPD3,POLD2,ZNF395,ARID2,RARA,PSMB3,POLR2H,PPRC1,SREBF2,PCBD1,BMPR2,DDX41,C1QBP,PSME1,IKZF5,ZNF142,GATAD…
GO:BP	positive regulation of gene expression	GO:0010628	1.02343e+16	5989939833462448	2391	629	139	18017	CTNNB1,EZR,ECD,HLA-DRB1,MEPCE,PUM2,SIN3A,SUPT5H,DHX9,ADAR,USP22,CHCHD2,GATA1,KLF13,NOLC1,RAF1,TFDP2,CDK4,NAMPT,CCNT1,MYH9,NFIC,MYBL2,ATP6AP2,ATF6,EIF3C,DNM2,C14ORF166,SHC1,THRAP3,RARA,POLR2H,PPRC1,SREBF2,PCBD1,BMPR2,DDX41,C1QBP,IKZF5,DPF2,YWHAH,RGCC,H1FX,MED6,WBP2,GPS2,PBX2,MDK,TNIP1,KLF6,SOX12,IER5,CYBA,RBM22,ARNT,BRAF,ACTB,ILK,KHSRP,MAP2K3,DROSHA,PHB,ACTR3,MYD88,HIPK2,PFN1,ARID4B,TNFRSF1A,EIF3D…
GO:BP	response to chemical	GO:0042221	1.33388e+16	5874882691439634	4808	629	237	18017	CTNNB1,EZR,INPP5D,CASP3,HLA-DRB1,PSMD11,EHMT2,SIN3A,DHX9,ADAR,CHCHD2,GATA1,VCP,PDLIM7,PTBP1,LAMTOR1,RAF1,KPNA4,CDK4,PTPN1,GPX1,CAPZA1,TPP1,NAMPT,PTPRE,DCPS,GNAQ,ITGA5,STIP1,P4HB,ACTN4,GRB2,SEC61A1,BSG,MYBL2,UQCRC2,ATF6,ACSL3,FXN,OTUB1,CUTA,DNM2,HADHA,DERL1,GLUL,IFITM2,PRMT5,SHC1,RPN2,RARA,SIGMAR1,HLA-DRA,PSMB3,NDEL1,POLR2H,ATP6V1B2,FIBP,PPIF,SREBF2,GSTP1,PSAP,SLC25A5,RNASE2,BMPR2,DDX41,C1QBP,EIF4…
GO:BP	response to stimulus	GO:0050896	1.38367e+16	5858966211017538	9430	629	404	18017	CHP1,PAFAH1B2,AP1M1,CTNNB1,EZR,FCGR2A,INPP5D,AP2M1,CASP3,HLA-DRB1,PSMD11,HIPK3,NOP2,NUP214,PUM2,EHMT2,SIN3A,ARMC8,DHX9,PPP4C,ADAR,CHCHD2,GATA1,STOML2,VCP,PDLIM7,PTBP1,SMC1A,TRAF7,CXXC5,HBP1,LAMTOR1,NOLC1,RAF1,MTPN,KPNA4,TFDP2,CDK4,PTPN1,GPX1,CAPZA1,PFDN5,QSOX1,TPP1,NAMPT,PTPRE,KCNAB2,DCPS,PI4KB,RTF1,MYH9,GNAQ,LIMK1,ITGA5,STIP1,P4HB,ACTN4,GRB2,SEC61A1,VDAC1,BSG,MYBL2,PLEKHM1,ATP6AP2,LIG1,SLC20A1,U…
GO:BP	antigen processing and presentation	GO:0019882	1.52471e+16	5816811350632565	232	629	30	18017	AP1M1,AP2M1,HLA-DRB1,PSMD11,CAPZA1,AP1B1,DNM2,HLA-DRA,PSMB3,PSAP,PSME1,PSMB7,AP1G1,RAB35,CLTC,PSMB2,CTSD,PSMF1,CYBA,HLA-DPA1,PSMC5,ARF1,PSMD7,HLA-DMA,IFI30,PSMB4,PSMD13,DCTN5,PSME2,PSMD2
GO:BP	regulation of signal transduction	GO:0009966	1.58948e+16	5798745428691283	3236	629	174	18017	CHP1,CTNNB1,EZR,INPP5D,HLA-DRB1,PSMD11,HIPK3,NOP2,PUM2,EHMT2,ADAR,GATA1,VCP,PTBP1,TRAF7,CXXC5,LAMTOR1,RAF1,TFDP2,CDK4,PTPN1,GPX1,PFDN5,PTPRE,GNAQ,ITGA5,P4HB,ACTN4,GRB2,ATP6AP2,SLC20A1,ARHGAP1,ATF6,FXN,DNM2,PRMT5,SHC1,PSMB3,ZDHHC3,PPIF,SREBF2,GSTP1,PSAP,SLC25A5,BMPR2,C1QBP,PSME1,AKR1B1,EEF1D,GPS1,FEM1B,PHPT1,RPA1,PRMT1,ATP2B4,HSP90AB1,YWHAH,TTLL12,PSMB7,HTRA2,BCL2L1,CDC37,SIRPA,LY6E,WBP2,JAK1,ARHG…
GO:BP	formation of cytoplasmic translation initiation complex	GO:0001732	1.59287e+16	5797820906812758	16	629	9	18017	EIF3C,EIF3F,EIF5,EIF3D,EIF3A,EIF3E,EIF3M,EIF3B,EIF3L
GO:BP	regulation of defense response	GO:0031347	1.71779e+16	5765030756859291	751	629	61	18017	HLA-DRB1,PSMD11,PUM2,SIN3A,DHX9,ADAR,RAF1,PTPN1,GPX1,PSMB3,GSTP1,C1QBP,PSME1,HSP90AB1,TTLL12,PSMB7,AP1G1,CDC37,SIRPA,JAK1,GPS2,PSMB2,MDK,TNIP1,PSMF1,PIK3AP1,CYBA,CTSC,DROSHA,MYD88,FOXP1,TNFRSF1A,STAT3,SPATA2,SYK,GRN,FGR,IFNAR2,LDLR,PSMC5,PDPK1,PSMD7,ICAM2,CD81,FBXW11,HMGB2,LPCAT3,PSMB4,RIPK2,EP300,PSMD13,PTPN6,CYLD,TNFRSF1B,UBE2K,HSPD1,IL17RA,PSME2,RNF216,RIOK3,PSMD2
GO:BP	cell cycle process	GO:0022402	1.99564e+16	5.69992e+16	1415	629	94	18017	CTNNB1,EZR,ECD,MEPCE,PSMD11,ORC1,EHMT2,SIN3A,SEPT6,VCP,SMC1A,HBP1,LAMTOR1,TFDP2,CDK4,MYH9,CTDSP1,MYBL2,LIG1,DNM2,PRMT5,PDS5A,POLD2,PSMB3,NDEL1,EIF4EBP1,PSME1,CCND2,RPA1,PRMT1,BUB3,ATP2B4,HSP90AB1,RGCC,PSMB7,RAB35,ANKLE2,BCL2L1,CLTC,PSMB2,STRADB,PSMF1,HSP90AA1,BAG6,DDB1,ILK,ACTR3,CHMP4B,MASTL,MYBBP1A,KHDRBS1,JTB,ANAPC16,NSL1,CCNB2,RAE1,PSMC5,MCM5,ARF1,PSMD7,SSNA1,RHEB,SKP2,FLNA,FBXW11,PIM2,CDK13,C…
GO:BP	leukocyte mediated immunity	GO:0002443	2.17448e+16	5.66264e+16	889	629	68	18017	PAFAH1B2,AP1M1,FCGR2A,INPP5D,HLA-DRB1,PSMD11,ARMC8,VCP,LAMTOR1,QSOX1,KCNAB2,ATP6AP2,TRAPPC1,PGAM1,GSTP1,PSAP,RAB5C,RNASE2,C1QBP,HSP90AB1,PSMB7,AP1G1,SIRPA,CAPN1,CST3,CTSD,HSP90AA1,CYBA,CTSZ,CTSC,CMTM6,BIN2,MYD88,UBR4,ARL8A,SYK,GGH,GRN,FGR,ANPEP,TYROBP,CORO1A,PDPK1,ITGB2,PSMD7,RAC2,CD81,DIAPH1,CDK13,VAPA,GATA2,TIMP2,SURF4,PSMD13,PTPN6,TNFRSF1B,GM2A,GDI2,HSPD1,IST1,NCSTN,PA2G4,CTSA,ILF2,APRT,PSMD2,…
GO:BP	RNA catabolic process	GO:0006401	2224490055138262	5652769531479538	420	629	42	18017	PSMD11,NUP214,PUM2,DHX9,DCPS,THRAP3,PSMB3,RNASE2,PSME1,PSMB7,PSMB2,PSMF1,KHSRP,DROSHA,MYD88,YBX1,RPL8,NAF1,PSMC5,EIF3E,EXOSC1,PSMD7,ZC3HAV1,IGF2BP2,RBM8A,RPS18,POLR2G,RPS5,PSMB4,PSMD13,RPL3,TNFRSF1B,SAMD4B,PPP2CA,GTPBP1,PSME2,RPL36A,RPL24,HSPB1,CNOT2,PSMD2,NPM1
GO:BP	transcription by RNA polymerase II	GO:0006366	2478074280851249	5605885679687031	2330	629	135	18017	CTNNB1,EZR,ECD,MEPCE,PSMD11,NOP2,EHMT2,SIN3A,SUPT5H,DHX9,CHCHD2,GATA1,KLF13,CXXC5,HBP1,RAF1,TFDP2,CDK4,NAMPT,CCNT1,RTF1,ZNFX1,CTDSP1,NFIC,MYBL2,DRAP1,ATF6,C14ORF166,THRAP3,SNRPD3,ZNF395,RARA,PSMB3,POLR2H,PPRC1,SREBF2,BMPR2,DDX41,C1QBP,PSME1,IKZF5,ZNF142,GATAD2B,DPF2,ATP2B4,ADNP2,TXNIP,RGCC,PSMB7,MED6,IRF9,WBP2,GPS2,PSMB2,PBX2,TNIP1,PSMF1,KLF6,SOX12,IER5,EPC2,ARNT,KHSRP,PHF12,PHB,ACTR3,HIPK2,PFN1,…
GO:BP	nucleobase-containing compound catabolic process	GO:0034655	2.82457e+16	5549047756524304	560	629	50	18017	CASP3,PSMD11,NUP214,PUM2,DHX9,VCP,GPX1,DCPS,NT5C2,THRAP3,PSMB3,RNASE2,PSME1,PSMB7,PSMB2,PSMF1,KHSRP,DROSHA,MYD88,YBX1,RPL8,NAF1,PSMC5,EIF3E,EXOSC1,PSMD7,ZC3HAV1,MBD4,IGF2BP2,RBM8A,HMGB2,RPS18,POLR2G,RPS5,PSMB4,KPNA1,PSMD13,RPL3,TNFRSF1B,SAMD4B,PPP2CA,GTPBP1,PSME2,RPL36A,PDE7A,RPL24,HSPB1,CNOT2,PSMD2,NPM1
GO:BP	regulation of cellular process	GO:0050794	3171316891026163	549876035931387	11418	629	468	18017	BAZ2A,CHP1,PAFAH1B2,CTNNB1,EZR,FCGR2A,ECD,INPP5D,AP2M1,CASP3,HLA-DRB1,MEPCE,PSMD11,HIPK3,NOP2,ORC1,NUP214,ATG3,PUM2,EHMT2,SIN3A,SUPT5H,DHX9,PPP4C,ADAR,USP22,CHCHD2,GATA1,STOML2,VCP,KLF13,PDLIM7,PTBP1,TRAF7,CXXC5,HBP1,LAMTOR1,NOLC1,RAF1,MTPN,KPNA4,TFDP2,CDK4,DDA1,PTPN1,GPX1,CAPZA1,PFDN5,QSOX1,TPP1,NAMPT,PTPRE,KCNAB2,DCPS,CCNT1,PI4KB,RTF1,ZNFX1,MYH9,CTDSP1,GNAQ,LIMK1,ITGA5,NFIC,P4HB,ACTN4,GRB2,VDAC…
GO:BP	regulation of innate immune response	GO:0045088	3.48064e+16	5458340544158896	299	629	34	18017	PSMD11,SIN3A,DHX9,ADAR,RAF1,PTPN1,PSMB3,PSME1,HSP90AB1,TTLL12,PSMB7,AP1G1,CDC37,JAK1,PSMB2,PSMF1,SYK,GRN,FGR,IFNAR2,PSMC5,PDPK1,PSMD7,ICAM2,FBXW11,HMGB2,PSMB4,EP300,PSMD13,PTPN6,UBE2K,PSME2,RIOK3,PSMD2
GO:BP	regulation of cell cycle	GO:0051726	3803712850344621	5419792276229339	1223	629	84	18017	CTNNB1,ECD,CASP3,MEPCE,PSMD11,ORC1,NUP214,EHMT2,SIN3A,USP22,HBP1,LAMTOR1,TFDP2,CDK4,CCNT1,CTDSP1,MYBL2,RAD23A,PRMT5,RARA,PSMB3,EIF4EBP1,PSME1,CCND2,FEM1B,PRMT1,BUB3,ATP2B4,HSP90AB1,RGCC,TTLL12,PSMB7,HTRA2,BCL2L1,CDC37,CLTC,PSMB2,STRADB,PSMF1,HSP90AA1,DDB1,ACTB,ILK,HIPK2,CHMP4B,STAT3,MASTL,MYBBP1A,JUNB,ANAPC16,CCNB2,RAE1,PSMC5,JUND,PRPF19,PSMD7,SSNA1,RHEB,SKP2,PIM2,CDK13,TIMP2,PSMB4,EP300,PLAGL1,P…
GO:BP	proteasome-mediated ubiquitin-dependent protein catabolic process	GO:0043161	3938221132232448	5404699901755028	428	629	42	18017	CTNNB1,PSMD11,ARMC8,VCP,DDA1,RAD23A,DERL1,PSMB3,PSME1,BUB3,HSP90AB1,PSMB7,PCNP,PSMB2,ZNRF1,PSMF1,BAG6,DDB1,ZFAND2A,KCTD10,ANAPC16,EDEM1,UBE2G2,PSMC5,UBXN1,PSMD7,SKP2,FBXW11,CSNK1A1,PSMB4,SGTA,PML,PSMD13,HSPA5,MTA1,RNF4,UBE2K,ARIH1,PSME2,RNF216,CDC20,PSMD2
GO:BP	cytoplasmic translational initiation	GO:0002183	4084645363118001	5.38885e+16	36	629	12	18017	EIF3C,EIF4EBP1,RBM4,EIF3F,EIF4H,EIF5,EIF3D,EIF3A,EIF3E,EIF3M,EIF3B,EIF3L
GO:BP	macromolecule modification	GO:0043412	5357225385461366	5271060081907317	4489	629	222	18017	BAZ2A,CHP1,CTNNB1,EZR,TPP2,CASP3,HLA-DRB1,MEPCE,PSMD11,HIPK3,NOP2,NUP214,ATG3,EHMT2,SIN3A,PPP4C,ADAR,USP22,GATA1,VCP,PTBP1,TRAF7,LAMTOR1,RAF1,CDK4,DDA1,PTPN1,GPX1,QSOX1,PTPRE,CCNT1,RTF1,CTDSP1,GNAQ,LIMK1,ITGA5,P4HB,GRB2,ATP6AP2,SLC39A8,FXN,OTUB1,RAD23A,DERL1,GLUL,C14ORF166,PRMT5,SHC1,SNRPD3,RPN2,RARA,PSMB3,ZDHHC3,PPIF,GSTP1,PSAP,BMPR2,PSME1,CCND2,GPS1,FEM1B,PHPT1,DPF2,PRMT1,CORO1C,ATP2B4,HSP90AB1…
GO:BP	positive regulation of nucleic acid-templated transcription	GO:1903508	5444506594519255	5264041471828682	1681	629	105	18017	CTNNB1,ECD,HLA-DRB1,MEPCE,SIN3A,SUPT5H,DHX9,USP22,CHCHD2,GATA1,KLF13,NOLC1,RAF1,TFDP2,NAMPT,CCNT1,NFIC,ACTN4,MYBL2,ATF6,DNM2,C14ORF166,SHC1,THRAP3,RARA,PPRC1,SREBF2,PCBD1,BMPR2,DDX41,IKZF5,DPF2,YWHAH,RGCC,H1FX,MED6,WBP2,SUPT7L,GPS2,PBX2,MDK,TNIP1,KLF6,SOX12,IER5,ARNT,ILK,KHSRP,MAP2K3,PHB,ACTR3,HIPK2,PFN1,ARID4B,TNFRSF1A,STAT3,YBX1,SMARCC2,JUNB,ATF4,XBP1,PSMC5,JUND,PRDM10,CAMTA2,NOL11,SLC40A1,SKI,…
GO:BP	positive regulation of RNA biosynthetic process	GO:1902680	5624402061093904	524992364128247	1682	629	105	18017	CTNNB1,ECD,HLA-DRB1,MEPCE,SIN3A,SUPT5H,DHX9,USP22,CHCHD2,GATA1,KLF13,NOLC1,RAF1,TFDP2,NAMPT,CCNT1,NFIC,ACTN4,MYBL2,ATF6,DNM2,C14ORF166,SHC1,THRAP3,RARA,PPRC1,SREBF2,PCBD1,BMPR2,DDX41,IKZF5,DPF2,YWHAH,RGCC,H1FX,MED6,WBP2,SUPT7L,GPS2,PBX2,MDK,TNIP1,KLF6,SOX12,IER5,ARNT,ILK,KHSRP,MAP2K3,PHB,ACTR3,HIPK2,PFN1,ARID4B,TNFRSF1A,STAT3,YBX1,SMARCC2,JUNB,ATF4,XBP1,PSMC5,JUND,PRDM10,CAMTA2,NOL11,SLC40A1,SKI,…
GO:BP	aromatic compound catabolic process	GO:0019439	5768593735775601	5238930045982698	626	629	53	18017	CASP3,PSMD11,NUP214,PUM2,DHX9,VCP,GPX1,DCPS,NT5C2,THRAP3,PSMB3,FAH,PCBD1,RNASE2,PSME1,PSMB7,PSMB2,PSMF1,EPHX1,KHSRP,DROSHA,MYD88,YBX1,RPL8,NAF1,PSMC5,EIF3E,EXOSC1,PSMD7,ZC3HAV1,MBD4,IGF2BP2,RBM8A,HMGB2,RPS18,POLR2G,RPS5,PSMB4,KPNA1,PSMD13,RPL3,TNFRSF1B,SAMD4B,PPP2CA,GTPBP1,PSME2,RPL36A,PDE7A,RPL24,HSPB1,CNOT2,PSMD2,NPM1
GO:BP	phosphorylation	GO:0016310	5.90322e+16	5228911012601576	2501	629	141	18017	CHP1,CTNNB1,EZR,CASP3,HLA-DRB1,PSMD11,HIPK3,NUP214,ADAR,GATA1,STOML2,VCP,TRAF7,LAMTOR1,RAF1,CDK4,PTPN1,CCNT1,PI4KB,CTDSP1,GNAQ,LIMK1,ITGA5,GRB2,ATP6AP2,UQCRC2,FXN,C14ORF166,PRMT5,SHC1,RARA,PSMB3,PGAM1,PPIF,GSTP1,PSAP,BMPR2,PSME1,CCND2,GPS1,PRMT1,CORO1C,ATP2B4,HSP90AB1,RGCC,PSMB7,ANKLE2,CDC37,SIRPA,SHMT2,BCKDK,NDUFB9,JAK1,GPS2,PSMB2,STRADB,NUP153,TNIP1,SYAP1,PSMF1,HSP90AA1,CLK3,ARNT,BRAF,ACTB,DAZA…
GO:BP	protein modification by small protein conjugation or removal	GO:0070647	6297254720252778	5200848739386067	1174	629	81	18017	CHP1,CTNNB1,TPP2,PSMD11,NUP214,ATG3,USP22,VCP,TRAF7,DDA1,RTF1,LIMK1,OTUB1,RAD23A,DERL1,PSMB3,PSME1,GPS1,FEM1B,HSP90AB1,PSMB7,MED6,SHMT2,PCNP,GPS2,PSMB2,NUP153,TNIP1,ZNRF1,PSMF1,HSP90AA1,EIF3F,USP36,ARNT,ARRDC3,DDB1,ACTB,UBR4,KCTD10,MASTL,SPATA2,RNF130,TRRAP,FKBP1A,ANAPC16,JOSD1,RAE1,UBE2G2,PSMC5,UBE2M,MBD6,UBXN1,PRPF19,PSMD7,SKP2,DCAF12,NUP98,UFC1,FBXW11,ANAPC13,PSMB4,RIPK2,EP300,COPS3,PML,PSMD13…
GO:BP	RNA biosynthetic process	GO:0032774	6730576993213365	5171947703349963	3716	629	191	18017	BAZ2A,CHP1,CTNNB1,EZR,ECD,HLA-DRB1,MEPCE,PSMD11,HIPK3,NOP2,ORC1,EHMT2,SIN3A,SUPT5H,DHX9,USP22,CHCHD2,GATA1,KLF13,CXXC5,HBP1,NOLC1,RAF1,MTPN,TFDP2,CDK4,PFDN5,NAMPT,CCNT1,RTF1,ZNFX1,CTDSP1,NFIC,ACTN4,MYBL2,DRAP1,SLC39A8,ATF6,DNM2,C14ORF166,PRMT5,SHC1,THRAP3,SNRPD3,ZNF395,ARID2,RARA,PSMB3,POLR2H,PPRC1,SREBF2,PCBD1,BMPR2,DDX41,C1QBP,PSME1,IKZF5,ZNF142,GATAD2B,DPF2,ATP2B4,ADNP2,FLOT2,TXNIP,YWHAH,RGCC,…
GO:BP	regulation of transcription by RNA polymerase II	GO:0006357	6819155461272235	5166269408513708	2182	629	127	18017	CTNNB1,EZR,ECD,MEPCE,PSMD11,NOP2,EHMT2,SIN3A,SUPT5H,DHX9,CHCHD2,GATA1,KLF13,CXXC5,HBP1,RAF1,TFDP2,NAMPT,CCNT1,RTF1,ZNFX1,CTDSP1,NFIC,MYBL2,DRAP1,ATF6,C14ORF166,THRAP3,ZNF395,RARA,PSMB3,PPRC1,SREBF2,BMPR2,DDX41,C1QBP,PSME1,IKZF5,ZNF142,GATAD2B,DPF2,ATP2B4,ADNP2,TXNIP,RGCC,PSMB7,MED6,IRF9,WBP2,GPS2,PSMB2,PBX2,TNIP1,PSMF1,KLF6,SOX12,IER5,EPC2,ARNT,KHSRP,PHF12,PHB,ACTR3,HIPK2,PFN1,ARID4B,FOXP1,TNFRSF…
GO:BP	protein modification by small protein removal	GO:0070646	7532982194964835	5123033059069162	308	629	34	18017	PSMD11,USP22,VCP,OTUB1,RAD23A,PSMB3,PSME1,GPS1,PSMB7,SHMT2,PSMB2,TNIP1,PSMF1,EIF3F,USP36,ACTB,SPATA2,TRRAP,JOSD1,PSMC5,MBD6,UBXN1,PSMD7,SKP2,PSMB4,EP300,COPS3,PSMD13,CYLD,MCRS1,PSME2,CDC20,USP21,PSMD2
GO:BP	regulation of immune system process	GO:0002682	7739798038465597	5111270371607068	1648	629	103	18017	CTNNB1,EZR,FCGR2A,INPP5D,CASP3,HLA-DRB1,PSMD11,PUM2,SIN3A,DHX9,ADAR,GATA1,STOML2,KLF13,RAF1,PTPN1,GPX1,LIMK1,GRB2,SHC1,RARA,HLA-DRA,PSMB3,C1QBP,PSME1,PHPT1,DPF2,PRMT1,FLOT2,HSP90AB1,RGCC,TTLL12,PSMB7,AP1G1,CDC37,SIRPA,JAK1,ARPC1B,GPS2,PSMB2,MDK,PSMF1,HSP90AA1,SOX12,BAG6,BRK1,ARNT,BRAF,ACTB,CTSC,ARPC2,DROSHA,PHB,ACTR3,MYD88,FOXP1,STAT3,SYK,KHDRBS1,FKBP1A,GRN,FGR,IFNAR2,HLA-DPA1,KCNN4,LDLR,TYROBP,C…
GO:BP	nucleic acid-templated transcription	GO:0097659	8376266471253179	507694951505008	3701	629	190	18017	BAZ2A,CHP1,CTNNB1,EZR,ECD,HLA-DRB1,MEPCE,PSMD11,HIPK3,NOP2,ORC1,EHMT2,SIN3A,SUPT5H,DHX9,USP22,CHCHD2,GATA1,KLF13,CXXC5,HBP1,NOLC1,RAF1,MTPN,TFDP2,CDK4,PFDN5,NAMPT,CCNT1,RTF1,ZNFX1,CTDSP1,NFIC,ACTN4,MYBL2,DRAP1,SLC39A8,ATF6,DNM2,C14ORF166,PRMT5,SHC1,THRAP3,SNRPD3,ZNF395,ARID2,RARA,PSMB3,POLR2H,PPRC1,SREBF2,PCBD1,BMPR2,DDX41,C1QBP,PSME1,IKZF5,ZNF142,GATAD2B,DPF2,ATP2B4,ADNP2,FLOT2,TXNIP,YWHAH,RGCC,…
GO:BP	posttranscriptional regulation of gene expression	GO:0010608	8677142841442828	5061623253217803	880	629	66	18017	PSMD11,NUP214,PUM2,DHX9,ADAR,PTBP1,NOLC1,MTPN,CDK4,EIF3C,THRAP3,RARA,PSMB3,POLR2H,C1QBP,EIF4EBP1,PSME1,PSMB7,CDC37,SHMT2,RBM4,PSMB2,NUP153,PSMF1,UNK,EIF4H,EIF5,KHSRP,EIF1B,DROSHA,MYD88,EIF3D,STAT3,CAPRIN1,YBX1,KHDRBS1,PTCD3,NAF1,PPP1CA,ATF4,RAE1,PSMC5,EIF3E,EIF5A,EXOSC1,PSMD7,NUP98,FOXO3,IGF2BP2,RBM8A,EIF3B,POLR2G,PSMB4,PSMD13,TNFRSF1B,SAMD4B,PA2G4,DDX39B,NGDN,PSME2,PTK2B,HSPB1,H3F3A,CNOT2,PSMD2,…
GO:BP	proteolysis involved in cellular protein catabolic process	GO:0051603	9039365426742186	5043862056398245	746	629	59	18017	CTNNB1,PSMD11,ARMC8,USP22,VCP,DDA1,GPX1,RAD23A,DERL1,PSMB3,PSME1,BUB3,HSP90AB1,PSMB7,PCNP,PSMB2,ZNRF1,PSMF1,BAG6,CTSZ,USP36,DDB1,CTSC,HIPK2,UBR4,CHMP4B,ZFAND2A,KCTD10,RNF130,ANAPC16,EDEM1,XBP1,UBE2G2,PSMC5,UBXN1,PRPF19,PSMD7,SKP2,FBXW11,CSNK1A1,PSMB4,SGTA,COPS3,PML,PSMD13,CYLD,HSPA5,MTA1,RNF4,UBE2K,ARIH1,SQSTM1,PSME2,RNF216,CTSW,PTK2B,CDC20,USP21,PSMD2
GO:BP	positive regulation of transcription, DNA-templated	GO:0045893	9905149158747900	5.00414e+16	1590	629	100	18017	CTNNB1,ECD,HLA-DRB1,MEPCE,SIN3A,SUPT5H,DHX9,USP22,CHCHD2,GATA1,KLF13,NOLC1,RAF1,TFDP2,NAMPT,CCNT1,NFIC,MYBL2,ATF6,DNM2,C14ORF166,SHC1,THRAP3,RARA,PPRC1,SREBF2,PCBD1,BMPR2,DDX41,IKZF5,DPF2,YWHAH,RGCC,H1FX,MED6,WBP2,GPS2,PBX2,MDK,TNIP1,KLF6,SOX12,IER5,ARNT,ILK,KHSRP,MAP2K3,PHB,ACTR3,HIPK2,PFN1,ARID4B,TNFRSF1A,STAT3,YBX1,SMARCC2,JUNB,ATF4,XBP1,PSMC5,JUND,PRDM10,CAMTA2,NOL11,SLC40A1,SKI,CD81,FOXO3,FB…
GO:BP	nucleocytoplasmic transport	GO:0006913	1.00691e+16	4997009845712659	359	629	37	18017	CHP1,NUP214,DHX9,NOLC1,KPNA4,SNRPD3,HSP90AB1,TXNIP,RBM4,SRSF9,STRADB,NUP153,TNPO3,RBM22,SRSF6,DDX39A,SRSF1,STAT3,SYK,TXN,KHDRBS1,RAE1,EIF5A,FLNA,NUP98,RBM8A,SLBP,KPNA1,PML,CPSF6,FAM53C,PPP1R10,XPOT,DDX39B,EGR2,U2AF2,NPM1
GO:BP	response to oxygen levels	GO:0070482	1.07136e+16	4970065604998932	409	629	40	18017	CASP3,PSMD11,CHCHD2,RAF1,CDK4,NAMPT,P4HB,ACTN4,PSMB3,EIF4EBP1,PSME1,RGCC,PSMB7,ALAS1,PSMB2,GNB1,PSMF1,CYBA,ARNT,HIPK2,ENO1,ATF4,NDRG1,PSMC5,TXN2,PGK1,PSMD7,FOXO3,UCP2,PSMB4,EP300,PML,PSMD13,FOXO1,HSPD1,PSME2,REST,PTK2B,ADM,PSMD2
GO:BP	regulation of cellular localization	GO:0060341	1.12235e+16	494987179746868	1005	629	72	18017	CHP1,CTNNB1,EZR,AP2M1,HLA-DRB1,MEPCE,NUP214,SIN3A,DHX9,NOLC1,TFDP2,PTPN1,KCNAB2,ARHGAP1,ACSL3,NUMB,CCT3,GLUL,NDEL1,SREBF2,PHPT1,ATP2B4,HSP90AB1,YWHAH,HTRA2,AP1G1,BCL2L1,RBM4,CLTC,NUP153,HSP90AA1,CYBA,RBM22,USP36,BRAF,ACTB,ANKRD13A,YWHAQ,SYK,TXN,KHDRBS1,FKBP1A,FGR,EDEM1,C2CD2L,TYROBP,UBE2G2,CORO1A,ARF1,PDPK1,ITGB2,RAC2,CD81,DIAPH1,FLNA,LILRB4,GATA2,SH3GL1,UCP2,CCDC88A,SLC30A1,KAT7,PML,CPSF6,PTPN6,…
GO:BP	regulation of mRNA catabolic process	GO:0061013	1.12371e+16	4949345543446584	209	629	27	18017	PSMD11,NUP214,PUM2,DHX9,THRAP3,PSMB3,PSME1,PSMB7,PSMB2,PSMF1,KHSRP,MYD88,YBX1,PSMC5,EXOSC1,PSMD7,ZC3HAV1,IGF2BP2,POLR2G,PSMB4,PSMD13,SAMD4B,GTPBP1,PSME2,HSPB1,PSMD2,NPM1
GO:BP	cellular amide metabolic process	GO:0043603	1.13422e+16	4945303515885333	1210	629	82	18017	CASP3,MRPL38,PUM2,DHX9,PTBP1,NOLC1,MTPN,CDK4,GPX1,TPP1,ATP6AP2,EIF3C,ACSL3,RARA,PGAM1,GSTP1,PSAP,C1QBP,EIF4EBP1,EEF1D,CERS2,HTRA2,SHMT2,RBM4,TNIP1,FARSA,EIF3F,UNK,CTSZ,EIF4H,EIF5,KHSRP,EIF1B,MPC1,TNFRSF1A,EIF3D,STAT3,CAPRIN1,YBX1,GGH,KHDRBS1,PTCD3,RPL8,EIF3A,PPP1CA,ANPEP,NAGA,ATF4,EIF3E,EIF5A,EIF3M,FOXO3,IGF2BP2,HSD17B12,RBM8A,EIF3B,RPS18,POLR2G,RPS5,B4GALT5,TECR,RPL3,MRPL53,GM2A,EIF3L,HSD17B4,NC…
GO:BP	RNA splicing, via transesterification reactions	GO:0000375	1.17096e+16	4931458850154355	361	629	37	18017	DHX9,PTBP1,DCPS,PRMT5,THRAP3,SNRPD3,POLR2H,DDX41,C1QBP,PRPF38B,SNRPA,SMU1,RBM4,AAR2,SRSF9,RBM22,SRSF6,KHSRP,DDX39A,SRSF1,YBX1,KHDRBS1,STRAP,RALY,PRPF19,SRRM2,NUP98,RBM8A,CDK13,SF3A1,POLR2G,SNRPA1,SNRPC,DDX39B,REST,TRA2A,U2AF2
GO:BP	regulation of RNA biosynthetic process	GO:2001141	1217353440209422	4.91458e+16	3544	629	183	18017	BAZ2A,CHP1,CTNNB1,EZR,ECD,HLA-DRB1,MEPCE,PSMD11,NOP2,ORC1,EHMT2,SIN3A,SUPT5H,DHX9,USP22,CHCHD2,GATA1,KLF13,CXXC5,HBP1,NOLC1,RAF1,MTPN,TFDP2,PFDN5,NAMPT,CCNT1,RTF1,ZNFX1,CTDSP1,NFIC,ACTN4,MYBL2,DRAP1,SLC39A8,ATF6,DNM2,C14ORF166,PRMT5,SHC1,THRAP3,ZNF395,ARID2,RARA,PSMB3,PPRC1,SREBF2,PCBD1,BMPR2,DDX41,C1QBP,PSME1,IKZF5,ZNF142,GATAD2B,DPF2,ATP2B4,ADNP2,FLOT2,TXNIP,YWHAH,RGCC,PSMB7,H1FX,MED6,IRF9,WBP2…
GO:BP	regulation of RNA stability	GO:0043487	1.23433e+16	4.90857e+16	196	629	26	18017	PSMD11,NUP214,PUM2,DHX9,THRAP3,PSMB3,PSME1,PSMB7,PSMB2,PSMF1,KHSRP,MYD88,YBX1,NAF1,PSMC5,EXOSC1,PSMD7,IGF2BP2,PSMB4,PSMD13,TNFRSF1B,SAMD4B,PSME2,HSPB1,PSMD2,NPM1
GO:BP	cell surface receptor signaling pathway	GO:0007166	1.25686e+16	4900711656364835	3250	629	171	18017	CTNNB1,EZR,FCGR2A,INPP5D,AP2M1,CASP3,HLA-DRB1,PSMD11,ADAR,GATA1,STOML2,VCP,PTBP1,TRAF7,HBP1,RAF1,CDK4,PTPN1,GPX1,CAPZA1,PFDN5,PTPRE,RTF1,MYH9,GNAQ,LIMK1,ITGA5,P4HB,ACTN4,GRB2,BSG,ATP6AP2,DNM2,IFITM2,SHC1,HLA-DRA,PSMB3,ZDHHC3,NDEL1,POLR2H,ATP6V1B2,FIBP,SREBF2,GSTP1,BMPR2,EIF4EBP1,PSME1,AKR1B1,FEM1B,PHPT1,PRMT1,HSP90AB1,TXNIP,TTLL12,PSMB7,HTRA2,BCL2L1,CDC37,TALDO1,LY6E,IRF9,JAK1,ARPC1B,TIPARP,GABAR…
GO:BP	nuclear transport	GO:0051169	1262148764183221	4898889453605179	362	629	37	18017	CHP1,NUP214,DHX9,NOLC1,KPNA4,SNRPD3,HSP90AB1,TXNIP,RBM4,SRSF9,STRADB,NUP153,TNPO3,RBM22,SRSF6,DDX39A,SRSF1,STAT3,SYK,TXN,KHDRBS1,RAE1,EIF5A,FLNA,NUP98,RBM8A,SLBP,KPNA1,PML,CPSF6,FAM53C,PPP1R10,XPOT,DDX39B,EGR2,U2AF2,NPM1
GO:BP	organic cyclic compound catabolic process	GO:1901361	1.27534e+16	489437528225144	659	629	54	18017	CASP3,PSMD11,NUP214,PUM2,DHX9,VCP,GPX1,DCPS,NT5C2,THRAP3,PSMB3,FAH,PCBD1,RNASE2,PSME1,YWHAH,PSMB7,PSMB2,PSMF1,KHSRP,DROSHA,MYD88,YBX1,RPL8,NAF1,PSMC5,EIF3E,EXOSC1,PSMD7,ZC3HAV1,MBD4,IGF2BP2,RBM8A,HMGB2,RPS18,POLR2G,RPS5,PSMB4,HSD17B11,KPNA1,PSMD13,RPL3,TNFRSF1B,SAMD4B,PPP2CA,GTPBP1,PSME2,RPL36A,PDE7A,RPL24,HSPB1,CNOT2,PSMD2,NPM1
GO:BP	positive regulation of defense response	GO:0031349	1429919916446786	4844688284786104	380	629	38	18017	PSMD11,PUM2,SIN3A,DHX9,RAF1,PSMB3,PSME1,PSMB7,AP1G1,PSMB2,MDK,TNIP1,PSMF1,CYBA,CTSC,MYD88,TNFRSF1A,STAT3,SYK,GRN,LDLR,PSMC5,PDPK1,PSMD7,ICAM2,CD81,FBXW11,HMGB2,PSMB4,RIPK2,EP300,PSMD13,UBE2K,HSPD1,IL17RA,PSME2,RIOK3,PSMD2
GO:BP	organic substance transport	GO:0071702	1.51088e+16	4820771282373056	2870	629	155	18017	CHP1,AP1M1,EZR,AP2M1,HLA-DRB1,NUP214,ATG3,DHX9,COPE,VCP,LAMTOR1,TOMM40,NOLC1,RAF1,KPNA4,TFDP2,PTPN1,AP1B1,HDLBP,MYH9,ACTN4,SEC61A1,PLEKHM1,UQCRC2,SLC39A8,ARHGAP1,SLC25A39,ACSL3,NUMB,DNM2,DERL1,GLUL,C14ORF166,SIGMAR1,GAPVD1,ZDHHC3,NDEL1,ATP6V1B2,TIMM23,MTX1,SREBF2,PSAP,RAB5C,SLC25A5,PHPT1,HSP90AB1,TXNIP,YWHAH,RGCC,HTRA2,AP1G1,RAB35,CDC37,TBC1D9B,GABARAP,CLTC,GPS2,SRSF9,STRADB,NUP153,HSP90AA1,TNPO3…
GO:BP	mRNA catabolic process	GO:0006402	1.53705e+16	4813312050127675	381	629	38	18017	PSMD11,NUP214,PUM2,DHX9,DCPS,THRAP3,PSMB3,PSME1,PSMB7,PSMB2,PSMF1,KHSRP,MYD88,YBX1,RPL8,PSMC5,EIF3E,EXOSC1,PSMD7,ZC3HAV1,IGF2BP2,RBM8A,RPS18,POLR2G,RPS5,PSMB4,PSMD13,RPL3,SAMD4B,PPP2CA,GTPBP1,PSME2,RPL36A,RPL24,HSPB1,CNOT2,PSMD2,NPM1
GO:BP	response to decreased oxygen levels	GO:0036293	1.65173e+16	4782061918750663	382	629	38	18017	CASP3,PSMD11,CHCHD2,RAF1,NAMPT,P4HB,ACTN4,PSMB3,EIF4EBP1,PSME1,RGCC,PSMB7,ALAS1,PSMB2,GNB1,PSMF1,CYBA,ARNT,HIPK2,ENO1,ATF4,NDRG1,PSMC5,TXN2,PGK1,PSMD7,FOXO3,UCP2,PSMB4,EP300,PML,PSMD13,HSPD1,PSME2,REST,PTK2B,ADM,PSMD2
GO:BP	regulation of hemopoiesis	GO:1903706	1744651066738318	4758291419675118	502	629	45	18017	CTNNB1,INPP5D,HLA-DRB1,PSMD11,SIN3A,GATA1,KLF13,RARA,PSMB3,PSME1,DPF2,PRMT1,PSMB7,PSMB2,MDK,PSMF1,SOX12,ARNT,BRAF,DROSHA,FOXP1,STAT3,SYK,TYROBP,CSF3R,XBP1,PSMC5,RHOH,PSMD7,FOXO3,LILRB4,HMGB2,GATA2,PSMB4,RIPK2,EP300,KAT7,PSMD13,PTPN6,CYLD,PPP2R3C,PSME2,PTK2B,H3F3A,PSMD2
GO:BP	positive regulation of protein metabolic process	GO:0051247	1.86553e+16	4729197712930244	1742	629	106	18017	CHP1,CTNNB1,EZR,CASP3,HLA-DRB1,DHX9,GATA1,VCP,PTBP1,TRAF7,LAMTOR1,RAF1,MTPN,CDK4,DDA1,PTPN1,CCNT1,RTF1,MYH9,ITGA5,EIF3C,RAD23A,DERL1,SHC1,PSAP,BMPR2,C1QBP,PSME1,CCND2,PRMT1,ATP2B4,HSP90AB1,RGCC,HTRA2,ANKLE2,WBP2,TIPARP,STRADB,CTSD,TNIP1,SYAP1,HSP90AA1,BAG6,ARNT,ARRDC3,BRAF,DDB1,DAZAP2,ILK,CTSC,MAP2K3,PHB,MYD88,HIPK2,GNAI2,TNFRSF1A,ZFAND2A,EIF3D,STAT3,MASTL,SYK,TXN,KHDRBS1,FKBP1A,GRN,JTB,EDEM1,ENO…
GO:BP	regulation of nucleic acid-templated transcription	GO:1903506	1.8839e+16	4724941081431912	3539	629	182	18017	BAZ2A,CHP1,CTNNB1,EZR,ECD,HLA-DRB1,MEPCE,PSMD11,NOP2,ORC1,EHMT2,SIN3A,SUPT5H,DHX9,USP22,CHCHD2,GATA1,KLF13,CXXC5,HBP1,NOLC1,RAF1,MTPN,TFDP2,PFDN5,NAMPT,CCNT1,RTF1,ZNFX1,CTDSP1,NFIC,ACTN4,MYBL2,DRAP1,SLC39A8,ATF6,DNM2,C14ORF166,PRMT5,SHC1,THRAP3,ZNF395,ARID2,RARA,PSMB3,PPRC1,SREBF2,PCBD1,BMPR2,DDX41,C1QBP,PSME1,IKZF5,ZNF142,GATAD2B,DPF2,ATP2B4,ADNP2,FLOT2,TXNIP,YWHAH,RGCC,PSMB7,H1FX,MED6,IRF9,WBP2…
GO:BP	ubiquitin-dependent protein catabolic process	GO:0006511	1.89702e+16	4721928180353141	648	629	53	18017	CTNNB1,PSMD11,ARMC8,USP22,VCP,DDA1,RAD23A,DERL1,PSMB3,PSME1,BUB3,HSP90AB1,PSMB7,PCNP,PSMB2,ZNRF1,PSMF1,BAG6,USP36,DDB1,HIPK2,UBR4,ZFAND2A,KCTD10,RNF130,ANAPC16,EDEM1,XBP1,UBE2G2,PSMC5,UBXN1,PSMD7,SKP2,FBXW11,CSNK1A1,PSMB4,SGTA,COPS3,PML,PSMD13,CYLD,HSPA5,MTA1,RNF4,UBE2K,ARIH1,SQSTM1,PSME2,RNF216,PTK2B,CDC20,USP21,PSMD2
GO:BP	regulation of protein catabolic process	GO:0042176	210002924119327	4677774658027763	402	629	39	18017	EZR,VCP,DDA1,GPX1,RAD23A,PSME1,HSP90AB1,TIPARP,CST3,PSMF1,HSP90AA1,BAG6,DDB1,CTSC,PHB,HIPK2,ZFAND2A,ODC1,EDEM1,LDLR,UBE2G2,UBXN1,CD81,FLNA,TIMP2,CSNK1A1,SGTA,PML,TNFRSF1B,UBE2K,FOXO1,ARIH1,CTSA,PSME2,PTK2B,ATRAID,CDC20,PSMD2,STX5
GO:BP	proteasomal protein catabolic process	GO:0010498	2163963196949008	4664750129655061	488	629	44	18017	CTNNB1,PSMD11,ARMC8,VCP,DDA1,GPX1,RAD23A,DERL1,PSMB3,PSME1,BUB3,HSP90AB1,PSMB7,PCNP,PSMB2,ZNRF1,PSMF1,BAG6,DDB1,ZFAND2A,KCTD10,ANAPC16,EDEM1,UBE2G2,PSMC5,UBXN1,PRPF19,PSMD7,SKP2,FBXW11,CSNK1A1,PSMB4,SGTA,PML,PSMD13,HSPA5,MTA1,RNF4,UBE2K,ARIH1,PSME2,RNF216,CDC20,PSMD2
GO:BP	protein deubiquitination	GO:0016579	2221092653464723	4653433324365007	290	629	32	18017	PSMD11,USP22,VCP,OTUB1,RAD23A,PSMB3,PSME1,PSMB7,SHMT2,PSMB2,TNIP1,PSMF1,EIF3F,USP36,ACTB,SPATA2,TRRAP,JOSD1,PSMC5,MBD6,UBXN1,PSMD7,SKP2,PSMB4,EP300,PSMD13,CYLD,MCRS1,PSME2,CDC20,USP21,PSMD2
GO:BP	positive regulation of response to biotic stimulus	GO:0002833	2.5136e+16	4.5997e+16	246	629	29	18017	PSMD11,PUM2,SIN3A,DHX9,RAF1,PSMB3,PSME1,PSMB7,AP1G1,PSMB2,PSMF1,CYBA,SYK,GRN,PSMC5,PDPK1,PSMD7,ICAM2,FBXW11,HMGB2,PSMB4,RIPK2,EP300,PSMD13,UBE2K,HSPD1,PSME2,RIOK3,PSMD2
GO:BP	transcription, DNA-templated	GO:0006351	2.52244e+16	4598179599642251	3652	629	186	18017	BAZ2A,CHP1,CTNNB1,EZR,ECD,HLA-DRB1,MEPCE,PSMD11,HIPK3,NOP2,ORC1,EHMT2,SIN3A,SUPT5H,DHX9,USP22,CHCHD2,GATA1,KLF13,CXXC5,HBP1,NOLC1,RAF1,MTPN,TFDP2,CDK4,PFDN5,NAMPT,CCNT1,RTF1,ZNFX1,CTDSP1,NFIC,MYBL2,DRAP1,SLC39A8,ATF6,DNM2,C14ORF166,PRMT5,SHC1,THRAP3,SNRPD3,ZNF395,ARID2,RARA,PSMB3,POLR2H,PPRC1,SREBF2,PCBD1,BMPR2,DDX41,C1QBP,PSME1,IKZF5,ZNF142,GATAD2B,DPF2,ATP2B4,ADNP2,FLOT2,TXNIP,YWHAH,RGCC,PSMB7,…
GO:BP	response to abiotic stimulus	GO:0009628	2648089002128976	4577067422372851	1275	629	84	18017	CHP1,CASP3,PSMD11,NUP214,CHCHD2,VCP,SMC1A,NOLC1,RAF1,MTPN,CDK4,GPX1,NAMPT,GNAQ,P4HB,ACTN4,GRB2,DNM2,PSMB3,EIF4EBP1,PSME1,AKR1B1,EEF1D,RPA1,ATP2B4,HSP90AB1,TXNIP,RGCC,PSMB7,HTRA2,BCL2L1,ALAS1,RBM4,PSMB2,MDK,NUP153,GNB1,PSMF1,HSP90AA1,IER5,CYBA,NET1,ARNT,BRAF,DDB1,MYD88,HIPK2,TNFRSF1A,TXN,ATP1A1,JUNB,ENO1,PPP1CA,DNAJA2,ATF4,RAE1,NDRG1,PSMC5,TXN2,JUND,PGK1,PDPK1,PSMD7,NUP98,FOXO3,UCP2,BHLHE40,PSMB4,…
GO:BP	negative regulation of cell death	GO:0060548	2722998922464562	4564952530517467	1047	629	73	18017	CTNNB1,CASP3,HIPK3,SIN3A,ADAR,GATA1,RAF1,PTPN1,GPX1,DCPS,ITGA5,FXN,SHC1,RARA,PPIF,GSTP1,PSAP,SLC25A5,AKR1B1,CCND2,ADNP2,HSP90AB1,HTRA2,ANKLE2,BCL2L1,STRADB,MDK,BAG6,SERPINB2,BRAF,SRSF6,DDB1,ILK,PHB,MYD88,HIPK2,CHMP4B,FOXP1,GNAI2,STAT3,ARL6IP1,TXN,GRN,PRDX3,ENO1,ATF4,XBP1,PSMC5,CORO1A,PDPK1,SLC40A1,CHST11,FLNA,PIM2,MCL1,HMGB2,GATA2,ARF4,UCP2,CACYBP,RIPK2,HSPA5,TNFRSF1B,FOXO1,HSPD1,PPP1R10,SQSTM1,P…
GO:BP	modification-dependent protein catabolic process	GO:0019941	2.73138e+16	4563618425807674	655	629	53	18017	CTNNB1,PSMD11,ARMC8,USP22,VCP,DDA1,RAD23A,DERL1,PSMB3,PSME1,BUB3,HSP90AB1,PSMB7,PCNP,PSMB2,ZNRF1,PSMF1,BAG6,USP36,DDB1,HIPK2,UBR4,ZFAND2A,KCTD10,RNF130,ANAPC16,EDEM1,XBP1,UBE2G2,PSMC5,UBXN1,PSMD7,SKP2,FBXW11,CSNK1A1,PSMB4,SGTA,COPS3,PML,PSMD13,CYLD,HSPA5,MTA1,RNF4,UBE2K,ARIH1,SQSTM1,PSME2,RNF216,PTK2B,CDC20,USP21,PSMD2
GO:BP	RNA splicing	GO:0008380	273680696805044	4562755833085635	457	629	42	18017	ECD,DHX9,PTBP1,DCPS,C14ORF166,PRMT5,THRAP3,SNRPD3,POLR2H,DDX41,C1QBP,PRPF38B,SNRPA,SMU1,RBM4,AAR2,SRSF9,CLK3,RBM22,SRSF6,KHSRP,DDX39A,SRSF1,YBX1,KHDRBS1,STRAP,RALY,PRPF19,SRRM2,NUP98,RBM8A,CDK13,SF3A1,POLR2G,SNRPA1,SNRPC,PPP2CA,DDX39B,REST,CLK2,TRA2A,U2AF2
GO:BP	tumor necrosis factor-mediated signaling pathway	GO:0033209	3.10523e+16	4507906466099965	177	629	24	18017	PSMD11,ACTN4,PSMB3,GSTP1,PSME1,PSMB7,GPS2,PSMB2,PSMF1,ILK,TNFRSF1A,SPATA2,SYK,PSMC5,PSMD7,FOXO3,PSMB4,PSMD13,CYLD,TNFRSF1B,UBE2K,PSME2,PTK2B,PSMD2
GO:BP	mRNA splicing, via spliceosome	GO:0000398	3126190494823162	4504984561719944	358	629	36	18017	DHX9,PTBP1,DCPS,PRMT5,THRAP3,SNRPD3,POLR2H,DDX41,C1QBP,PRPF38B,SNRPA,SMU1,RBM4,AAR2,SRSF9,RBM22,SRSF6,DDX39A,SRSF1,YBX1,KHDRBS1,STRAP,RALY,PRPF19,SRRM2,NUP98,RBM8A,CDK13,SF3A1,POLR2G,SNRPA1,SNRPC,DDX39B,REST,TRA2A,U2AF2
GO:BP	RNA splicing, via transesterification reactions with bulged adenosine as nucleophile	GO:0000377	3126190494823162	4504984561719944	358	629	36	18017	DHX9,PTBP1,DCPS,PRMT5,THRAP3,SNRPD3,POLR2H,DDX41,C1QBP,PRPF38B,SNRPA,SMU1,RBM4,AAR2,SRSF9,RBM22,SRSF6,DDX39A,SRSF1,YBX1,KHDRBS1,STRAP,RALY,PRPF19,SRRM2,NUP98,RBM8A,CDK13,SF3A1,POLR2G,SNRPA1,SNRPC,DDX39B,REST,TRA2A,U2AF2
GO:BP	regulation of transcription, DNA-templated	GO:0006355	3410860291730341	4467136068857974	3467	629	178	18017	BAZ2A,CHP1,CTNNB1,EZR,ECD,HLA-DRB1,MEPCE,PSMD11,NOP2,ORC1,EHMT2,SIN3A,SUPT5H,DHX9,USP22,CHCHD2,GATA1,KLF13,CXXC5,HBP1,NOLC1,RAF1,MTPN,TFDP2,PFDN5,NAMPT,CCNT1,RTF1,ZNFX1,CTDSP1,NFIC,MYBL2,DRAP1,SLC39A8,ATF6,DNM2,C14ORF166,PRMT5,SHC1,THRAP3,ZNF395,ARID2,RARA,PSMB3,PPRC1,SREBF2,PCBD1,BMPR2,DDX41,C1QBP,PSME1,IKZF5,ZNF142,GATAD2B,DPF2,ATP2B4,ADNP2,FLOT2,TXNIP,YWHAH,RGCC,PSMB7,H1FX,MED6,IRF9,WBP2,GPS2,…
GO:BP	cellular response to stimulus	GO:0051716	3589986122276254	4444907230260259	7777	629	340	18017	CHP1,AP1M1,CTNNB1,EZR,FCGR2A,INPP5D,AP2M1,CASP3,HLA-DRB1,PSMD11,HIPK3,NOP2,NUP214,PUM2,EHMT2,SIN3A,DHX9,PPP4C,ADAR,CHCHD2,GATA1,STOML2,VCP,PTBP1,SMC1A,TRAF7,CXXC5,HBP1,LAMTOR1,RAF1,MTPN,TFDP2,CDK4,PTPN1,GPX1,CAPZA1,PFDN5,TPP1,NAMPT,PTPRE,DCPS,PI4KB,RTF1,MYH9,GNAQ,LIMK1,ITGA5,STIP1,P4HB,ACTN4,GRB2,BSG,MYBL2,PLEKHM1,ATP6AP2,LIG1,SLC20A1,ARHGAP1,ATF6,FXN,OTUB1,DNM2,RAD23A,DERL1,GLUL,IFITM2,PRMT5,SHC…
GO:BP	regulation of biological process	GO:0050789	4031174651108671	4394568385580607	12038	629	483	18017	BAZ2A,CHP1,PAFAH1B2,CTNNB1,EZR,FCGR2A,ECD,INPP5D,AP2M1,CASP3,HLA-DRB1,MEPCE,PSMD11,HIPK3,NOP2,ORC1,NUP214,ATG3,PUM2,EHMT2,SIN3A,SUPT5H,DHX9,PPP4C,ADAR,USP22,CHCHD2,GATA1,STOML2,VCP,KLF13,PDLIM7,PTBP1,TRAF7,CXXC5,HBP1,LAMTOR1,NOLC1,RAF1,MTPN,KPNA4,TFDP2,CDK4,DDA1,PTPN1,GPX1,CAPZA1,PFDN5,QSOX1,TPP1,NAMPT,PTPRE,KCNAB2,DCPS,CCNT1,HDLBP,PI4KB,RTF1,ZNFX1,MYH9,CTDSP1,GNAQ,LIMK1,ITGA5,NFIC,P4HB,ACTN4,GRB…
GO:BP	heterocycle catabolic process	GO:0046700	4.3052e+16	4366006730335181	608	629	50	18017	CASP3,PSMD11,NUP214,PUM2,DHX9,VCP,GPX1,DCPS,NT5C2,THRAP3,PSMB3,RNASE2,PSME1,PSMB7,PSMB2,PSMF1,KHSRP,DROSHA,MYD88,YBX1,RPL8,NAF1,PSMC5,EIF3E,EXOSC1,PSMD7,ZC3HAV1,MBD4,IGF2BP2,RBM8A,HMGB2,RPS18,POLR2G,RPS5,PSMB4,KPNA1,PSMD13,RPL3,TNFRSF1B,SAMD4B,PPP2CA,GTPBP1,PSME2,RPL36A,PDE7A,RPL24,HSPB1,CNOT2,PSMD2,NPM1
GO:BP	cellular nitrogen compound catabolic process	GO:0044270	4539163502826055	4343024173481817	609	629	50	18017	CASP3,PSMD11,NUP214,PUM2,DHX9,VCP,GPX1,DCPS,NT5C2,THRAP3,PSMB3,RNASE2,PSME1,PSMB7,PSMB2,PSMF1,KHSRP,DROSHA,MYD88,YBX1,RPL8,NAF1,PSMC5,EIF3E,EXOSC1,PSMD7,ZC3HAV1,MBD4,IGF2BP2,RBM8A,HMGB2,RPS18,POLR2G,RPS5,PSMB4,KPNA1,PSMD13,RPL3,TNFRSF1B,SAMD4B,PPP2CA,GTPBP1,PSME2,RPL36A,PDE7A,RPL24,HSPB1,CNOT2,PSMD2,NPM1
GO:BP	modification-dependent macromolecule catabolic process	GO:0043632	4.77936e+16	4320630639630198	666	629	53	18017	CTNNB1,PSMD11,ARMC8,USP22,VCP,DDA1,RAD23A,DERL1,PSMB3,PSME1,BUB3,HSP90AB1,PSMB7,PCNP,PSMB2,ZNRF1,PSMF1,BAG6,USP36,DDB1,HIPK2,UBR4,ZFAND2A,KCTD10,RNF130,ANAPC16,EDEM1,XBP1,UBE2G2,PSMC5,UBXN1,PSMD7,SKP2,FBXW11,CSNK1A1,PSMB4,SGTA,COPS3,PML,PSMD13,CYLD,HSPA5,MTA1,RNF4,UBE2K,ARIH1,SQSTM1,PSME2,RNF216,PTK2B,CDC20,USP21,PSMD2
GO:BP	viral gene expression	GO:0019080	4884701160035975	4311162000730734	195	629	25	18017	NUP214,SUPT5H,DHX9,PTBP1,CCNT1,POLR2H,NUP153,EIF3F,PFN1,EIF3D,RPL8,EIF3A,RAE1,NUP98,IFITM3,EIF3B,RPS18,POLR2G,RPS5,EP300,RPL3,EIF3L,REST,RPL36A,RPL24
GO:BP	Fc receptor signaling pathway	GO:0038093	5170031026238759	4286506850622914	239	629	28	18017	FCGR2A,PSMD11,LIMK1,GRB2,SHC1,PSMB3,PSME1,HSP90AB1,PSMB7,ARPC1B,PSMB2,PSMF1,HSP90AA1,BRK1,ACTB,ARPC2,ACTR3,SYK,FGR,PSMC5,PDPK1,PSMD7,FBXW11,PSMB4,PSMD13,PSME2,WASF2,PSMD2
GO:BP	regulation of organelle organization	GO:0033043	6073025924579104	4216594864953903	1320	629	85	18017	CTNNB1,EZR,ATG3,EHMT2,SIN3A,MTPN,TFDP2,GPX1,CAPZA1,RTF1,LIMK1,GRB2,VDAC1,FXN,OTUB1,CCT3,DNM2,PRMT5,PPIF,SREBF2,SLC25A5,YLPM1,PHPT1,BUB3,YWHAH,RGCC,HTRA2,BCL2L1,CDC37,H1FX,WBP2,ARPC1B,ARHGAP17,CLTC,FSCN1,MDK,BRK1,USP36,BRAF,ILK,YWHAQ,ARPC2,ACTR3,PFN1,CHMP4B,ARL6IP1,GRN,NAF1,ENO1,SH3BP1,RAE1,CORO1A,ARF1,RHOH,SKI,RAC2,DIAPH1,FLNA,CDK13,GATA2,ZEB2,CCDC88A,SURF4,EP300,ATXN2L,KAT7,PML,RHOB,CYLD,TRIOBP,…
GO:BP	response to nitrogen compound	GO:1901698	6159042360855788	4.21049e+16	1172	629	78	18017	CTNNB1,EZR,CASP3,EHMT2,SIN3A,DHX9,VCP,LAMTOR1,CDK4,PTPN1,NAMPT,PTPRE,GNAQ,GRB2,BSG,DNM2,HADHA,DERL1,PRMT5,SHC1,NDEL1,ATP6V1B2,SREBF2,GSTP1,EIF4EBP1,AKR1B1,ATP2B4,HSP90AB1,BCL2L1,SHMT2,PSMB2,SRSF9,GNB1,SYAP1,UROS,BAG6,CYBA,BRAF,SRSF6,ACTB,PHB,MYD88,GNAI2,STAT3,SYK,TXN,GGH,JUNB,EDEM1,LDLR,ATF4,XBP1,UBE2G2,JUND,PDPK1,ITGB2,UBXN1,CD81,DIAPH1,FLNA,FOXO3,ADIPOR1,UCP2,CACYBP,RIPK2,SGTA,KAT7,SNX5,HSPA5,F…
GO:BP	hematopoietic or lymphoid organ development	GO:0048534	6178645842747439	4209106697640018	986	629	69	18017	CTNNB1,INPP5D,CASP3,HLA-DRB1,PSMD11,SIN3A,ADAR,GATA1,KLF13,RAF1,KCNAB2,MYH9,RARA,PSMB3,PSAP,PSME1,DPF2,PRMT1,PSMB7,ALAS1,TIPARP,GPS2,PSMB2,MDK,PSMF1,KLF6,SOX12,ARNT,BRAF,DROSHA,HIPK2,FOXP1,STAT3,SYK,JUNB,PRDX3,CCNB2,ATF4,TYROBP,CSF3R,XBP1,PSMC5,RHOH,PSMD7,SLC40A1,CD81,FOXO3,LILRB4,CDK13,HMGB2,GATA2,PSMB4,RIPK2,SATB1,EP300,KAT7,PML,PSMD13,PTPN6,CYLD,NFKB2,PREX1,PPP2R3C,PSME2,REST,PTK2B,WASF2,H3F3A…
GO:BP	positive regulation of response to external stimulus	GO:0032103	638066474325456	4195134073741439	524	629	45	18017	PSMD11,PUM2,SIN3A,DHX9,RAF1,PSMB3,NDEL1,BMPR2,C1QBP,PSME1,PSMB7,AP1G1,PSMB2,MDK,TNIP1,PSMF1,CYBA,BRAF,CTSC,MYD88,TNFRSF1A,STAT3,SYK,GRN,LDLR,PSMC5,PDPK1,PSMD7,ICAM2,RAC2,CD81,FBXW11,HMGB2,PSMB4,RIPK2,EP300,PSMD13,UBE2K,HSPD1,IL17RA,PSME2,PTK2B,RIOK3,HSPB1,PSMD2
GO:BP	response to hypoxia	GO:0001666	6388333156832907	4.19461e+16	368	629	36	18017	CASP3,PSMD11,CHCHD2,RAF1,P4HB,ACTN4,PSMB3,EIF4EBP1,PSME1,RGCC,PSMB7,ALAS1,PSMB2,GNB1,PSMF1,CYBA,ARNT,HIPK2,ENO1,NDRG1,PSMC5,TXN2,PGK1,PSMD7,FOXO3,UCP2,PSMB4,EP300,PML,PSMD13,HSPD1,PSME2,REST,PTK2B,ADM,PSMD2
GO:BP	translational initiation	GO:0006413	7362873821824045	4132952641999883	199	629	25	18017	EIF3C,EIF4EBP1,RBM4,EIF3F,EIF4H,EIF5,EIF1B,EIF3D,KHDRBS1,RPL8,EIF3A,PPP1CA,ATF4,EIF3E,EIF3M,EIF3B,RPS18,POLR2G,RPS5,RPL3,EIF3L,RPL36A,RPL24,HSPB1,NPM1
GO:BP	phosphate-containing compound metabolic process	GO:0006796	8096894515275204	4091681518588748	3408	629	174	18017	CHP1,CTNNB1,EZR,INPP5D,CASP3,HLA-DRB1,PSMD11,HIPK3,NUP214,PPP4C,ADAR,GATA1,STOML2,VCP,PTBP1,TRAF7,LAMTOR1,RAF1,CDK4,PTPN1,GPX1,NAMPT,PTPRE,CCNT1,PI4KB,CTDSP1,GNAQ,LIMK1,ITGA5,GRB2,NT5C2,ATP6AP2,SLC20A1,UQCRC2,ACSL3,FXN,HADHA,C14ORF166,PRMT5,SHC1,RARA,PSMB3,PGAM1,PPIF,GSTP1,PSAP,BMPR2,PSME1,CCND2,GPS1,PHPT1,PRMT1,CORO1C,ATP2B4,HSP90AB1,RGCC,PSMB7,ANKLE2,CDC37,SIRPA,SHMT2,BCKDK,TALDO1,NDUFB9,JAK1,G…
GO:BP	proteolysis	GO:0006508	8240663717787253	4.08404e+16	1837	629	108	18017	CTNNB1,TPP2,CASP3,PSMD11,ARMC8,USP22,STOML2,VCP,RAF1,DDA1,GPX1,TPP1,MYH9,ATP6AP2,UQCRC2,FXN,OTUB1,CAPNS1,RAD23A,DERL1,PSMB3,NDEL1,PSME1,GPS1,BUB3,HSP90AB1,PSMB7,HTRA2,SHMT2,PCNP,PSMB2,CAPN1,CST3,CTSD,TNIP1,ZNRF1,PSMF1,BAG6,EIF3F,CTSZ,USP36,SERPINB2,DDB1,ACTB,CTSC,HIPK2,UBR4,CHMP4B,ZFAND2A,STAT3,KCTD10,ARL6IP1,SPATA2,SYK,RNF130,GGH,TRRAP,GRN,ANAPC16,EDEM1,PRDX3,JOSD1,ENO1,ANPEP,XBP1,UBE2G2,PSMC5,P…
GO:BP	translation	GO:0006412	8279375722258056	4082002408456629	754	629	57	18017	MRPL38,PUM2,DHX9,PTBP1,NOLC1,MTPN,CDK4,EIF3C,RARA,C1QBP,EIF4EBP1,EEF1D,SHMT2,RBM4,TNIP1,FARSA,EIF3F,UNK,EIF4H,EIF5,KHSRP,EIF1B,EIF3D,STAT3,CAPRIN1,YBX1,KHDRBS1,PTCD3,RPL8,EIF3A,PPP1CA,ATF4,EIF3E,EIF5A,EIF3M,FOXO3,IGF2BP2,RBM8A,EIF3B,RPS18,POLR2G,RPS5,RPL3,MRPL53,EIF3L,SAMD4B,PA2G4,DDX39B,GTPBP1,NGDN,PTK2B,RPL36A,RPL24,HSPB1,CNOT2,GFM1,NPM1
GO:BP	secretion by cell	GO:0032940	9133288807275072	4039372809140356	1484	629	92	18017	CHP1,PAFAH1B2,AP1M1,EZR,FCGR2A,HLA-DRB1,PSMD11,ARMC8,DHX9,VCP,LAMTOR1,RAF1,QSOX1,KCNAB2,MYH9,ACTN4,ATP6AP2,TRAPPC1,GLUL,PGAM1,GSTP1,PSAP,RAB5C,SLC25A5,RNASE2,PHPT1,HSP90AB1,RGCC,PSMB7,AP1G1,SIRPA,ARHGAP17,CAPN1,CST3,CTSD,HSP90AA1,CYBA,CTSZ,BRAF,CTSC,CMTM6,BIN2,UBR4,GNAI2,TNFRSF1A,STAT3,ARL8A,SYK,GGH,GRN,STX11,FGR,C2CD2L,ANPEP,KCNN4,TYROBP,XBP1,CORO1A,ARF1,PDPK1,ITGB2,PSMD7,RAC2,DIAPH1,FLNA,CDK13,…
GO:BP	regulation of mRNA stability	GO:0043488	9170802479236386	4037592660289008	187	629	24	18017	PSMD11,NUP214,PUM2,DHX9,THRAP3,PSMB3,PSME1,PSMB7,PSMB2,PSMF1,KHSRP,MYD88,YBX1,PSMC5,EXOSC1,PSMD7,IGF2BP2,PSMB4,PSMD13,SAMD4B,PSME2,HSPB1,PSMD2,NPM1
GO:BP	negative regulation of response to stimulus	GO:0048585	917517028321162	4037385866871741	1773	629	105	18017	CHP1,CTNNB1,EZR,INPP5D,HLA-DRB1,PSMD11,HIPK3,ADAR,GATA1,VCP,RAF1,PTPN1,GPX1,PFDN5,NAMPT,PTPRE,GRB2,FXN,OTUB1,DNM2,PSMB3,PPIF,GSTP1,PSAP,SLC25A5,C1QBP,PSME1,GPS1,PHPT1,ATP2B4,TTLL12,PSMB7,CERS2,HTRA2,BCL2L1,SIRPA,GPS2,PSMB2,STRADB,MDK,TNIP1,PSMF1,SERPINB2,ARRDC3,MAP2K3,PHB,HIPK2,FOXP1,GNAI2,TNFRSF1A,KCTD10,TXN,YBX1,GRN,EIF3A,ENO1,SH3BP1,LDLR,ATF4,XBP1,UBE2G2,PSMC5,STRAP,SCYL2,TLE3,RHOH,PDPK1,UBXN1…
GO:BP	regulation of cellular amino acid metabolic process	GO:0006521	969862201452312	4.01329e+16	65	629	14	18017	PSMD11,PSMB3,PSME1,ATP2B4,PSMB7,PSMB2,PSMF1,ODC1,PSMC5,PSMD7,PSMB4,PSMD13,PSME2,PSMD2
GO:BP	mRNA processing	GO:0006397	1.05724e+16	3975826139412166	533	629	45	18017	ECD,SUPT5H,DHX9,ADAR,PTBP1,DCPS,CCNT1,PRMT5,THRAP3,SNRPD3,POLR2H,DDX41,C1QBP,PRPF38B,SNRPA,SMU1,RBM4,AAR2,SRSF9,RBM22,SRSF6,KHSRP,DDX39A,SRSF1,YBX1,KHDRBS1,RPRD2,STRAP,RALY,PRPF19,SRRM2,NUP98,RBM8A,SLBP,CDK13,SF3A1,POLR2G,CPSF6,SNRPA1,SNRPC,CCNH,DDX39B,REST,TRA2A,U2AF2
GO:BP	regulation of developmental process	GO:0050793	1.08237e+16	3.96562e+16	2833	629	150	18017	CTNNB1,EZR,INPP5D,AP2M1,HLA-DRB1,PSMD11,SIN3A,GATA1,KLF13,PDLIM7,PTBP1,RAF1,MTPN,CDK4,GPX1,NAMPT,MYH9,CTDSP1,LIMK1,ITGA5,P4HB,ACTN4,FXN,NUMB,DNM2,GLUL,PRMT5,RARA,PSMB3,NDEL1,BMPR2,C1QBP,PSME1,DPF2,PRMT1,CORO1C,ATP2B4,FLOT2,HSP90AB1,YWHAH,RGCC,PSMB7,CERS2,HTRA2,RBM4,JAK1,CLTC,GPS2,PSMB2,CST3,MDK,SYAP1,PSMF1,SOX12,BAG6,CTSZ,GNA13,ARNT,BRAF,SRSF6,ILK,CTSC,ARPC2,DROSHA,HIPK2,PFN1,FOXP1,TNFRSF1A,STAT3…
GO:BP	stimulatory C-type lectin receptor signaling pathway	GO:0002223	1.10656e+16	3.95602e+16	110	629	18	18017	PSMD11,RAF1,PSMB3,PSME1,PSMB7,PSMB2,PSMF1,SYK,PSMC5,PDPK1,PSMD7,ICAM2,FBXW11,PSMB4,EP300,PSMD13,PSME2,PSMD2
GO:BP	regulation of mitotic cell cycle	GO:0007346	1.15828e+16	3.93619e+16	665	629	52	18017	CTNNB1,ECD,MEPCE,PSMD11,ORC1,SIN3A,USP22,TFDP2,CDK4,CTDSP1,PRMT5,PSMB3,EIF4EBP1,PSME1,CCND2,PRMT1,BUB3,RGCC,TTLL12,PSMB7,BCL2L1,CLTC,PSMB2,PSMF1,HSP90AA1,DDB1,CHMP4B,ANAPC16,RAE1,PSMC5,PSMD7,SSNA1,PIM2,CDK13,TIMP2,PSMB4,EP300,PLAGL1,PML,PSMD13,PTPN6,CYLD,MAD2L1BP,PPP1R10,PSME2,CTDSP2,SH2B1,RPL24,CDC20,CNOT2,PSMD2,TOP2B
GO:BP	export from cell	GO:0140352	1.21148e+16	3916681988232544	1537	629	94	18017	CHP1,PAFAH1B2,AP1M1,EZR,FCGR2A,HLA-DRB1,PSMD11,ARMC8,DHX9,VCP,LAMTOR1,RAF1,QSOX1,KCNAB2,MYH9,ACTN4,ATP6AP2,TRAPPC1,GLUL,PGAM1,GSTP1,PSAP,RAB5C,SLC25A5,RNASE2,PHPT1,HSP90AB1,RGCC,PSMB7,AP1G1,SIRPA,ARHGAP17,CAPN1,CST3,CTSD,HSP90AA1,CYBA,CTSZ,BRAF,CTSC,CMTM6,BIN2,UBR4,GNAI2,TNFRSF1A,STAT3,ARL8A,SYK,GGH,ATP1A1,GRN,STX11,FGR,C2CD2L,ANPEP,KCNN4,TYROBP,XBP1,CORO1A,ARF1,PDPK1,ITGB2,PSMD7,SLC40A1,RAC2,DIA…
GO:BP	peptide metabolic process	GO:0006518	1.2332e+16	3.90897e+16	922	629	65	18017	CASP3,MRPL38,PUM2,DHX9,PTBP1,NOLC1,MTPN,CDK4,GPX1,TPP1,ATP6AP2,EIF3C,RARA,GSTP1,C1QBP,EIF4EBP1,EEF1D,SHMT2,RBM4,TNIP1,FARSA,EIF3F,UNK,CTSZ,EIF4H,EIF5,KHSRP,EIF1B,EIF3D,STAT3,CAPRIN1,YBX1,KHDRBS1,PTCD3,RPL8,EIF3A,PPP1CA,ANPEP,ATF4,EIF3E,EIF5A,EIF3M,FOXO3,IGF2BP2,RBM8A,EIF3B,RPS18,POLR2G,RPS5,RPL3,MRPL53,EIF3L,NCSTN,SAMD4B,PA2G4,DDX39B,GTPBP1,NGDN,PTK2B,RPL36A,RPL24,HSPB1,CNOT2,GFM1,NPM1
GO:BP	response to organonitrogen compound	GO:0010243	1.26237e+16	3898813471429118	1087	629	73	18017	CTNNB1,EZR,CASP3,EHMT2,SIN3A,VCP,LAMTOR1,CDK4,PTPN1,NAMPT,PTPRE,GRB2,BSG,DNM2,HADHA,DERL1,PRMT5,SHC1,NDEL1,ATP6V1B2,SREBF2,GSTP1,EIF4EBP1,AKR1B1,ATP2B4,HSP90AB1,BCL2L1,SHMT2,PSMB2,SRSF9,GNB1,SYAP1,UROS,BAG6,CYBA,BRAF,SRSF6,ACTB,PHB,MYD88,GNAI2,STAT3,SYK,GGH,JUNB,EDEM1,LDLR,ATF4,XBP1,UBE2G2,JUND,PDPK1,ITGB2,UBXN1,CD81,DIAPH1,FLNA,FOXO3,ADIPOR1,UCP2,CACYBP,RIPK2,SGTA,KAT7,SNX5,HSPA5,FOXO1,HSPD1,NCS…
GO:BP	establishment of protein localization to organelle	GO:0072594	1.26717e+16	3897165470670198	573	629	47	18017	CHP1,AP2M1,NUP214,TOMM40,NOLC1,KPNA4,TFDP2,SEC61A1,UQCRC2,NUMB,CCT3,DNM2,TIMM23,SREBF2,HSP90AB1,TXNIP,YWHAH,HTRA2,NUP153,HSP90AA1,TNPO3,RBM22,USP36,YWHAQ,CHMP4B,STAT3,SYK,RPL8,RAC2,SRP72,FLNA,NUP98,RPS18,RPS5,SGTA,KPNA1,PML,HSPA5,RPL3,TOMM34,FAM53C,TOMM22,HSD17B4,HSPD1,PPP1R10,RPL36A,RPL24
GO:BP	phosphorus metabolic process	GO:0006793	1399872410429691	3853911545729947	3434	629	174	18017	CHP1,CTNNB1,EZR,INPP5D,CASP3,HLA-DRB1,PSMD11,HIPK3,NUP214,PPP4C,ADAR,GATA1,STOML2,VCP,PTBP1,TRAF7,LAMTOR1,RAF1,CDK4,PTPN1,GPX1,NAMPT,PTPRE,CCNT1,PI4KB,CTDSP1,GNAQ,LIMK1,ITGA5,GRB2,NT5C2,ATP6AP2,SLC20A1,UQCRC2,ACSL3,FXN,HADHA,C14ORF166,PRMT5,SHC1,RARA,PSMB3,PGAM1,PPIF,GSTP1,PSAP,BMPR2,PSME1,CCND2,GPS1,PHPT1,PRMT1,CORO1C,ATP2B4,HSP90AB1,RGCC,PSMB7,ANKLE2,CDC37,SIRPA,SHMT2,BCKDK,TALDO1,NDUFB9,JAK1,G…
GO:BP	regulation of cell differentiation	GO:0045595	1.64266e+16	3.78445e+16	1976	629	113	18017	CTNNB1,INPP5D,HLA-DRB1,PSMD11,SIN3A,GATA1,KLF13,PDLIM7,PTBP1,RAF1,CTDSP1,LIMK1,P4HB,ACTN4,NUMB,DNM2,PRMT5,RARA,PSMB3,NDEL1,BMPR2,C1QBP,PSME1,DPF2,PRMT1,CORO1C,FLOT2,HSP90AB1,YWHAH,RGCC,PSMB7,CERS2,RBM4,GPS2,PSMB2,MDK,SYAP1,PSMF1,SOX12,CTSZ,ARNT,BRAF,SRSF6,ILK,ARPC2,DROSHA,FOXP1,TNFRSF1A,STAT3,SYK,CAPRIN1,GRN,JUNB,LDLR,ATF4,TYROBP,CSF3R,XBP1,PSMC5,STRAP,JUND,ARF1,RHOH,PRPF19,SPRED2,PSMD7,SKI,RHEB,…
GO:BP	innate immune response activating cell surface receptor signaling pathway	GO:0002220	1697832840376672	3770105070320349	113	629	18	18017	PSMD11,RAF1,PSMB3,PSME1,PSMB7,PSMB2,PSMF1,SYK,PSMC5,PDPK1,PSMD7,ICAM2,FBXW11,PSMB4,EP300,PSMD13,PSME2,PSMD2
GO:BP	regulation of translation	GO:0006417	1.94671e+16	3710698615393295	454	629	40	18017	PUM2,DHX9,PTBP1,NOLC1,MTPN,CDK4,EIF3C,RARA,C1QBP,EIF4EBP1,SHMT2,RBM4,UNK,EIF4H,EIF5,KHSRP,EIF1B,EIF3D,STAT3,CAPRIN1,YBX1,KHDRBS1,PTCD3,PPP1CA,ATF4,EIF3E,EIF5A,FOXO3,IGF2BP2,RBM8A,EIF3B,POLR2G,SAMD4B,PA2G4,DDX39B,NGDN,PTK2B,HSPB1,CNOT2,NPM1
GO:BP	innate immune response-activating signal transduction	GO:0002758	1.95168e+16	3.70959e+16	114	629	18	18017	PSMD11,RAF1,PSMB3,PSME1,PSMB7,PSMB2,PSMF1,SYK,PSMC5,PDPK1,PSMD7,ICAM2,FBXW11,PSMB4,EP300,PSMD13,PSME2,PSMD2
GO:BP	positive regulation of cell communication	GO:0010647	1.97625e+16	3704157728447039	1914	629	110	18017	CTNNB1,HLA-DRB1,PSMD11,PUM2,DHX9,VCP,PTBP1,TRAF7,CXXC5,LAMTOR1,RAF1,TFDP2,PTPN1,GPX1,ITGA5,ACTN4,GRB2,ATP6AP2,SLC20A1,ATF6,GLUL,PRMT5,SHC1,PSMB3,ZDHHC3,PPIF,PSAP,BMPR2,C1QBP,PSME1,AKR1B1,EEF1D,PHPT1,PRMT1,HSP90AB1,YWHAH,RGCC,PSMB7,HTRA2,BCL2L1,WBP2,GPS2,LRRC59,PSMB2,PSMF1,HSP90AA1,PIK3AP1,CYBA,NET1,ARNT,BRAF,ILK,CTSC,YWHAQ,MAP2K3,PHB,MYD88,HIPK2,FOXP1,GNAI2,TNFRSF1A,STAT3,SIK3,SYK,TXN,FKBP1A,FGR,…
GO:BP	cellular response to decreased oxygen levels	GO:0036294	1.98935e+16	3.70129e+16	224	629	26	18017	PSMD11,CHCHD2,NAMPT,P4HB,PSMB3,EIF4EBP1,PSME1,RGCC,PSMB7,PSMB2,GNB1,PSMF1,ARNT,HIPK2,ENO1,ATF4,NDRG1,PSMC5,PGK1,PSMD7,FOXO3,PSMB4,EP300,PSMD13,PSME2,PSMD2
GO:BP	immune system development	GO:0002520	2.23694e+16	3650346349144917	1040	629	70	18017	CTNNB1,INPP5D,CASP3,HLA-DRB1,PSMD11,SIN3A,ADAR,GATA1,KLF13,RAF1,KCNAB2,MYH9,RARA,PSMB3,PSAP,PSME1,DPF2,PRMT1,PSMB7,ALAS1,TIPARP,GPS2,PSMB2,MDK,PSMF1,KLF6,SOX12,ARNT,BRAF,DROSHA,HIPK2,FOXP1,STAT3,SYK,JUNB,PRDX3,CCNB2,ATF4,TYROBP,CSF3R,XBP1,PSMC5,RHOH,PSMD7,SLC40A1,CD81,FOXO3,LILRB4,CDK13,HMGB2,GATA2,PSMB4,RIPK2,SATB1,EP300,KAT7,PML,PSMD13,PTPN6,CYLD,NFKB2,HSPD1,PREX1,PPP2R3C,PSME2,REST,PTK2B,WASF2…
GO:BP	cytoplasmic translation	GO:0002181	2.29268e+16	363965570692573	103	629	17	18017	DHX9,EIF3C,EIF4EBP1,RBM4,EIF3F,UNK,EIF4H,EIF5,EIF3D,RPL8,EIF3A,EIF3E,EIF3M,EIF3B,EIF3L,RPL36A,RPL24
GO:BP	positive regulation of signaling	GO:0023056	2.32387e+16	3.63379e+16	1920	629	110	18017	CTNNB1,HLA-DRB1,PSMD11,PUM2,DHX9,VCP,PTBP1,TRAF7,CXXC5,LAMTOR1,RAF1,TFDP2,PTPN1,GPX1,ITGA5,ACTN4,GRB2,ATP6AP2,SLC20A1,ATF6,GLUL,PRMT5,SHC1,PSMB3,ZDHHC3,PPIF,PSAP,BMPR2,C1QBP,PSME1,AKR1B1,EEF1D,PHPT1,PRMT1,HSP90AB1,YWHAH,RGCC,PSMB7,HTRA2,BCL2L1,WBP2,GPS2,LRRC59,PSMB2,PSMF1,HSP90AA1,PIK3AP1,CYBA,NET1,ARNT,BRAF,ILK,CTSC,YWHAQ,MAP2K3,PHB,MYD88,HIPK2,FOXP1,GNAI2,TNFRSF1A,STAT3,SIK3,SYK,TXN,FKBP1A,FGR,…
GO:BP	peptide biosynthetic process	GO:0043043	2.41341e+16	3.61737e+16	778	629	57	18017	MRPL38,PUM2,DHX9,PTBP1,NOLC1,MTPN,CDK4,EIF3C,RARA,C1QBP,EIF4EBP1,EEF1D,SHMT2,RBM4,TNIP1,FARSA,EIF3F,UNK,EIF4H,EIF5,KHSRP,EIF1B,EIF3D,STAT3,CAPRIN1,YBX1,KHDRBS1,PTCD3,RPL8,EIF3A,PPP1CA,ATF4,EIF3E,EIF5A,EIF3M,FOXO3,IGF2BP2,RBM8A,EIF3B,RPS18,POLR2G,RPS5,RPL3,MRPL53,EIF3L,SAMD4B,PA2G4,DDX39B,GTPBP1,NGDN,PTK2B,RPL36A,RPL24,HSPB1,CNOT2,GFM1,NPM1
GO:BP	response to endogenous stimulus	GO:0009719	2555936387928478	3592449959087747	1696	629	100	18017	CTNNB1,EZR,CASP3,EHMT2,SIN3A,GATA1,PTBP1,SMC1A,LAMTOR1,CDK4,PTPN1,NAMPT,PTPRE,GRB2,BSG,DNM2,HADHA,PRMT5,SHC1,RARA,NDEL1,POLR2H,ATP6V1B2,FIBP,SREBF2,GSTP1,BMPR2,EIF4EBP1,AKR1B1,ATP2B4,HSP90AB1,TXNIP,YWHAH,RAB35,BCL2L1,SHMT2,WBP2,ARPC1B,ABHD2,MDK,GNB1,SYAP1,UROS,CYBA,BRAF,SRSF6,ACTB,ILK,PHB,MYD88,HIPK2,FOXP1,GNAI2,STAT3,SYK,GGH,ATP1A1,JUNB,LDLR,ATF4,XBP1,STRAP,TXN2,CORO1A,JUND,PDPK1,ITGB2,SPRED2,SK…
GO:BP	cellular response to oxygen levels	GO:0071453	2557580916864599	3.59217e+16	242	629	27	18017	PSMD11,CHCHD2,NAMPT,P4HB,PSMB3,EIF4EBP1,PSME1,RGCC,PSMB7,PSMB2,GNB1,PSMF1,ARNT,HIPK2,ENO1,ATF4,NDRG1,PSMC5,PGK1,PSMD7,FOXO3,PSMB4,EP300,PSMD13,FOXO1,PSME2,PSMD2
GO:BP	mitotic cell cycle phase transition	GO:0044772	2638007592690404	3.57872e+16	606	629	48	18017	ECD,MEPCE,PSMD11,ORC1,SIN3A,TFDP2,CDK4,CTDSP1,DNM2,PSMB3,EIF4EBP1,PSME1,CCND2,RPA1,PRMT1,BUB3,RGCC,PSMB7,PSMB2,PSMF1,HSP90AA1,DDB1,CHMP4B,MASTL,KHDRBS1,ANAPC16,CCNB2,PSMC5,MCM5,PSMD7,SSNA1,SKP2,FBXW11,PIM2,PSMB4,EP300,PLAGL1,PML,PSMD13,PTPN6,MAD2L1BP,CCNH,PSME2,CTDSP2,RPL24,CDC20,CNOT2,PSMD2
GO:BP	regulation of cellular amide metabolic process	GO:0034248	2749081638046069	3.56081e+16	514	629	43	18017	CASP3,PUM2,DHX9,PTBP1,NOLC1,MTPN,CDK4,EIF3C,RARA,PGAM1,C1QBP,EIF4EBP1,SHMT2,RBM4,UNK,EIF4H,EIF5,KHSRP,EIF1B,TNFRSF1A,EIF3D,STAT3,CAPRIN1,YBX1,KHDRBS1,PTCD3,PPP1CA,ATF4,EIF3E,EIF5A,FOXO3,IGF2BP2,RBM8A,EIF3B,POLR2G,SAMD4B,PA2G4,DDX39B,NGDN,PTK2B,HSPB1,CNOT2,NPM1
GO:BP	RNA processing	GO:0006396	2.77511e+16	3.55672e+16	963	629	66	18017	ECD,NOP2,PUM2,SUPT5H,DHX9,ADAR,PTBP1,NOLC1,DCPS,CCNT1,C14ORF166,PRMT5,THRAP3,SNRPD3,POLR2H,DDX41,C1QBP,PRPF38B,SNRPA,SMU1,RBM4,AAR2,ELP5,SRSF9,EBNA1BP2,CLK3,RBM22,USP36,SRSF6,KHSRP,DROSHA,DDX39A,SRSF1,STAT3,YBX1,KHDRBS1,RPRD2,NOP58,NAF1,NOP56,STRAP,RALY,NOL11,PRPF19,EXOSC1,SRRM2,NUP98,RBM8A,SLBP,CDK13,WDR55,SF3A1,POLR2G,CPSF6,SNRPA1,SNRPC,CCNH,PPP2CA,PA2G4,DDX39B,NGDN,REST,CLK2,TRA2A,RIOK3,U2AF2
GO:BP	antigen receptor-mediated signaling pathway	GO:0050851	2853403182215476	3.54464e+16	323	629	32	18017	EZR,INPP5D,HLA-DRB1,PSMD11,STOML2,HLA-DRA,PSMB3,PSME1,PHPT1,PSMB7,GPS2,PSMB2,PSMF1,BRAF,FOXP1,SYK,KHDRBS1,HLA-DPA1,KCNN4,PSMC5,PDPK1,PSMD7,CD81,FBXW11,LILRB4,PSMB4,RIPK2,PSMD13,PTPN6,CYLD,PSME2,PSMD2
GO:BP	amide biosynthetic process	GO:0043604	2997734951198819	3.52321e+16	924	629	64	18017	MRPL38,PUM2,DHX9,PTBP1,NOLC1,MTPN,CDK4,EIF3C,ACSL3,RARA,C1QBP,EIF4EBP1,EEF1D,CERS2,SHMT2,RBM4,TNIP1,FARSA,EIF3F,UNK,EIF4H,EIF5,KHSRP,EIF1B,MPC1,TNFRSF1A,EIF3D,STAT3,CAPRIN1,YBX1,KHDRBS1,PTCD3,RPL8,EIF3A,PPP1CA,ATF4,EIF3E,EIF5A,EIF3M,FOXO3,IGF2BP2,HSD17B12,RBM8A,EIF3B,RPS18,POLR2G,RPS5,B4GALT5,TECR,RPL3,MRPL53,EIF3L,SAMD4B,PA2G4,DDX39B,GTPBP1,NGDN,PTK2B,RPL36A,RPL24,HSPB1,CNOT2,GFM1,NPM1
GO:BP	interleukin-1-mediated signaling pathway	GO:0070498	3.06467e+16	3513616982075628	105	629	17	18017	PSMD11,PSMB3,PSME1,PSMB7,PSMB2,PSMF1,MYD88,PSMC5,PSMD7,FBXW11,PSMB4,RIPK2,PSMD13,SQSTM1,PSME2,IL1RN,PSMD2
GO:BP	hemopoiesis	GO:0030097	3.17999e+16	3.49757e+16	946	629	65	18017	CTNNB1,INPP5D,CASP3,HLA-DRB1,PSMD11,SIN3A,ADAR,GATA1,KLF13,KCNAB2,MYH9,RARA,PSMB3,PSAP,PSME1,DPF2,PRMT1,PSMB7,ALAS1,TIPARP,GPS2,PSMB2,MDK,PSMF1,KLF6,SOX12,ARNT,BRAF,DROSHA,HIPK2,FOXP1,STAT3,SYK,JUNB,PRDX3,ATF4,TYROBP,CSF3R,XBP1,PSMC5,RHOH,PSMD7,CD81,FOXO3,LILRB4,CDK13,HMGB2,GATA2,PSMB4,RIPK2,SATB1,EP300,KAT7,PML,PSMD13,PTPN6,CYLD,PREX1,PPP2R3C,PSME2,REST,PTK2B,WASF2,H3F3A,PSMD2
GO:BP	positive regulation of signal transduction	GO:0009967	3.39371e+16	3469325772523552	1706	629	100	18017	CTNNB1,HLA-DRB1,PSMD11,PUM2,VCP,PTBP1,TRAF7,CXXC5,LAMTOR1,RAF1,TFDP2,PTPN1,GPX1,ITGA5,ACTN4,GRB2,ATP6AP2,SLC20A1,ATF6,PRMT5,SHC1,PSMB3,PPIF,PSAP,BMPR2,C1QBP,PSME1,AKR1B1,EEF1D,PRMT1,HSP90AB1,YWHAH,PSMB7,HTRA2,BCL2L1,WBP2,GPS2,LRRC59,PSMB2,PSMF1,HSP90AA1,PIK3AP1,CYBA,NET1,ARNT,BRAF,ILK,CTSC,YWHAQ,MAP2K3,PHB,MYD88,HIPK2,FOXP1,GNAI2,TNFRSF1A,STAT3,SIK3,SYK,TXN,FKBP1A,FGR,PPP1CA,KCNN4,XBP1,PSMC5,SPRE…
GO:BP	process utilizing autophagic mechanism	GO:0061919	3.52388e+16	3.45298e+16	537	629	44	18017	PAFAH1B2,CASP3,ATG3,EHMT2,SUPT5H,VCP,LAMTOR1,TOMM40,QSOX1,NAMPT,VDAC1,PLEKHM1,CAPNS1,ATP6V1B2,SREBF2,PSAP,VMP1,HTRA2,CDC37,GABARAP,MAP1LC3B2,CLTC,CAPN1,HSP90AA1,USP36,CHMP4B,STAT3,XBP1,RHEB,FOXO3,UFC1,PIM2,MCL1,RIPK2,EP300,SNX5,TMEM39A,FOXO1,TOMM6,TOMM22,SQSTM1,CTSA,HSPB1,AMBRA1
GO:BP	autophagy	GO:0006914	3.52388e+16	3.45298e+16	537	629	44	18017	PAFAH1B2,CASP3,ATG3,EHMT2,SUPT5H,VCP,LAMTOR1,TOMM40,QSOX1,NAMPT,VDAC1,PLEKHM1,CAPNS1,ATP6V1B2,SREBF2,PSAP,VMP1,HTRA2,CDC37,GABARAP,MAP1LC3B2,CLTC,CAPN1,HSP90AA1,USP36,CHMP4B,STAT3,XBP1,RHEB,FOXO3,UFC1,PIM2,MCL1,RIPK2,EP300,SNX5,TMEM39A,FOXO1,TOMM6,TOMM22,SQSTM1,CTSA,HSPB1,AMBRA1
GO:BP	cell cycle phase transition	GO:0044770	3689735663368988	3433004746050238	651	629	50	18017	ECD,MEPCE,PSMD11,ORC1,SIN3A,TFDP2,CDK4,CTDSP1,DNM2,PSMB3,EIF4EBP1,PSME1,CCND2,RPA1,PRMT1,BUB3,ATP2B4,RGCC,PSMB7,PSMB2,PSMF1,HSP90AA1,DDB1,CHMP4B,MASTL,KHDRBS1,ANAPC16,CCNB2,PSMC5,MCM5,PSMD7,SSNA1,SKP2,FBXW11,PIM2,PSMB4,EP300,PLAGL1,PML,PSMD13,PTPN6,MAD2L1BP,CCNH,PSME2,CTDSP2,RPL24,CDC20,CNOT2,PSMD2,NPM1
GO:BP	regulation of transcription from RNA polymerase II promoter in response to stress	GO:0043618	3825088367203933	3.41736e+16	119	629	18	18017	PSMD11,SIN3A,ATF6,PSMB3,PSME1,PSMB7,PSMB2,PSMF1,ARNT,ATF4,PSMC5,PSMD7,PSMB4,EP300,PSMD13,HSPA5,PSME2,PSMD2
GO:BP	negative regulation of cellular catabolic process	GO:0031330	4339089018891722	3362601439979825	264	629	28	18017	EHMT2,DHX9,QSOX1,NAMPT,THRAP3,ATP2B4,HSP90AB1,HTRA2,CST3,PSMF1,BAG6,USP36,MYD88,HIPK2,CHMP4B,STAT3,YBX1,NAF1,UBE2G2,UBXN1,MCL1,TIMP2,SGTA,PML,MTMR2,TMEM39A,CTSA,ATRAID
GO:BP	secretion	GO:0046903	4401273956973723	3356421597967616	1625	629	96	18017	CHP1,PAFAH1B2,AP1M1,EZR,FCGR2A,HLA-DRB1,PSMD11,ARMC8,DHX9,VCP,LAMTOR1,RAF1,QSOX1,KCNAB2,MYH9,ACTN4,ATP6AP2,ACSL3,TRAPPC1,GLUL,PGAM1,MTX1,GSTP1,PSAP,RAB5C,SLC25A5,RNASE2,PHPT1,HSP90AB1,RGCC,PSMB7,AP1G1,SIRPA,ARHGAP17,CAPN1,CST3,CTSD,HSP90AA1,CYBA,CTSZ,BRAF,CTSC,CMTM6,BIN2,UBR4,GNAI2,TNFRSF1A,STAT3,ARL8A,SYK,GGH,GRN,STX11,FGR,C2CD2L,ANPEP,KCNN4,TYROBP,XBP1,CORO1A,ARF1,PDPK1,ITGB2,PSMD7,RAC2,DIAPH1,…
GO:BP	anaphase-promoting complex-dependent catabolic process	GO:0031145	4.47164e+16	3349533008841771	84	629	15	18017	PSMD11,PSMB3,PSME1,BUB3,PSMB7,PSMB2,PSMF1,ANAPC16,PSMC5,PSMD7,PSMB4,PSMD13,PSME2,CDC20,PSMD2
GO:BP	positive regulation of cellular protein metabolic process	GO:0032270	4998512404183823	3301159225820012	1652	629	97	18017	CHP1,CTNNB1,EZR,HLA-DRB1,DHX9,GATA1,VCP,PTBP1,TRAF7,LAMTOR1,RAF1,CDK4,DDA1,PTPN1,CCNT1,RTF1,MYH9,ITGA5,EIF3C,RAD23A,DERL1,SHC1,PSAP,BMPR2,C1QBP,PSME1,CCND2,PRMT1,ATP2B4,HSP90AB1,RGCC,HTRA2,ANKLE2,WBP2,STRADB,CTSD,TNIP1,SYAP1,HSP90AA1,BAG6,ARNT,ARRDC3,BRAF,DAZAP2,ILK,CTSC,MAP2K3,PHB,MYD88,HIPK2,GNAI2,TNFRSF1A,ZFAND2A,EIF3D,STAT3,MASTL,SYK,TXN,KHDRBS1,FKBP1A,GRN,JTB,EDEM1,ENO1,LDLR,EIF3E,EIF5A,PDPK…
GO:BP	regulation of cellular amine metabolic process	GO:0033238	5257370800839518	3279231391237345	85	629	15	18017	PSMD11,PSMB3,PSME1,ATP2B4,PSMB7,PSMB2,PSMF1,ODC1,PSMC5,ITGB2,PSMD7,PSMB4,PSMD13,PSME2,PSMD2
GO:BP	negative regulation of protein metabolic process	GO:0051248	5338720769035587	3.27256e+16	1213	629	77	18017	CHP1,CTNNB1,EZR,CASP3,HIPK3,SIN3A,ADAR,RAF1,PTPN1,GPX1,CTDSP1,GNAQ,LIMK1,OTUB1,C14ORF166,RARA,GSTP1,EIF4EBP1,GPS1,CORO1C,ATP2B4,FLOT2,HSP90AB1,SIRPA,SHMT2,RBM4,GPS2,CST3,TNIP1,PSMF1,BAG6,UNK,CTSZ,SERPINB2,ILK,KHSRP,PHB,HIPK2,GNAI2,STAT3,ARL6IP1,MASTL,CAPRIN1,YBX1,FKBP1A,EIF3A,PRDX3,LDLR,ATF4,UBE2G2,STRAP,EIF3E,PDPK1,UBXN1,SPRED2,SKI,FLNA,IGF2BP2,TIMP2,SGTA,PML,PTPN6,CYLD,FOXO1,PPP1R10,SAMD4B,PPP2…
GO:BP	regulation of hematopoietic stem cell differentiation	GO:1902036	5426755494843448	3.26546e+16	74	629	14	18017	PSMD11,GATA1,PSMB3,PSME1,PSMB7,PSMB2,PSMF1,PSMC5,PSMD7,GATA2,PSMB4,PSMD13,PSME2,PSMD2
GO:BP	negative regulation of RNA metabolic process	GO:0051253	5856229186991109	3.23238e+16	1412	629	86	18017	BAZ2A,CTNNB1,EZR,MEPCE,EHMT2,SIN3A,SUPT5H,DHX9,GATA1,PTBP1,CXXC5,HBP1,TFDP2,PFDN5,CCNT1,RTF1,ZNFX1,NFIC,DRAP1,PRMT5,SHC1,THRAP3,RARA,SREBF2,C1QBP,IKZF5,GATAD2B,DPF2,TXNIP,H1FX,GPS2,SRSF9,SRSF6,PHF12,YWHAQ,PHB,MYD88,HIPK2,FOXP1,STAT3,MYBBP1A,TXN,MBD1,YBX1,KHDRBS1,SMARCC2,JUNB,LRRFIP1,NAF1,ENO1,ATF4,PSMC5,STRAP,JUND,TLE3,SKI,FLNA,FOXO3,FBXW11,LILRB4,MEF2A,CIC,HMGB2,MORF4L2,GATA2,BHLHE40,ZEB2,SATB1,…
GO:BP	regulation of cellular component organization	GO:0051128	5922610706545334	3.22749e+16	2450	629	131	18017	CTNNB1,EZR,AP2M1,ATG3,EHMT2,SIN3A,VCP,LAMTOR1,RAF1,MTPN,TFDP2,PTPN1,GPX1,CAPZA1,RTF1,MYH9,LIMK1,ACTN4,GRB2,VDAC1,PLEKHM1,FXN,NUMB,OTUB1,CCT3,DNM2,PRMT5,NDEL1,PPIF,SREBF2,RAB5C,SLC25A5,BMPR2,EIF4EBP1,YLPM1,PHPT1,RPA1,BUB3,CORO1C,ADNP2,YWHAH,RGCC,CERS2,HTRA2,BCL2L1,CDC37,H1FX,WBP2,ARPC1B,ARHGAP17,CLTC,FSCN1,CST3,MDK,HSP90AA1,BRK1,CYBA,CTSZ,NET1,USP36,BRAF,DDB1,ILK,ANKRD13A,YWHAQ,ARPC2,PHB,ACTR3,PFN…
GO:BP	positive regulation of innate immune response	GO:0045089	6376730932809815	3195401907751849	207	629	24	18017	PSMD11,SIN3A,DHX9,RAF1,PSMB3,PSME1,PSMB7,AP1G1,PSMB2,PSMF1,SYK,PSMC5,PDPK1,PSMD7,ICAM2,FBXW11,HMGB2,PSMB4,EP300,PSMD13,UBE2K,PSME2,RIOK3,PSMD2
GO:BP	protein modification by small protein conjugation	GO:0032446	6516985891709912	3.18595e+16	965	629	65	18017	CHP1,CTNNB1,TPP2,PSMD11,NUP214,ATG3,USP22,VCP,TRAF7,DDA1,RTF1,LIMK1,OTUB1,DERL1,PSMB3,PSME1,FEM1B,HSP90AB1,PSMB7,MED6,PCNP,GPS2,PSMB2,NUP153,ZNRF1,PSMF1,HSP90AA1,ARNT,ARRDC3,DDB1,UBR4,KCTD10,MASTL,RNF130,FKBP1A,ANAPC16,RAE1,UBE2G2,PSMC5,UBE2M,UBXN1,PRPF19,PSMD7,SKP2,DCAF12,NUP98,UFC1,FBXW11,ANAPC13,PSMB4,RIPK2,PML,PSMD13,HSPA5,MTA1,RNF4,UBE2K,ARIH1,SQSTM1,PSME2,RNF216,CDC20,EGR2,U2AF2,PSMD2
GO:BP	negative regulation of cell communication	GO:0010648	6659108607262818	3.17658e+16	1505	629	90	18017	CHP1,CTNNB1,EZR,INPP5D,PSMD11,HIPK3,ADAR,GATA1,VCP,RAF1,PTPN1,GPX1,PFDN5,PTPRE,GRB2,FXN,DNM2,PSMB3,PPIF,GSTP1,SLC25A5,C1QBP,PSME1,GPS1,PHPT1,ATP2B4,RGCC,TTLL12,PSMB7,HTRA2,BCL2L1,SIRPA,GPS2,PSMB2,STRADB,MDK,TNIP1,PSMF1,ARRDC3,BRAF,MAP2K3,PHB,HIPK2,FOXP1,GNAI2,KCTD10,EIF3A,ENO1,SH3BP1,XBP1,PSMC5,STRAP,SCYL2,ARF1,TLE3,RHOH,PDPK1,SPRED2,PSMD7,SKI,CHST11,FOXO3,FBXW11,LILRB4,MCL1,HMGB2,GATA2,TIMP2,ADI…
GO:BP	regulation of hematopoietic progenitor cell differentiation	GO:1901532	7213764123611003	3141838062390393	87	629	15	18017	PSMD11,GATA1,PSMB3,PSME1,DPF2,PSMB7,PSMB2,PSMF1,PSMC5,PSMD7,GATA2,PSMB4,PSMD13,PSME2,PSMD2
GO:BP	negative regulation of signaling	GO:0023057	7268627415295162	3.13855e+16	1508	629	90	18017	CHP1,CTNNB1,EZR,INPP5D,PSMD11,HIPK3,ADAR,GATA1,VCP,RAF1,PTPN1,GPX1,PFDN5,PTPRE,GRB2,FXN,DNM2,PSMB3,PPIF,GSTP1,SLC25A5,C1QBP,PSME1,GPS1,PHPT1,ATP2B4,RGCC,TTLL12,PSMB7,HTRA2,BCL2L1,SIRPA,GPS2,PSMB2,STRADB,MDK,TNIP1,PSMF1,ARRDC3,BRAF,MAP2K3,PHB,HIPK2,FOXP1,GNAI2,KCTD10,EIF3A,ENO1,SH3BP1,XBP1,PSMC5,STRAP,SCYL2,ARF1,TLE3,RHOH,PDPK1,SPRED2,PSMD7,SKI,CHST11,FOXO3,FBXW11,LILRB4,MCL1,HMGB2,GATA2,TIMP2,ADI…
GO:BP	viral translation	GO:0019081	7338243235712836	3.13441e+16	15	629	7	18017	DHX9,PTBP1,EIF3F,EIF3D,EIF3A,EIF3B,EIF3L
GO:BP	biological regulation	GO:0065007	7672504749643908	3.11506e+16	12697	629	498	18017	BAZ2A,CHP1,PAFAH1B2,CTNNB1,EZR,FCGR2A,ECD,INPP5D,AP2M1,CASP3,HLA-DRB1,MEPCE,PSMD11,HIPK3,NOP2,ORC1,NUP214,ATG3,PUM2,EHMT2,SIN3A,SUPT5H,DHX9,PPP4C,ADAR,USP22,CHCHD2,GATA1,STOML2,VCP,KLF13,PDLIM7,PTBP1,TRAF7,CXXC5,HBP1,LAMTOR1,NOLC1,RAF1,MTPN,KPNA4,TFDP2,CDK4,DDA1,PTPN1,GPX1,CAPZA1,PFDN5,QSOX1,TPP1,NAMPT,PTPRE,KCNAB2,DCPS,CCNT1,HDLBP,PI4KB,RTF1,ZNFX1,MYH9,CTDSP1,GNAQ,LIMK1,ITGA5,NFIC,P4HB,ACTN4,GRB…
GO:BP	regulation of DNA-templated transcription in response to stress	GO:0043620	8169427077008619	3.08781e+16	125	629	18	18017	PSMD11,SIN3A,ATF6,PSMB3,PSME1,PSMB7,PSMB2,PSMF1,ARNT,ATF4,PSMC5,PSMD7,PSMB4,EP300,PSMD13,HSPA5,PSME2,PSMD2
GO:BP	regulation of phosphate metabolic process	GO:0019220	8486951934757645	3071248257411969	1877	629	106	18017	CHP1,CTNNB1,EZR,CASP3,HLA-DRB1,HIPK3,NUP214,ADAR,GATA1,STOML2,VCP,PTBP1,TRAF7,LAMTOR1,RAF1,CDK4,PTPN1,CCNT1,CTDSP1,GNAQ,ITGA5,GRB2,ATP6AP2,ACSL3,C14ORF166,PRMT5,SHC1,PGAM1,PPIF,GSTP1,PSAP,BMPR2,CCND2,GPS1,PRMT1,CORO1C,ATP2B4,HSP90AB1,RGCC,ANKLE2,CDC37,SIRPA,SHMT2,GPS2,STRADB,NUP153,TNIP1,SYAP1,HSP90AA1,ARNT,BRAF,ACTB,DAZAP2,ILK,MAP2K3,PHB,MYD88,HIPK2,GNAI2,TNFRSF1A,STAT3,MASTL,SYK,TXN,FKBP1A,JTB,…
GO:BP	regulation of phosphorus metabolic process	GO:0051174	8709600459967939	306000176715205	1878	629	106	18017	CHP1,CTNNB1,EZR,CASP3,HLA-DRB1,HIPK3,NUP214,ADAR,GATA1,STOML2,VCP,PTBP1,TRAF7,LAMTOR1,RAF1,CDK4,PTPN1,CCNT1,CTDSP1,GNAQ,ITGA5,GRB2,ATP6AP2,ACSL3,C14ORF166,PRMT5,SHC1,PGAM1,PPIF,GSTP1,PSAP,BMPR2,CCND2,GPS1,PRMT1,CORO1C,ATP2B4,HSP90AB1,RGCC,ANKLE2,CDC37,SIRPA,SHMT2,GPS2,STRADB,NUP153,TNIP1,SYAP1,HSP90AA1,ARNT,BRAF,ACTB,DAZAP2,ILK,MAP2K3,PHB,MYD88,HIPK2,GNAI2,TNFRSF1A,STAT3,MASTL,SYK,TXN,FKBP1A,JTB,…
GO:BP	negative regulation of programmed cell death	GO:0043069	9006145296672306	3.04546e+16	953	629	64	18017	CTNNB1,CASP3,HIPK3,SIN3A,ADAR,GATA1,RAF1,PTPN1,GPX1,DCPS,ITGA5,FXN,SHC1,RARA,PPIF,GSTP1,SLC25A5,AKR1B1,CCND2,HSP90AB1,HTRA2,ANKLE2,BCL2L1,STRADB,MDK,BAG6,SERPINB2,BRAF,SRSF6,DDB1,ILK,PHB,MYD88,HIPK2,FOXP1,GNAI2,ARL6IP1,GRN,PRDX3,ENO1,XBP1,PSMC5,CORO1A,PDPK1,SLC40A1,CHST11,FLNA,PIM2,MCL1,HMGB2,GATA2,ARF4,UCP2,RIPK2,HSPA5,FOXO1,HSPD1,PPP1R10,SQSTM1,PA2G4,PTK2B,HSPB1,AMBRA1,NPM1
GO:BP	regulation of cellular protein localization	GO:1903827	9765674556708044	3.0103e+16	557	629	44	18017	CHP1,CTNNB1,EZR,AP2M1,MEPCE,SIN3A,NOLC1,TFDP2,PTPN1,KCNAB2,ACSL3,NUMB,CCT3,GLUL,NDEL1,SREBF2,ATP2B4,HSP90AB1,YWHAH,HTRA2,BCL2L1,CLTC,HSP90AA1,RBM22,USP36,ACTB,ANKRD13A,YWHAQ,TXN,EDEM1,TYROBP,UBE2G2,PDPK1,ITGB2,RAC2,CD81,FLNA,LILRB4,CCDC88A,KAT7,CYLD,MCRS1,SQSTM1,ZDHHC5
GO:BP	negative regulation of mitotic cell cycle	GO:0045930	9772914661276644	3009975893545111	341	629	32	18017	CTNNB1,PSMD11,ORC1,TFDP2,CDK4,CTDSP1,PSMB3,PSME1,PRMT1,BUB3,RGCC,PSMB7,BCL2L1,PSMB2,PSMF1,PSMC5,PSMD7,TIMP2,PSMB4,EP300,PLAGL1,PML,PSMD13,MAD2L1BP,PPP1R10,PSME2,CTDSP2,RPL24,CDC20,CNOT2,PSMD2,TOP2B
GO:BP	activation of innate immune response	GO:0002218	9964561122861562	3.00154e+16	140	629	19	18017	PSMD11,SIN3A,RAF1,PSMB3,PSME1,PSMB7,PSMB2,PSMF1,SYK,PSMC5,PDPK1,PSMD7,ICAM2,FBXW11,PSMB4,EP300,PSMD13,PSME2,PSMD2
GO:BP	response to biotic stimulus	GO:0009607	1.06715e+16	2971773216415514	1634	629	95	18017	CASP3,HLA-DRB1,PSMD11,PUM2,SIN3A,DHX9,ADAR,SMC1A,RAF1,CDK4,PTPN1,GPX1,CAPZA1,SEC61A1,IFITM2,SHC1,RARA,HLA-DRA,PSMB3,GSTP1,RNASE2,DDX41,C1QBP,PSME1,HSP90AB1,TXNIP,TTLL12,PSMB7,AP1G1,BCL2L1,CDC37,SIRPA,SHMT2,IRF9,JAK1,PSMB2,PSMF1,CYBA,DROSHA,PHB,ACTR3,MYD88,FOXP1,TNFRSF1A,SYK,ODC1,GRN,JUNB,FGR,IFNAR2,HLA-DPA1,PRDX3,ENO1,TYROBP,XBP1,PSMC5,CORO1A,JUND,ARF1,PDPK1,PSMD7,ZC3HAV1,ICAM2,SKP2,FLNA,IFITM1,F…
GO:BP	regulation of transcription from RNA polymerase II promoter in response to hypoxia	GO:0061418	1.0712e+16	2.97013e+16	78	629	14	18017	PSMD11,PSMB3,PSME1,PSMB7,PSMB2,PSMF1,ARNT,PSMC5,PSMD7,PSMB4,EP300,PSMD13,PSME2,PSMD2
GO:BP	negative regulation of cellular protein metabolic process	GO:0032269	1.1775e+16	2.92904e+16	1151	629	73	18017	CHP1,CTNNB1,EZR,CASP3,HIPK3,SIN3A,ADAR,RAF1,PTPN1,GPX1,CTDSP1,GNAQ,LIMK1,OTUB1,C14ORF166,RARA,GSTP1,EIF4EBP1,GPS1,CORO1C,ATP2B4,HSP90AB1,SIRPA,SHMT2,RBM4,GPS2,CST3,TNIP1,PSMF1,BAG6,UNK,CTSZ,SERPINB2,ILK,KHSRP,PHB,HIPK2,GNAI2,STAT3,ARL6IP1,MASTL,CAPRIN1,YBX1,FKBP1A,EIF3A,PRDX3,ATF4,UBE2G2,STRAP,EIF3E,PDPK1,UBXN1,SPRED2,SKI,IGF2BP2,TIMP2,SGTA,PML,PTPN6,CYLD,FOXO1,PPP1R10,SAMD4B,PPP2CA,SQSTM1,PPP1R1…
GO:BP	cellular response to hypoxia	GO:0071456	1181076993577534	2.92772e+16	214	629	24	18017	PSMD11,CHCHD2,P4HB,PSMB3,EIF4EBP1,PSME1,RGCC,PSMB7,PSMB2,GNB1,PSMF1,ARNT,HIPK2,ENO1,NDRG1,PSMC5,PGK1,PSMD7,FOXO3,PSMB4,EP300,PSMD13,PSME2,PSMD2
GO:BP	regulation of mRNA processing	GO:0050684	1.26398e+16	2898259049903248	156	629	20	18017	SUPT5H,DHX9,PTBP1,CCNT1,THRAP3,C1QBP,SNRPA,SMU1,RBM4,SRSF9,SRSF6,SRSF1,KHDRBS1,PRPF19,NUP98,RBM8A,CPSF6,REST,TRA2A,U2AF2
GO:BP	regulation of cellular protein catabolic process	GO:1903362	1.27653e+16	2893968298346845	262	629	27	18017	EZR,VCP,DDA1,GPX1,RAD23A,PSME1,HSP90AB1,PSMF1,HSP90AA1,BAG6,CTSC,HIPK2,ZFAND2A,EDEM1,LDLR,UBE2G2,UBXN1,CD81,CSNK1A1,SGTA,PML,UBE2K,ARIH1,PSME2,PTK2B,ATRAID,CDC20
GO:BP	interaction with host	GO:0051701	1.28671e+16	2890520707302594	215	629	24	18017	CTNNB1,HLA-DRB1,KPNA4,ITGA5,P4HB,GRB2,IFITM2,BCL2L1,NUP153,TNIP1,DDB1,PHB,HIPK2,CHMP4B,ANPEP,LDLR,CD81,IFITM1,IFITM3,VAPA,KPNA1,PML,IST1,DDX39B
GO:BP	negative regulation of signal transduction	GO:0009968	1.29124e+16	2888994098112073	1372	629	83	18017	CHP1,CTNNB1,EZR,INPP5D,PSMD11,HIPK3,ADAR,GATA1,VCP,RAF1,PTPN1,GPX1,PFDN5,PTPRE,GRB2,FXN,DNM2,PSMB3,PPIF,GSTP1,SLC25A5,C1QBP,PSME1,GPS1,PHPT1,ATP2B4,TTLL12,PSMB7,HTRA2,BCL2L1,SIRPA,GPS2,PSMB2,STRADB,MDK,TNIP1,PSMF1,ARRDC3,MAP2K3,PHB,HIPK2,FOXP1,GNAI2,KCTD10,EIF3A,ENO1,SH3BP1,XBP1,PSMC5,STRAP,SCYL2,TLE3,RHOH,PDPK1,SPRED2,PSMD7,SKI,CHST11,FOXO3,FBXW11,LILRB4,MCL1,HMGB2,GATA2,TIMP2,ADIPOR1,CSNK1A1,PS…
GO:BP	intracellular signal transduction	GO:0035556	1436848836660156	2.84259e+16	2854	629	146	18017	CHP1,CTNNB1,EZR,INPP5D,CASP3,HLA-DRB1,PSMD11,HIPK3,NOP2,PUM2,EHMT2,PPP4C,PTBP1,TRAF7,CXXC5,LAMTOR1,RAF1,TFDP2,PTPN1,GPX1,PI4KB,GNAQ,LIMK1,P4HB,ACTN4,GRB2,PLEKHM1,ATP6AP2,SLC20A1,ARHGAP1,DNM2,PRMT5,SHC1,PSMB3,PPIF,GSTP1,PSAP,C1QBP,EIF4EBP1,PSME1,AKR1B1,EEF1D,GPS1,RPA1,PRMT1,ATP2B4,HSP90AB1,RGCC,PSMB7,HTRA2,RAB35,BCL2L1,SIRPA,JAK1,ARHGAP17,GPS2,LRRC59,PSMB2,GNB1,TNIP1,SYAP1,PSMF1,HSP90AA1,BAG6,PIK3…
GO:BP	antigen processing and presentation of exogenous peptide antigen via MHC class I	GO:0042590	1479779268801098	2.8298e+16	80	629	14	18017	PSMD11,PSMB3,PSME1,PSMB7,PSMB2,PSMF1,CYBA,PSMC5,PSMD7,IFI30,PSMB4,PSMD13,PSME2,PSMD2
GO:BP	positive regulation of transcription by RNA polymerase II	GO:0045944	1.50042e+16	2823787217223158	1267	629	78	18017	CTNNB1,ECD,MEPCE,SIN3A,SUPT5H,DHX9,CHCHD2,GATA1,KLF13,RAF1,TFDP2,NAMPT,CCNT1,NFIC,MYBL2,ATF6,C14ORF166,THRAP3,RARA,PPRC1,SREBF2,BMPR2,DDX41,IKZF5,DPF2,RGCC,MED6,WBP2,GPS2,PBX2,TNIP1,KLF6,SOX12,IER5,ARNT,KHSRP,ACTR3,HIPK2,PFN1,ARID4B,TNFRSF1A,STAT3,YBX1,JUNB,ATF4,XBP1,PSMC5,JUND,PRDM10,CAMTA2,SLC40A1,SKI,CD81,FOXO3,MAML1,MEF2A,CDK13,HMGB2,MORF4L2,GATA2,LPCAT3,ARF4,ZEB2,RIPK2,SSBP2,EP300,PLAGL1,KAT…
GO:BP	positive regulation of cell differentiation	GO:0045597	1.53026e+16	2.81523e+16	1052	629	68	18017	CTNNB1,INPP5D,HLA-DRB1,SIN3A,GATA1,PDLIM7,LIMK1,P4HB,NUMB,DNM2,PRMT5,RARA,NDEL1,BMPR2,C1QBP,PRMT1,HSP90AB1,RGCC,RBM4,MDK,SYAP1,SOX12,ARNT,BRAF,ILK,ARPC2,STAT3,SYK,CAPRIN1,GRN,JUNB,TYROBP,XBP1,JUND,ARF1,RHOH,PRPF19,RHEB,FLNA,FOXO3,IFITM1,LILRB4,MAML1,MEF2A,HMGB2,MORF4L2,GATA2,TIMP2,ZEB2,RIPK2,EP300,KAT7,CYLD,HSPA5,TRIOBP,TNFRSF1B,IST1,PREX1,PA2G4,DDX39B,PPP2R3C,REST,PTK2B,ATRAID,CUX1,EGR2,ADM,EHD1
GO:BP	regulation of response to external stimulus	GO:0032101	1.60293e+16	2.79509e+16	1096	629	70	18017	HLA-DRB1,PSMD11,PUM2,SIN3A,DHX9,ADAR,RAF1,PTPN1,GPX1,PSMB3,NDEL1,GSTP1,BMPR2,C1QBP,PSME1,HSP90AB1,TTLL12,PSMB7,CERS2,AP1G1,CDC37,SIRPA,JAK1,GPS2,PSMB2,MDK,TNIP1,PSMF1,PIK3AP1,CYBA,SERPINB2,BRAF,CTSC,DROSHA,MYD88,FOXP1,TNFRSF1A,STAT3,SPATA2,SYK,GRN,FGR,IFNAR2,LDLR,PSMC5,PDPK1,PSMD7,ICAM2,RAC2,CD81,FBXW11,HMGB2,LPCAT3,PSMB4,RIPK2,EP300,PSMD13,PTPN6,CYLD,TNFRSF1B,UBE2K,HSPD1,IL17RA,PPP2R3C,PSME2,RNF…
GO:BP	regulation of protein modification process	GO:0031399	1.67702e+16	2775461747677724	1927	629	107	18017	CHP1,CTNNB1,EZR,CASP3,HLA-DRB1,HIPK3,EHMT2,SIN3A,ADAR,GATA1,VCP,PTBP1,TRAF7,LAMTOR1,RAF1,CDK4,PTPN1,CCNT1,RTF1,CTDSP1,GNAQ,LIMK1,ITGA5,GRB2,ATP6AP2,OTUB1,DERL1,C14ORF166,PRMT5,SHC1,GSTP1,PSAP,BMPR2,CCND2,GPS1,FEM1B,PRMT1,CORO1C,ATP2B4,HSP90AB1,RGCC,ANKLE2,CDC37,SIRPA,WBP2,GPS2,STRADB,TNIP1,SYAP1,HSP90AA1,ARNT,ARRDC3,BRAF,ACTB,DAZAP2,ILK,MAP2K3,PHB,MYD88,HIPK2,GNAI2,TNFRSF1A,STAT3,MASTL,SYK,TXN,FK…
GO:BP	nuclear export	GO:0051168	1.70143e+16	2.76919e+16	203	629	23	18017	CHP1,NUP214,DHX9,SRSF9,STRADB,NUP153,RBM22,SRSF6,DDX39A,SRSF1,TXN,KHDRBS1,RAE1,EIF5A,NUP98,RBM8A,SLBP,CPSF6,XPOT,DDX39B,EGR2,U2AF2,NPM1
GO:BP	regulation of phosphorylation	GO:0042325	1.7498e+16	2.75701e+16	1675	629	96	18017	CHP1,CTNNB1,EZR,CASP3,HLA-DRB1,HIPK3,NUP214,ADAR,GATA1,VCP,TRAF7,LAMTOR1,RAF1,CDK4,PTPN1,CCNT1,CTDSP1,GNAQ,ITGA5,GRB2,ATP6AP2,C14ORF166,PRMT5,SHC1,PGAM1,PPIF,GSTP1,PSAP,BMPR2,CCND2,GPS1,PRMT1,CORO1C,ATP2B4,HSP90AB1,RGCC,ANKLE2,CDC37,SIRPA,SHMT2,GPS2,STRADB,NUP153,TNIP1,SYAP1,HSP90AA1,ARNT,BRAF,ACTB,DAZAP2,ILK,MAP2K3,PHB,MYD88,HIPK2,GNAI2,TNFRSF1A,STAT3,SYK,TXN,JTB,FGR,EIF3A,PRDX3,CCNB2,RAE1,STRAP…
GO:BP	negative regulation of apoptotic process	GO:0043066	1777656006510441	2.75015e+16	930	629	62	18017	CTNNB1,CASP3,HIPK3,SIN3A,ADAR,GATA1,RAF1,PTPN1,GPX1,ITGA5,FXN,SHC1,RARA,PPIF,GSTP1,SLC25A5,AKR1B1,CCND2,HSP90AB1,HTRA2,ANKLE2,BCL2L1,STRADB,MDK,BAG6,SERPINB2,BRAF,SRSF6,DDB1,ILK,PHB,MYD88,HIPK2,FOXP1,GNAI2,ARL6IP1,GRN,PRDX3,ENO1,XBP1,CORO1A,PDPK1,SLC40A1,CHST11,FLNA,PIM2,MCL1,HMGB2,GATA2,ARF4,UCP2,RIPK2,HSPA5,FOXO1,HSPD1,PPP1R10,SQSTM1,PA2G4,PTK2B,HSPB1,AMBRA1,NPM1
GO:BP	positive regulation of viral process	GO:0048524	1911753863530814	2.71857e+16	106	629	16	18017	HLA-DRB1,SUPT5H,DHX9,ADAR,CCNT1,P4HB,RAD23A,POLR2H,DDB1,PFN1,CHMP4B,VAPA,POLR2G,EP300,TMEM39A,TOP2B
GO:BP	cell differentiation	GO:0030154	1.91696e+16	2.71739e+16	4388	629	206	18017	AP1M1,CTNNB1,EZR,INPP5D,CASP3,HLA-DRB1,PSMD11,EHMT2,SIN3A,SEPT6,DHX9,ADAR,GATA1,KLF13,PDLIM7,PTBP1,PRRC2A,NOLC1,RAF1,MTPN,GPX1,TPP1,KCNAB2,RTF1,MYH9,CTDSP1,LIMK1,ITGA5,P4HB,ACTN4,GRB2,VDAC1,BSG,ACSL3,NUMB,CAPNS1,DNM2,PRMT5,SHC1,RARA,PSMB3,NDEL1,GSTP1,PSAP,BMPR2,DDX41,C1QBP,PSME1,AKR1B1,FEM1B,DPF2,PRMT1,CORO1C,ADNP2,FLOT2,HSP90AB1,TXNIP,YWHAH,RGCC,PSMB7,CERS2,HTRA2,AP1G1,RAB35,BCL2L1,ALAS1,RBM4,TI…
GO:BP	regulation of stem cell differentiation	GO:2000736	1935789648650254	271314183679713	119	629	17	18017	PSMD11,GATA1,PSMB3,PSME1,PSMB7,PSMB2,PSMF1,STAT3,PSMC5,PSMD7,CDK13,GATA2,PSMB4,PSMD13,PSME2,REST,PSMD2
GO:BP	regulation of viral process	GO:0050792	1.95773e+16	2.70825e+16	220	629	24	18017	HLA-DRB1,SUPT5H,DHX9,ADAR,CCNT1,P4HB,RAD23A,IFITM2,POLR2H,TNIP1,DDB1,PHB,PFN1,CHMP4B,ZC3HAV1,IFITM1,IFITM3,VAPA,POLR2G,EP300,PML,TMEM39A,REST,TOP2B
GO:BP	cellular developmental process	GO:0048869	1.97996e+16	2703343545778152	4468	629	209	18017	AP1M1,CTNNB1,EZR,INPP5D,CASP3,HLA-DRB1,PSMD11,EHMT2,SIN3A,SEPT6,DHX9,ADAR,GATA1,KLF13,PDLIM7,PTBP1,PRRC2A,NOLC1,RAF1,MTPN,GPX1,TPP1,NAMPT,KCNAB2,RTF1,MYH9,CTDSP1,LIMK1,ITGA5,P4HB,ACTN4,GRB2,VDAC1,BSG,ACSL3,NUMB,CAPNS1,DNM2,PRMT5,SHC1,RARA,PSMB3,NDEL1,GSTP1,PSAP,BMPR2,DDX41,C1QBP,PSME1,AKR1B1,FEM1B,DPF2,PRMT1,CORO1C,ADNP2,FLOT2,HSP90AB1,TXNIP,YWHAH,RGCC,PSMB7,CERS2,HTRA2,AP1G1,RAB35,BCL2L1,ALAS1,R…
GO:BP	RNA localization	GO:0006403	2543908296645688	2594498548282497	239	629	25	18017	NUP214,DHX9,CCT3,C14ORF166,SRSF9,NUP153,SRSF6,KHSRP,DDX39A,SRSF1,YBX1,KHDRBS1,NOP58,NAF1,RAE1,EIF5A,NUP98,IGF2BP2,RBM8A,SLBP,CPSF6,XPOT,DDX39B,U2AF2,NPM1
GO:BP	antigen processing and presentation of exogenous peptide antigen via MHC class II	GO:0019886	2.68181e+16	2571571256659579	96	629	15	18017	AP1M1,AP2M1,HLA-DRB1,CAPZA1,AP1B1,DNM2,HLA-DRA,AP1G1,CLTC,CTSD,HLA-DPA1,ARF1,HLA-DMA,IFI30,DCTN5
GO:BP	response to other organism	GO:0051707	2695308716535451	2.56939e+16	1600	629	92	18017	CASP3,HLA-DRB1,PSMD11,PUM2,SIN3A,DHX9,ADAR,RAF1,CDK4,PTPN1,GPX1,CAPZA1,SEC61A1,IFITM2,SHC1,RARA,HLA-DRA,PSMB3,GSTP1,RNASE2,DDX41,C1QBP,PSME1,HSP90AB1,TTLL12,PSMB7,AP1G1,BCL2L1,CDC37,SIRPA,SHMT2,IRF9,JAK1,PSMB2,PSMF1,CYBA,DROSHA,PHB,ACTR3,MYD88,FOXP1,TNFRSF1A,SYK,ODC1,GRN,JUNB,FGR,IFNAR2,HLA-DPA1,PRDX3,ENO1,TYROBP,XBP1,PSMC5,CORO1A,JUND,ARF1,PDPK1,PSMD7,ZC3HAV1,ICAM2,SKP2,FLNA,IFITM1,FBXW11,PIM2,I…
GO:BP	negative regulation of cell cycle	GO:0045786	2.74806e+16	2.56097e+16	637	629	47	18017	CTNNB1,CASP3,PSMD11,ORC1,EHMT2,HBP1,LAMTOR1,TFDP2,CDK4,CTDSP1,PSMB3,PSME1,FEM1B,PRMT1,BUB3,HSP90AB1,RGCC,PSMB7,HTRA2,BCL2L1,PSMB2,STRADB,PSMF1,ILK,MYBBP1A,PSMC5,PRPF19,PSMD7,RHEB,TIMP2,PSMB4,EP300,PLAGL1,PML,PSMD13,RHOB,MAD2L1BP,PPP1R10,DDX39B,PSME2,CTDSP2,RPL24,CDC20,CNOT2,PSMD2,TOP2B,NPM1
GO:BP	response to external biotic stimulus	GO:0043207	2.84334e+16	2.54617e+16	1602	629	92	18017	CASP3,HLA-DRB1,PSMD11,PUM2,SIN3A,DHX9,ADAR,RAF1,CDK4,PTPN1,GPX1,CAPZA1,SEC61A1,IFITM2,SHC1,RARA,HLA-DRA,PSMB3,GSTP1,RNASE2,DDX41,C1QBP,PSME1,HSP90AB1,TTLL12,PSMB7,AP1G1,BCL2L1,CDC37,SIRPA,SHMT2,IRF9,JAK1,PSMB2,PSMF1,CYBA,DROSHA,PHB,ACTR3,MYD88,FOXP1,TNFRSF1A,SYK,ODC1,GRN,JUNB,FGR,IFNAR2,HLA-DPA1,PRDX3,ENO1,TYROBP,XBP1,PSMC5,CORO1A,JUND,ARF1,PDPK1,PSMD7,ZC3HAV1,ICAM2,SKP2,FLNA,IFITM1,FBXW11,PIM2,I…
GO:BP	protein phosphorylation	GO:0006468	2.94927e+16	2.53029e+16	2044	629	111	18017	CHP1,CTNNB1,EZR,CASP3,HLA-DRB1,PSMD11,HIPK3,ADAR,GATA1,TRAF7,LAMTOR1,RAF1,CDK4,PTPN1,CCNT1,CTDSP1,GNAQ,LIMK1,ITGA5,GRB2,ATP6AP2,C14ORF166,PRMT5,SHC1,RARA,PSMB3,GSTP1,PSAP,BMPR2,PSME1,CCND2,GPS1,PRMT1,CORO1C,ATP2B4,HSP90AB1,RGCC,PSMB7,CDC37,SIRPA,BCKDK,JAK1,GPS2,PSMB2,STRADB,TNIP1,SYAP1,PSMF1,HSP90AA1,CLK3,BRAF,ACTB,DAZAP2,ILK,MAP2K3,PHB,MYD88,HIPK2,GNAI2,TNFRSF1A,STAT3,MASTL,SIK3,SYK,TXN,JTB,FGR,…
GO:BP	negative regulation of catabolic process	GO:0009895	297382834824867	2526684102915557	324	629	30	18017	EHMT2,DHX9,QSOX1,NAMPT,THRAP3,ATP2B4,HSP90AB1,HTRA2,CST3,PSMF1,BAG6,USP36,PHB,MYD88,HIPK2,CHMP4B,STAT3,YBX1,NAF1,UBE2G2,UBXN1,FLNA,MCL1,TIMP2,SGTA,PML,MTMR2,TMEM39A,CTSA,ATRAID
GO:BP	negative regulation of nucleobase-containing compound metabolic process	GO:0045934	3.06354e+16	2513775758937274	1514	629	88	18017	BAZ2A,CTNNB1,EZR,MEPCE,EHMT2,SIN3A,SUPT5H,DHX9,GATA1,PTBP1,CXXC5,HBP1,TFDP2,PFDN5,CCNT1,RTF1,ZNFX1,NFIC,DRAP1,OTUB1,PRMT5,SHC1,THRAP3,RARA,SREBF2,BMPR2,C1QBP,IKZF5,GATAD2B,DPF2,TXNIP,H1FX,GPS2,SRSF9,SRSF6,PHF12,YWHAQ,PHB,MYD88,HIPK2,FOXP1,STAT3,MYBBP1A,TXN,MBD1,YBX1,KHDRBS1,SMARCC2,JUNB,LRRFIP1,NAF1,ENO1,ATF4,PSMC5,STRAP,JUND,TLE3,SKI,FLNA,FOXO3,FBXW11,LILRB4,MEF2A,CIC,HMGB2,MORF4L2,GATA2,BHLHE40…
GO:BP	macroautophagy	GO:0016236	3184721267751307	2.49693e+16	308	629	29	18017	PAFAH1B2,CASP3,ATG3,EHMT2,SUPT5H,VCP,LAMTOR1,TOMM40,QSOX1,VDAC1,CAPNS1,ATP6V1B2,VMP1,HTRA2,CDC37,GABARAP,MAP1LC3B2,CAPN1,USP36,CHMP4B,RHEB,UFC1,RIPK2,SNX5,TMEM39A,TOMM6,TOMM22,SQSTM1,AMBRA1
GO:BP	hematopoietic progenitor cell differentiation	GO:0002244	3.49726e+16	2.45627e+16	181	629	21	18017	PSMD11,SIN3A,ADAR,GATA1,KCNAB2,PSMB3,PSME1,DPF2,PSMB7,PSMB2,PSMF1,BRAF,PSMC5,PSMD7,GATA2,PSMB4,PSMD13,PTPN6,PSME2,REST,PSMD2
GO:BP	cellular process	GO:0009987	3.77368e+16	2423235473109197	17079	629	619	18017	BAZ2A,CHP1,PAFAH1B2,AP1M1,CTNNB1,EZR,FCGR2A,TPP2,ECD,INPP5D,AP2M1,CASP3,HLA-DRB1,MEPCE,PSMD11,HIPK3,NOP2,ORC1,NUP214,ATG3,MRPL38,PUM2,EHMT2,SIN3A,SEPT6,SUPT5H,ARMC8,DHX9,PPP4C,ADAR,COPE,USP22,CHCHD2,GATA1,STOML2,VCP,KLF13,PDLIM7,PTBP1,PRRC2A,SMC1A,TRAF7,CXXC5,HBP1,LAMTOR1,TOMM40,NOLC1,RAF1,MTPN,KPNA4,TFDP2,CDK4,DDA1,PTPN1,GPX1,CAPZA1,PFDN5,QSOX1,TPP1,NAMPT,PTPRE,KCNAB2,DCPS,AP1B1,CCNT1,PI4KB,RTF1…
GO:BP	response to type I interferon	GO:0034340	4007743676984574	2.3971e+16	99	629	15	18017	ADAR,PTPN1,IFITM2,HSP90AB1,TTLL12,CDC37,SHMT2,IRF9,JAK1,MYD88,IFNAR2,IFITM1,IFITM3,PTPN6,UBE2K
GO:BP	positive regulation of erythrocyte differentiation	GO:0045648	4154864090647364	2.38144e+16	34	629	9	18017	INPP5D,GATA1,PRMT1,ARNT,STAT3,FOXO3,HMGB2,GATA2,KAT7
GO:BP	antigen processing and presentation of exogenous peptide antigen via MHC class I, TAP-dependent	GO:0002479	4165069322125431	2.38038e+16	75	629	13	18017	PSMD11,PSMB3,PSME1,PSMB7,PSMB2,PSMF1,CYBA,PSMC5,PSMD7,PSMB4,PSMD13,PSME2,PSMD2
GO:BP	hematopoietic stem cell differentiation	GO:0060218	4237834224796616	2372856035983931	87	629	14	18017	PSMD11,GATA1,PSMB3,PSME1,PSMB7,PSMB2,PSMF1,PSMC5,PSMD7,GATA2,PSMB4,PSMD13,PSME2,PSMD2
GO:BP	regulation of molecular function	GO:0065009	4456886003297623	2.35097e+16	3084	629	153	18017	CHP1,CTNNB1,CASP3,HLA-DRB1,MEPCE,HIPK3,SIN3A,DHX9,ADAR,GATA1,VCP,TRAF7,RAF1,MTPN,CDK4,PTPN1,GPX1,CCNT1,GNAQ,LIMK1,ACTN4,ARHGAP1,EIF3C,FXN,DNM2,DERL1,C14ORF166,SHC1,RARA,GAPVD1,NDEL1,PPIF,PPRC1,GSTP1,PCBD1,PSAP,PSME1,CCND2,GPS1,FEM1B,PHPT1,CORO1C,ATP2B4,FLOT2,HSP90AB1,TXNIP,YWHAH,RGCC,HTRA2,ANKLE2,CDC37,SIRPA,BCKDK,LY6E,TBC1D9B,ARHGAP17,GPS2,STRADB,CAPN1,CST3,CTSD,SYAP1,PSMF1,HSP90AA1,CYBA,CTSZ,GN…
GO:BP	antigen processing and presentation of peptide antigen via MHC class II	GO:0002495	4565493654500953	2.34051e+16	100	629	15	18017	AP1M1,AP2M1,HLA-DRB1,CAPZA1,AP1B1,DNM2,HLA-DRA,AP1G1,CLTC,CTSD,HLA-DPA1,ARF1,HLA-DMA,IFI30,DCTN5
GO:BP	regulation of substrate adhesion-dependent cell spreading	GO:1900024	5000404226101231	2300994886450127	54	629	11	18017	P4HB,ACTN4,DNM2,C1QBP,CORO1C,MDK,BRAF,ARPC2,FLNA,TRIOBP,PREX1
GO:BP	regulation of autophagy	GO:0010506	5076621864807402	2.29443e+16	350	629	31	18017	PAFAH1B2,CASP3,EHMT2,SUPT5H,LAMTOR1,QSOX1,NAMPT,VDAC1,CAPNS1,ATP6V1B2,SREBF2,PSAP,HTRA2,CDC37,CAPN1,USP36,CHMP4B,STAT3,XBP1,RHEB,FOXO3,PIM2,MCL1,RIPK2,EP300,SNX5,TMEM39A,FOXO1,CTSA,HSPB1,AMBRA1
GO:BP	RNA transport	GO:0050658	5289823532910555	2.27656e+16	201	629	22	18017	NUP214,DHX9,C14ORF166,SRSF9,NUP153,SRSF6,KHSRP,DDX39A,SRSF1,YBX1,KHDRBS1,RAE1,EIF5A,NUP98,IGF2BP2,RBM8A,SLBP,CPSF6,XPOT,DDX39B,U2AF2,NPM1
GO:BP	nucleic acid transport	GO:0050657	5289823532910555	2.27656e+16	201	629	22	18017	NUP214,DHX9,C14ORF166,SRSF9,NUP153,SRSF6,KHSRP,DDX39A,SRSF1,YBX1,KHDRBS1,RAE1,EIF5A,NUP98,IGF2BP2,RBM8A,SLBP,CPSF6,XPOT,DDX39B,U2AF2,NPM1
GO:BP	phagocytosis	GO:0006909	5507773010040884	2259023966475761	387	629	33	18017	FCGR2A,ATG3,MYH9,LIMK1,GRB2,DNM2,RARA,C1ORF43,CORO1C,HSP90AB1,SIRPA,ARPC1B,HSP90AA1,BRK1,CYBA,ACTB,BIN2,ARPC2,ACTR3,MYD88,SYK,FGR,SH3BP1,LDLR,TYROBP,CORO1A,RHOH,ITGB2,RAC2,GATA2,IL2RG,CDC42SE1,WASF2
GO:BP	protein localization to nucleus	GO:0034504	5722437964053571	2.24242e+16	283	629	27	18017	CHP1,MEPCE,NUP214,SIN3A,NOLC1,KPNA4,CCT3,GLUL,HSP90AB1,TXNIP,SUPT7L,NUP153,TNPO3,RBM22,STAT3,SYK,TXN,FLNA,NUP98,LILRB4,CTDNEP1,KPNA1,KAT7,PML,FAM53C,MCRS1,PPP1R10
GO:BP	neuron death	GO:0070997	6145924418284331	2211412784939368	371	629	32	18017	CHP1,CTNNB1,CASP3,NAMPT,MYBL2,SIGMAR1,HSP90AB1,HTRA2,BCL2L1,MDK,CTSZ,BRAF,ILK,HIPK2,CHMP4B,STAT3,GRN,ATF4,TYROBP,UBE2M,CORO1A,PDPK1,ITGB2,FOXO3,MCL1,HSPA5,TNFRSF1B,HSPD1,NCSTN,REST,PTK2B,AMBRA1
GO:BP	negative regulation of mitotic cell cycle phase transition	GO:1901991	623538359383029	2205136824052418	251	629	25	18017	PSMD11,ORC1,TFDP2,CDK4,CTDSP1,PSMB3,PSME1,PRMT1,BUB3,RGCC,PSMB7,PSMB2,PSMF1,PSMC5,PSMD7,PSMB4,EP300,PLAGL1,PML,PSMD13,PSME2,CTDSP2,CDC20,CNOT2,PSMD2
GO:BP	protein import	GO:0017038	6237427322080642	2.20499e+16	203	629	22	18017	CHP1,NUP214,TOMM40,NOLC1,KPNA4,TIMM23,HSP90AB1,TXNIP,NUP153,HSP90AA1,TNPO3,RBM22,STAT3,SYK,FLNA,NUP98,KPNA1,PML,FAM53C,TOMM22,HSPD1,PPP1R10
GO:BP	regulation of symbiotic process	GO:0043903	6363085729809248	2.19633e+16	235	629	24	18017	HLA-DRB1,SUPT5H,DHX9,ADAR,CCNT1,P4HB,RAD23A,IFITM2,POLR2H,TNIP1,DDB1,PHB,PFN1,CHMP4B,ZC3HAV1,IFITM1,IFITM3,VAPA,POLR2G,EP300,PML,TMEM39A,REST,TOP2B
GO:BP	NIK/NF-kappaB signaling	GO:0038061	6471579987985409	2.18899e+16	188	629	21	18017	PSMD11,PPP4C,ACTN4,PSMB3,PSME1,PSMB7,PSMB2,PSMF1,ILK,PHB,PSMC5,PSMD7,FBXW11,ADIPOR1,PSMB4,EP300,PSMD13,CYLD,NFKB2,PSME2,PSMD2
GO:BP	regulation of protein localization	GO:0032880	6511737078118904	2186303143104622	1010	629	64	18017	CHP1,CTNNB1,EZR,AP2M1,HLA-DRB1,MEPCE,SIN3A,DHX9,NOLC1,TFDP2,PTPN1,KCNAB2,ACSL3,NUMB,CCT3,GLUL,GAPVD1,ZDHHC3,NDEL1,SREBF2,SLC25A5,PHPT1,ATP2B4,HSP90AB1,YWHAH,RGCC,HTRA2,BCL2L1,CLTC,CTSD,HSP90AA1,RBM22,USP36,ACTB,ANKRD13A,YWHAQ,STAT3,SYK,TXN,FKBP1A,FGR,EDEM1,C2CD2L,KCNN4,TYROBP,XBP1,UBE2G2,ARF1,PDPK1,ITGB2,RAC2,CD81,FLNA,LILRB4,UCP2,CCDC88A,KAT7,CYLD,MCRS1,HSPD1,SQSTM1,REST,ZDHHC5,SLC16A1
GO:BP	positive regulation of type I interferon production	GO:0032481	6.5902e+16	2.1811e+16	78	629	13	18017	CTNNB1,DHX9,POLR2H,DDX41,MYD88,SYK,LRRFIP1,HMGB2,RIPK2,EP300,NFKB2,HSPD1,RIOK3
GO:BP	antigen processing and presentation of peptide or polysaccharide antigen via MHC class II	GO:0002504	6680012092699138	2175222751328683	103	629	15	18017	AP1M1,AP2M1,HLA-DRB1,CAPZA1,AP1B1,DNM2,HLA-DRA,AP1G1,CLTC,CTSD,HLA-DPA1,ARF1,HLA-DMA,IFI30,DCTN5
GO:BP	RNA export from nucleus	GO:0006405	6721080472818426	2.17256e+16	144	629	18	18017	NUP214,DHX9,SRSF9,NUP153,SRSF6,DDX39A,SRSF1,KHDRBS1,RAE1,EIF5A,NUP98,RBM8A,SLBP,CPSF6,XPOT,DDX39B,U2AF2,NPM1
GO:BP	establishment of RNA localization	GO:0051236	6767051368838606	2.1696e+16	204	629	22	18017	NUP214,DHX9,C14ORF166,SRSF9,NUP153,SRSF6,KHSRP,DDX39A,SRSF1,YBX1,KHDRBS1,RAE1,EIF5A,NUP98,IGF2BP2,RBM8A,SLBP,CPSF6,XPOT,DDX39B,U2AF2,NPM1
GO:BP	protein ubiquitination	GO:0016567	6808899403942365	2166923082128818	884	629	58	18017	CHP1,CTNNB1,TPP2,PSMD11,ATG3,USP22,VCP,TRAF7,DDA1,RTF1,LIMK1,OTUB1,DERL1,PSMB3,PSME1,FEM1B,HSP90AB1,PSMB7,MED6,PCNP,GPS2,PSMB2,ZNRF1,PSMF1,HSP90AA1,ARRDC3,DDB1,UBR4,KCTD10,MASTL,RNF130,FKBP1A,ANAPC16,UBE2G2,PSMC5,UBE2M,UBXN1,PRPF19,PSMD7,SKP2,DCAF12,FBXW11,ANAPC13,PSMB4,RIPK2,PML,PSMD13,HSPA5,MTA1,RNF4,UBE2K,ARIH1,SQSTM1,PSME2,RNF216,CDC20,U2AF2,PSMD2
GO:BP	mitochondrion organization	GO:0007005	6846324841013309	2.16454e+16	560	629	42	18017	ATG3,CHCHD2,STOML2,TOMM40,TFDP2,GPX1,VDAC1,UQCRC2,CHCHD3,FXN,ATPAF1,DNM2,TIMM23,PPIF,MTX1,PPRC1,SREBF2,SLC25A5,YWHAH,HTRA2,BCL2L1,CDC37,ALAS1,NDUFB9,GABARAP,MAP1LC3B2,HSP90AA1,USP36,YWHAQ,PHB,STAT3,PRDX3,RAC2,MEF2A,EP300,TOMM34,TOMM22,HSPD1,SQSTM1,NDUFS8,NDUFV2,AMBRA1
GO:BP	response to oxygen-containing compound	GO:1901700	7.48244e+16	2125956602202666	1755	629	97	18017	CTNNB1,EZR,CASP3,HLA-DRB1,EHMT2,SIN3A,VCP,LAMTOR1,RAF1,KPNA4,CDK4,PTPN1,GPX1,NAMPT,PTPRE,DCPS,GNAQ,GRB2,BSG,FXN,DNM2,HADHA,GLUL,PRMT5,SHC1,RARA,SIGMAR1,NDEL1,ATP6V1B2,PPIF,GSTP1,PSAP,EIF4EBP1,AKR1B1,PHPT1,ATP2B4,ADNP2,HSP90AB1,TXNIP,HTRA2,BCL2L1,SIRPA,SHMT2,WBP2,ARPC1B,ABHD2,GNB1,SYAP1,CYBA,NET1,BRAF,SRSF6,ACTB,PHB,MYD88,FOXP1,GNAI2,STAT3,TXN,GGH,ATP1A1,JUNB,EDEM1,PRDX3,C2CD2L,LDLR,ATF4,XBP1,TXN2…
GO:BP	regulation of translational initiation	GO:0006446	7639952542713985	2.11691e+16	79	629	13	18017	EIF4EBP1,RBM4,EIF4H,EIF5,EIF1B,KHDRBS1,PPP1CA,ATF4,EIF3E,EIF3B,POLR2G,HSPB1,NPM1
GO:BP	protein folding	GO:0006457	8033742484042384	2.09508e+16	222	629	23	18017	VCP,PFDN5,QSOX1,P4HB,PFDN1,ATF6,CCT3,DERL1,PPIF,HSP90AB1,CDC37,GNB1,HSP90AA1,GNAI2,FKBP1A,GRN,DNAJA2,UBXN1,SGTA,HSPA5,HSPD1,POFUT2,HSPB1
GO:BP	negative regulation of biosynthetic process	GO:0009890	8142942321823112	2089218641395627	1712	629	95	18017	BAZ2A,CTNNB1,EZR,MEPCE,EHMT2,SIN3A,SUPT5H,GATA1,CXXC5,HBP1,TFDP2,PFDN5,RTF1,ZNFX1,NFIC,DRAP1,PRMT5,SHC1,PDS5A,RARA,SREBF2,GSTP1,BMPR2,C1QBP,EIF4EBP1,IKZF5,GATAD2B,DPF2,ATP2B4,TXNIP,SIRPA,H1FX,SHMT2,RBM4,CLTC,GPS2,UNK,KHSRP,PHF12,YWHAQ,PHB,HIPK2,FOXP1,STAT3,MYBBP1A,TXN,CAPRIN1,MBD1,YBX1,KHDRBS1,ATP1A1,SMARCC2,JUNB,LRRFIP1,ENO1,ATF4,PSMC5,STRAP,EIF3E,JUND,TLE3,SKI,FLNA,FOXO3,IGF2BP2,FBXW11,LILRB4,M…
GO:BP	regulation of catalytic activity	GO:0050790	8366005568506356	2077481850684055	2402	629	124	18017	CHP1,CTNNB1,CASP3,HLA-DRB1,HIPK3,DHX9,ADAR,VCP,TRAF7,RAF1,CDK4,PTPN1,GPX1,CCNT1,GNAQ,LIMK1,ARHGAP1,FXN,DNM2,C14ORF166,SHC1,GAPVD1,NDEL1,PPIF,GSTP1,PSAP,PSME1,CCND2,GPS1,FEM1B,PHPT1,CORO1C,ATP2B4,HSP90AB1,TXNIP,RGCC,HTRA2,ANKLE2,CDC37,SIRPA,BCKDK,TBC1D9B,ARHGAP17,GPS2,STRADB,CAPN1,CST3,CTSD,SYAP1,PSMF1,HSP90AA1,CYBA,GNA13,NET1,EIF5,SERPINB2,ARRDC3,BRAF,ACTB,DAZAP2,ILK,MAP2K3,PHB,PFN1,GNAI2,STAT3,A…
GO:BP	regulation of protein stability	GO:0031647	851513020709744	2069808706739363	289	629	27	18017	CHP1,CASP3,GNAQ,CCT3,RAD23A,DERL1,FLOT2,HSP90AB1,CDC37,HSP90AA1,BAG6,USP36,CMTM6,PHB,PFN1,GRN,TYROBP,XBP1,CD81,FLNA,FBXW11,PIM2,EP300,B4GALT5,HSPD1,CCNH,CTSA
GO:BP	response to external stimulus	GO:0009605	8770427229035089	2.05698e+16	2995	629	148	18017	AP1M1,EZR,CASP3,HLA-DRB1,PSMD11,PUM2,EHMT2,SIN3A,DHX9,ADAR,PDLIM7,RAF1,MTPN,CDK4,PTPN1,GPX1,CAPZA1,NAMPT,GNAQ,GRB2,SEC61A1,BSG,ACSL3,GLUL,IFITM2,SHC1,RARA,HLA-DRA,PSMB3,NDEL1,SREBF2,GSTP1,RNASE2,BMPR2,DDX41,C1QBP,EIF4EBP1,PSME1,HSP90AB1,TXNIP,TTLL12,PSMB7,CERS2,AP1G1,BCL2L1,CDC37,SIRPA,SHMT2,RBM4,IRF9,JAK1,GABARAP,MAP1LC3B2,GPS2,PSMB2,MDK,GNB1,TNIP1,PSMF1,PIK3AP1,CYBA,SERPINB2,BRAF,CTSC,BIN2,DROS…
GO:BP	regulation of anatomical structure morphogenesis	GO:0022603	937557693466568	2.028e+16	1218	629	73	18017	CTNNB1,EZR,AP2M1,PSMD11,SIN3A,MYH9,LIMK1,ITGA5,P4HB,ACTN4,DNM2,GLUL,PSMB3,NDEL1,BMPR2,C1QBP,PSME1,CORO1C,ATP2B4,YWHAH,RGCC,PSMB7,JAK1,CLTC,PSMB2,CST3,MDK,PSMF1,GNA13,BRAF,SRSF6,ILK,ARPC2,HIPK2,PFN1,FOXP1,TNFRSF1A,STAT3,CAPRIN1,GRN,FGR,TYROBP,XBP1,PSMC5,CORO1A,RHOH,PGK1,PDPK1,ITGB2,PSMD7,RAC2,DIAPH1,FLNA,GATA2,ZEB2,PSMB4,PML,PSMD13,RHOB,TRIOBP,TNFRSF1B,CDC42SE1,IST1,PREX1,PSME2,MYL12B,PTK2B,CUX1,H…
GO:BP	response to hydrogen peroxide	GO:0042542	1.09825e+16	1.9593e+16	149	629	18	18017	CASP3,KPNA4,GPX1,FXN,SIGMAR1,PPIF,PSAP,TXNIP,SIRPA,NET1,TXN,PRDX3,FOXO3,RHOB,KDM6B,FOXO1,HSPD1,PTK2B
GO:BP	negative regulation of cellular biosynthetic process	GO:0031327	1.18798e+16	1.92519e+16	1681	629	93	18017	BAZ2A,CTNNB1,EZR,MEPCE,EHMT2,SIN3A,SUPT5H,GATA1,CXXC5,HBP1,TFDP2,PFDN5,RTF1,ZNFX1,NFIC,DRAP1,PRMT5,SHC1,PDS5A,RARA,SREBF2,BMPR2,C1QBP,EIF4EBP1,IKZF5,GATAD2B,DPF2,ATP2B4,TXNIP,SIRPA,H1FX,SHMT2,RBM4,CLTC,GPS2,UNK,KHSRP,PHF12,YWHAQ,PHB,HIPK2,FOXP1,STAT3,MYBBP1A,TXN,CAPRIN1,MBD1,YBX1,KHDRBS1,ATP1A1,SMARCC2,JUNB,LRRFIP1,ENO1,ATF4,PSMC5,STRAP,EIF3E,JUND,TLE3,SKI,FLNA,FOXO3,IGF2BP2,FBXW11,LILRB4,MEF2A,C…
GO:BP	SCF-dependent proteasomal ubiquitin-dependent protein catabolic process	GO:0031146	1.23878e+16	1.90701e+16	95	629	14	18017	PSMD11,PSMB3,PSME1,PSMB7,PSMB2,PSMF1,PSMC5,PSMD7,SKP2,FBXW11,PSMB4,PSMD13,PSME2,PSMD2
GO:BP	type I interferon signaling pathway	GO:0060337	1.23878e+16	1.90701e+16	95	629	14	18017	ADAR,PTPN1,IFITM2,HSP90AB1,TTLL12,CDC37,IRF9,JAK1,MYD88,IFNAR2,IFITM1,IFITM3,PTPN6,UBE2K
GO:BP	cellular response to type I interferon	GO:0071357	1.23878e+16	1.90701e+16	95	629	14	18017	ADAR,PTPN1,IFITM2,HSP90AB1,TTLL12,CDC37,IRF9,JAK1,MYD88,IFNAR2,IFITM1,IFITM3,PTPN6,UBE2K
GO:BP	regulation of small molecule metabolic process	GO:0062012	1.25227e+16	1.9023e+16	458	629	36	18017	PSMD11,NUP214,VCP,PSMB3,PGAM1,SREBF2,PSME1,ATP2B4,PSMB7,CLTC,PSMB2,NUP153,PSMF1,ARNT,DDB1,STAT3,ODC1,ENO1,PPP1CA,LDLR,RAE1,PSMC5,PSMD7,NUP98,LPCAT3,ADIPOR1,PSMB4,EP300,PSMD13,FOXO1,PSME2,REST,PTK2B,CLK2,ADM,PSMD2
GO:BP	negative regulation of macromolecule biosynthetic process	GO:0010558	1294263020041541	1887977457403666	1615	629	90	18017	BAZ2A,CTNNB1,EZR,MEPCE,EHMT2,SIN3A,SUPT5H,GATA1,CXXC5,HBP1,TFDP2,PFDN5,RTF1,ZNFX1,NFIC,DRAP1,PRMT5,SHC1,PDS5A,RARA,SREBF2,GSTP1,BMPR2,C1QBP,EIF4EBP1,IKZF5,GATAD2B,DPF2,TXNIP,H1FX,SHMT2,RBM4,CLTC,GPS2,UNK,KHSRP,PHF12,YWHAQ,PHB,HIPK2,FOXP1,STAT3,MYBBP1A,TXN,CAPRIN1,MBD1,YBX1,KHDRBS1,SMARCC2,JUNB,LRRFIP1,ENO1,ATF4,PSMC5,STRAP,EIF3E,JUND,TLE3,SKI,FLNA,FOXO3,IGF2BP2,FBXW11,LILRB4,MEF2A,CIC,HMGB2,MORF4…
GO:BP	regulation of neuron death	GO:1901214	1.33361e+16	1874971000255701	331	629	29	18017	CHP1,CTNNB1,CASP3,MYBL2,SIGMAR1,HSP90AB1,HTRA2,BCL2L1,MDK,CTSZ,BRAF,ILK,HIPK2,CHMP4B,STAT3,GRN,ATF4,TYROBP,UBE2M,CORO1A,PDPK1,ITGB2,FOXO3,MCL1,TNFRSF1B,HSPD1,REST,PTK2B,AMBRA1
GO:BP	Wnt signaling pathway, planar cell polarity pathway	GO:0060071	1.36956e+16	1.86342e+16	109	629	15	18017	AP2M1,PSMD11,PSMB3,PSME1,PSMB7,CLTC,PSMB2,PSMF1,PFN1,PSMC5,PSMD7,PSMB4,PSMD13,PSME2,PSMD2
GO:BP	regulation of erythrocyte differentiation	GO:0045646	1431294958332755	1.84427e+16	49	629	10	18017	INPP5D,GATA1,KLF13,PRMT1,ARNT,STAT3,FOXO3,HMGB2,GATA2,KAT7
GO:BP	positive regulation of substrate adhesion-dependent cell spreading	GO:1900026	1.43604e+16	1.84283e+16	39	629	9	18017	P4HB,DNM2,C1QBP,MDK,BRAF,ARPC2,FLNA,TRIOBP,PREX1
GO:BP	defense response to other organism	GO:0098542	1.49468e+16	1.82545e+16	1212	629	72	18017	HLA-DRB1,PSMD11,PUM2,SIN3A,DHX9,ADAR,RAF1,PTPN1,CAPZA1,SEC61A1,IFITM2,SHC1,HLA-DRA,PSMB3,RNASE2,DDX41,C1QBP,PSME1,HSP90AB1,TTLL12,PSMB7,AP1G1,BCL2L1,CDC37,SIRPA,SHMT2,IRF9,JAK1,PSMB2,PSMF1,CYBA,DROSHA,PHB,ACTR3,MYD88,FOXP1,TNFRSF1A,SYK,GRN,FGR,IFNAR2,HLA-DPA1,TYROBP,PSMC5,CORO1A,PDPK1,PSMD7,ZC3HAV1,ICAM2,SKP2,FLNA,IFITM1,FBXW11,IFITM3,HMGB2,IFI30,PSMB4,RIPK2,EP300,PML,PSMD13,PTPN6,CYLD,UBE2K,ELF4…
GO:BP	transcription-coupled nucleotide-excision repair	GO:0006283	1588678694753145	1.79896e+16	72	629	12	18017	LIG1,POLD2,POLR2H,GPS1,RPA1,DDB1,PRPF19,POLR2G,EP300,COPS3,CCNH,RFC2
GO:BP	regulation of mitotic cell cycle phase transition	GO:1901990	1668614622361651	1777643954937051	445	629	35	18017	ECD,MEPCE,PSMD11,ORC1,SIN3A,TFDP2,CDK4,CTDSP1,PSMB3,PSME1,CCND2,PRMT1,BUB3,RGCC,PSMB7,PSMB2,PSMF1,HSP90AA1,DDB1,ANAPC16,PSMC5,PSMD7,SSNA1,PSMB4,EP300,PLAGL1,PML,PSMD13,PTPN6,MAD2L1BP,PSME2,CTDSP2,CDC20,CNOT2,PSMD2
GO:BP	protein export from nucleus	GO:0006611	1687223833474826	1.77283e+16	184	629	20	18017	CHP1,NUP214,SRSF9,STRADB,NUP153,RBM22,SRSF6,DDX39A,SRSF1,TXN,RAE1,EIF5A,NUP98,RBM8A,SLBP,XPOT,DDX39B,EGR2,U2AF2,NPM1
GO:BP	viral translational termination-reinitiation	GO:0075525	1.70358e+16	1.76864e+16	5	629	4	18017	EIF3D,EIF3A,EIF3B,EIF3L
GO:BP	response to interleukin-12	GO:0070671	1.73374e+16	1.76102e+16	50	629	10	18017	CAPZA1,P4HB,SIRPA,TALDO1,JAK1,SERPINB2,ARF1,RIPK2,SNRPA1,PSME2
GO:BP	regulation of cell cycle phase transition	GO:1901987	1.74752e+16	1757579009507178	484	629	37	18017	ECD,MEPCE,PSMD11,ORC1,SIN3A,TFDP2,CDK4,CTDSP1,PSMB3,PSME1,CCND2,PRMT1,BUB3,ATP2B4,RGCC,PSMB7,PSMB2,PSMF1,HSP90AA1,DDB1,ANAPC16,PSMC5,PSMD7,SSNA1,PSMB4,EP300,PLAGL1,PML,PSMD13,PTPN6,MAD2L1BP,PSME2,CTDSP2,CDC20,CNOT2,PSMD2,NPM1
GO:BP	response to organic cyclic compound	GO:0014070	1.79555e+16	1.7458e+16	977	629	61	18017	CTNNB1,EZR,CASP3,EHMT2,SIN3A,DHX9,CDK4,NAMPT,BSG,ACSL3,DNM2,PRMT5,RARA,GSTP1,EIF4EBP1,ATP2B4,HSP90AB1,TXNIP,YWHAH,BCL2L1,SHMT2,WBP2,ARPC1B,TIPARP,ABHD2,PSMB2,MDK,GNB1,CYBA,BRAF,ACTB,EPHX1,PHB,FOXP1,STAT3,ATP1A1,JUNB,ATF4,RAE1,TXN2,JUND,DIAPH1,SKP2,FLNA,FOXO3,MBD4,HMGB2,RIPK2,EP300,HSPA5,FOXO1,HSPD1,NCSTN,REST,PTK2B,RIOK3,SLC16A1,CNOT2,ADM,IL1RN,NPM1
GO:BP	regulation of canonical Wnt signaling pathway	GO:0060828	1815629201558532	1.74097e+16	301	629	27	18017	CTNNB1,PSMD11,VCP,PFDN5,GNAQ,ATP6AP2,PSMB3,PSME1,PSMB7,PSMB2,MDK,PSMF1,ILK,PPP1CA,PSMC5,SCYL2,TLE3,PSMD7,FOXO3,CTDNEP1,CSNK1A1,PSMB4,PSMD13,CYLD,FOXO1,PSME2,PSMD2
GO:BP	regulation of establishment of planar polarity	GO:0090175	1922331813258088	1.71617e+16	112	629	15	18017	AP2M1,PSMD11,PSMB3,PSME1,PSMB7,CLTC,PSMB2,PSMF1,PFN1,PSMC5,PSMD7,PSMB4,PSMD13,PSME2,PSMD2
GO:BP	response to interferon-beta	GO:0035456	1945631570103232	1.71094e+16	31	629	8	18017	IFITM2,DDX41,HTRA2,IFNAR2,UBE2G2,IFITM1,IFITM3,UBE2K
GO:BP	negative regulation of nucleic acid-templated transcription	GO:1903507	1.99519e+16	1.70001e+16	1312	629	76	18017	BAZ2A,CTNNB1,EZR,MEPCE,EHMT2,SIN3A,SUPT5H,GATA1,CXXC5,HBP1,TFDP2,PFDN5,RTF1,ZNFX1,NFIC,DRAP1,PRMT5,SHC1,RARA,SREBF2,C1QBP,IKZF5,GATAD2B,DPF2,TXNIP,H1FX,GPS2,PHF12,YWHAQ,PHB,HIPK2,FOXP1,STAT3,MYBBP1A,TXN,MBD1,KHDRBS1,SMARCC2,JUNB,LRRFIP1,ENO1,ATF4,PSMC5,STRAP,JUND,TLE3,SKI,FLNA,FOXO3,FBXW11,LILRB4,MEF2A,CIC,HMGB2,MORF4L2,GATA2,BHLHE40,ZEB2,SATB1,EP300,KAT7,PML,KDM5C,MTA1,FOXO1,LANCL2,RCOR1,SQSTM1,…
GO:BP	regulation of reactive oxygen species metabolic process	GO:2000377	2.01498e+16	1695729459488913	202	629	21	18017	GRB2,VDAC1,DNM2,GSTP1,ATP2B4,HSP90AB1,SIRPA,HSP90AA1,CYBA,KHSRP,GNAI2,STAT3,SYK,TYROBP,ITGB2,RAC2,FOXO3,ARF4,FOXO1,HSPD1,PTK2B
GO:BP	antigen processing and presentation of peptide antigen via MHC class I	GO:0002474	2025776659916025	1.69341e+16	99	629	14	18017	PSMD11,PSMB3,PSME1,PSMB7,PSMB2,PSMF1,CYBA,PSMC5,PSMD7,IFI30,PSMB4,PSMD13,PSME2,PSMD2
GO:BP	negative regulation of RNA biosynthetic process	GO:1902679	2.10559e+16	1.67663e+16	1314	629	76	18017	BAZ2A,CTNNB1,EZR,MEPCE,EHMT2,SIN3A,SUPT5H,GATA1,CXXC5,HBP1,TFDP2,PFDN5,RTF1,ZNFX1,NFIC,DRAP1,PRMT5,SHC1,RARA,SREBF2,C1QBP,IKZF5,GATAD2B,DPF2,TXNIP,H1FX,GPS2,PHF12,YWHAQ,PHB,HIPK2,FOXP1,STAT3,MYBBP1A,TXN,MBD1,KHDRBS1,SMARCC2,JUNB,LRRFIP1,ENO1,ATF4,PSMC5,STRAP,JUND,TLE3,SKI,FLNA,FOXO3,FBXW11,LILRB4,MEF2A,CIC,HMGB2,MORF4L2,GATA2,BHLHE40,ZEB2,SATB1,EP300,KAT7,PML,KDM5C,MTA1,FOXO1,LANCL2,RCOR1,SQSTM1,…
GO:BP	defense response	GO:0006952	2.14056e+16	1.66947e+16	1823	629	98	18017	HLA-DRB1,PSMD11,PUM2,SIN3A,DHX9,ADAR,RAF1,PTPN1,GPX1,CAPZA1,NAMPT,SEC61A1,VDAC1,IFITM2,SHC1,HLA-DRA,PSMB3,GSTP1,RNASE2,DDX41,C1QBP,PSME1,HSP90AB1,TTLL12,PSMB7,AP1G1,BCL2L1,CDC37,SIRPA,SHMT2,IRF9,JAK1,GPS2,PSMB2,CST3,MDK,TNIP1,PSMF1,PIK3AP1,CYBA,CTSC,LSP1,MAP2K3,DROSHA,PHB,ACTR3,MYD88,FOXP1,TNFRSF1A,STAT3,SPATA2,SYK,GRN,FGR,IFNAR2,HLA-DPA1,KCNN4,LDLR,TYROBP,CSF3R,PSMC5,CORO1A,PDPK1,ITGB2,PSMD7,ZC3…
GO:BP	negative regulation of transcription, DNA-templated	GO:0045892	2.16608e+16	1664326026260935	1270	629	74	18017	BAZ2A,CTNNB1,EZR,MEPCE,EHMT2,SIN3A,SUPT5H,GATA1,CXXC5,HBP1,TFDP2,PFDN5,RTF1,ZNFX1,NFIC,DRAP1,SHC1,RARA,SREBF2,C1QBP,IKZF5,GATAD2B,DPF2,TXNIP,H1FX,GPS2,PHF12,YWHAQ,PHB,HIPK2,FOXP1,STAT3,MYBBP1A,TXN,MBD1,KHDRBS1,SMARCC2,JUNB,LRRFIP1,ENO1,ATF4,PSMC5,STRAP,JUND,SKI,FLNA,FOXO3,FBXW11,LILRB4,MEF2A,CIC,HMGB2,MORF4L2,GATA2,BHLHE40,ZEB2,SATB1,EP300,KAT7,PML,KDM5C,MTA1,FOXO1,LANCL2,RCOR1,SQSTM1,PA2G4,ZC3H4…
GO:BP	cellular component disassembly	GO:0022411	2.18262e+16	1.66102e+16	567	629	41	18017	CTNNB1,CASP3,ATG3,MRPL38,VCP,MTPN,CAPZA1,VDAC1,BSG,CAPNS1,ARID2,NDEL1,SREBF2,HTRA2,CDC37,GABARAP,MAP1LC3B2,CAPN1,FSCN1,CST3,USP36,SMARCC2,PTCD3,PPP1CA,CCNB2,SH3BP1,EIF5A,UFC1,HMGB2,SH3GL1,TIMP2,CTDNEP1,CSNK1A1,KPNA1,TRIOBP,MRPL53,TMEM39A,IST1,SQSTM1,AMBRA1,STX5
GO:BP	Wnt signaling pathway	GO:0016055	2216791142946267	1.65428e+16	528	629	39	18017	CTNNB1,AP2M1,PSMD11,VCP,HBP1,PFDN5,RTF1,GNAQ,ATP6AP2,PSMB3,PSME1,PSMB7,CLTC,PSMB2,MDK,GNB1,PSMF1,DDB1,ILK,PFN1,PPP1CA,PSMC5,SCYL2,TLE3,PSMD7,SKI,FOXO3,FBXW11,CTDNEP1,ZEB2,CSNK1A1,PSMB4,PSMD13,CYLD,FOXO1,GRK6,PPP2CA,PSME2,PSMD2
GO:BP	response to oxidative stress	GO:0006979	2.22345e+16	1.65297e+16	470	629	36	18017	CTNNB1,CASP3,SIN3A,KPNA4,GPX1,P4HB,FXN,DNM2,SIGMAR1,PPIF,GSTP1,PSAP,ADNP2,TXNIP,HTRA2,SIRPA,CYBA,NET1,MSRB2,ARNT,TXN,PRDX3,ATF4,TXN2,FOXO3,MCL1,UCP2,PML,RHOB,KDM6B,FOXO1,HSPD1,NDUFS8,REST,PTK2B,HSPB1
GO:BP	negative regulation of cell cycle phase transition	GO:1901988	2.27173e+16	1.64364e+16	270	629	25	18017	PSMD11,ORC1,TFDP2,CDK4,CTDSP1,PSMB3,PSME1,PRMT1,BUB3,RGCC,PSMB7,PSMB2,PSMF1,PSMC5,PSMD7,PSMB4,EP300,PLAGL1,PML,PSMD13,PSME2,CTDSP2,CDC20,CNOT2,PSMD2
GO:BP	anatomical structure morphogenesis	GO:0009653	2.36879e+16	1.62547e+16	2849	629	140	18017	CTNNB1,EZR,AP2M1,CASP3,PSMD11,SIN3A,GATA1,PDLIM7,NOLC1,MTPN,GPX1,RTF1,MYH9,LIMK1,ITGA5,NFIC,P4HB,ACTN4,GRB2,BSG,ATP6AP2,LIG1,NUMB,DNM2,GLUL,SHC1,ARID2,RARA,PSMB3,NDEL1,PSAP,BMPR2,C1QBP,PSME1,FEM1B,CORO1C,ATP2B4,HSP90AB1,YWHAH,RGCC,PSMB7,BCL2L1,JAK1,TIPARP,CLTC,PSMB2,C12ORF57,STRADB,CAPN1,PBX2,CST3,MDK,PSMF1,HSP90AA1,SOX12,MBOAT7,SHB,UNK,CTSZ,GNA13,BRAF,SRSF6,ACTB,ILK,ARPC2,HIPK2,PFN1,FOXP1,TNFRSF…
GO:BP	regulation of type I interferon production	GO:0032479	2.37837e+16	1.62372e+16	128	629	16	18017	CTNNB1,DHX9,POLR2H,DDX41,SIRPA,MYD88,SYK,LRRFIP1,HMGB2,RIPK2,EP300,CYLD,NFKB2,HSPD1,RNF216,RIOK3
GO:BP	cell-cell signaling by wnt	GO:0198738	2419077827134107	1.61635e+16	530	629	39	18017	CTNNB1,AP2M1,PSMD11,VCP,HBP1,PFDN5,RTF1,GNAQ,ATP6AP2,PSMB3,PSME1,PSMB7,CLTC,PSMB2,MDK,GNB1,PSMF1,DDB1,ILK,PFN1,PPP1CA,PSMC5,SCYL2,TLE3,PSMD7,SKI,FOXO3,FBXW11,CTDNEP1,ZEB2,CSNK1A1,PSMB4,PSMD13,CYLD,FOXO1,GRK6,PPP2CA,PSME2,PSMD2
GO:BP	regulation of RNA splicing	GO:0043484	2512180311769411	1.59995e+16	158	629	18	18017	PTBP1,THRAP3,C1QBP,SMU1,RBM4,SRSF9,CLK3,RBM22,SRSF6,SRSF1,KHDRBS1,PRPF19,NUP98,RBM8A,REST,CLK2,TRA2A,U2AF2
GO:BP	chromosome organization	GO:0051276	2514977069228826	1.59947e+16	1253	629	73	18017	BAZ2A,CTNNB1,EHMT2,SIN3A,DHX9,USP22,GATA1,SMC1A,RTF1,ZNFX1,TSPYL1,OTUB1,CCT3,PRMT5,PDS5A,POLD2,ARID2,YLPM1,GPS1,GATAD2B,DPF2,RPA1,PRMT1,BUB3,HSP90AB1,TTLL12,H1FX,WBP2,SUPT7L,HSP90AA1,BAG6,EPC2,USP36,ASF1B,DDB1,ACTB,PHB,ARID4B,CHMP4B,NAP1L4,SMARCC2,TRRAP,NAF1,NSL1,RAE1,MCM5,RSBN1,SKI,HMGB2,MORF4L2,GATA2,SATB1,EP300,COPS3,KAT7,PML,KDM5C,MTA1,RNF4,KDM6B,MCRS1,PPP1R10,RCOR1,RFC2,REST,CHAMP1,HJURP,CDC…
GO:BP	negative regulation of canonical Wnt signaling pathway	GO:0090090	2.52485e+16	1.59776e+16	189	629	20	18017	PSMD11,PFDN5,PSMB3,PSME1,PSMB7,PSMB2,MDK,PSMF1,PSMC5,SCYL2,TLE3,PSMD7,FOXO3,CSNK1A1,PSMB4,PSMD13,CYLD,FOXO1,PSME2,PSMD2
GO:BP	positive regulation of hemopoiesis	GO:1903708	25316798099943	1596591221856006	205	629	21	18017	INPP5D,HLA-DRB1,GATA1,RARA,PRMT1,MDK,SOX12,ARNT,STAT3,SYK,TYROBP,XBP1,RHOH,FOXO3,LILRB4,HMGB2,GATA2,RIPK2,KAT7,CYLD,PPP2R3C
GO:BP	innate immune response	GO:0045087	2.53291e+16	1.59638e+16	988	629	61	18017	HLA-DRB1,PSMD11,SIN3A,DHX9,ADAR,RAF1,PTPN1,CAPZA1,SEC61A1,IFITM2,HLA-DRA,PSMB3,C1QBP,PSME1,HSP90AB1,TTLL12,PSMB7,AP1G1,CDC37,SIRPA,SHMT2,IRF9,JAK1,PSMB2,PSMF1,CYBA,PHB,ACTR3,MYD88,SYK,GRN,FGR,IFNAR2,HLA-DPA1,TYROBP,PSMC5,CORO1A,PDPK1,PSMD7,ZC3HAV1,ICAM2,SKP2,IFITM1,FBXW11,IFITM3,HMGB2,IFI30,PSMB4,RIPK2,EP300,PML,PSMD13,PTPN6,CYLD,UBE2K,ELF4,PSME2,PPP1R14B,PTK2B,RIOK3,PSMD2
GO:BP	negative regulation of cellular macromolecule biosynthetic process	GO:2000113	2.54619e+16	1.59411e+16	1550	629	86	18017	BAZ2A,CTNNB1,EZR,MEPCE,EHMT2,SIN3A,SUPT5H,GATA1,CXXC5,HBP1,TFDP2,PFDN5,RTF1,ZNFX1,NFIC,DRAP1,SHC1,PDS5A,RARA,SREBF2,BMPR2,C1QBP,EIF4EBP1,IKZF5,GATAD2B,DPF2,TXNIP,H1FX,SHMT2,RBM4,GPS2,UNK,KHSRP,PHF12,YWHAQ,PHB,HIPK2,FOXP1,STAT3,MYBBP1A,TXN,CAPRIN1,MBD1,YBX1,KHDRBS1,SMARCC2,JUNB,LRRFIP1,ENO1,ATF4,PSMC5,STRAP,EIF3E,JUND,SKI,FLNA,FOXO3,IGF2BP2,FBXW11,LILRB4,MEF2A,CIC,HMGB2,MORF4L2,GATA2,BHLHE40,ZEB2,…
GO:BP	IRES-dependent viral translational initiation	GO:0075522	2.64731e+16	1.5772e+16	10	629	5	18017	PTBP1,EIF3F,EIF3D,EIF3A,EIF3B
GO:BP	positive regulation of molecular function	GO:0044093	2.68341e+16	1.57131e+16	1833	629	98	18017	CHP1,CTNNB1,CASP3,HLA-DRB1,DHX9,VCP,TRAF7,RAF1,MTPN,PTPN1,CCNT1,GNAQ,ACTN4,ARHGAP1,EIF3C,FXN,DNM2,DERL1,SHC1,RARA,GAPVD1,NDEL1,PPRC1,PSAP,PSME1,CCND2,CORO1C,ATP2B4,FLOT2,HSP90AB1,RGCC,HTRA2,TBC1D9B,ARHGAP17,STRADB,CTSD,SYAP1,HSP90AA1,CYBA,GNA13,NET1,EIF5,ARRDC3,BRAF,DAZAP2,ILK,MAP2K3,PHB,MYD88,HIPK2,PFN1,GNAI2,EIF3D,STAT3,MASTL,SYK,TXN,FKBP1A,GRN,JTB,LRRFIP1,FGR,NAF1,DENND1A,PRDX3,DNAJA2,SH3BP1,E…
GO:BP	regulation of intracellular transport	GO:0032386	2.76773e+16	1557875864301559	362	629	30	18017	CHP1,EZR,NUP214,DHX9,NOLC1,TFDP2,PTPN1,ARHGAP1,NDEL1,SREBF2,HSP90AB1,YWHAH,HTRA2,RBM4,NUP153,RBM22,USP36,YWHAQ,TXN,KHDRBS1,EDEM1,UBE2G2,ARF1,ITGB2,RAC2,CD81,FLNA,CPSF6,MTMR2,EHD1
GO:BP	regulation of multicellular organismal process	GO:0051239	2891267626746413	1.53891e+16	3441	629	163	18017	CTNNB1,EZR,INPP5D,AP2M1,HLA-DRB1,PSMD11,PUM2,SIN3A,DHX9,GATA1,KLF13,PDLIM7,MTPN,CDK4,GPX1,CTDSP1,LIMK1,ITGA5,PLEKHM1,ATP6AP2,FXN,NUMB,DNM2,GLUL,PRMT5,RARA,PSMB3,NDEL1,POLR2H,GSTP1,BMPR2,DDX41,C1QBP,PSME1,DPF2,PRMT1,CORO1C,ATP2B4,HSP90AB1,YWHAH,RGCC,PSMB7,CERS2,HTRA2,SIRPA,JAK1,CLTC,PSMB2,C12ORF57,CST3,MDK,PSMF1,SOX12,BAG6,CYBA,CTSZ,SERPINB2,ARNT,ARRDC3,BRAF,SRSF6,ILK,KHSRP,CTSC,MAP2K3,DROSHA,PHB,…
GO:BP	type I interferon production	GO:0032606	2.90285e+16	1.53718e+16	130	629	16	18017	CTNNB1,DHX9,POLR2H,DDX41,SIRPA,MYD88,SYK,LRRFIP1,HMGB2,RIPK2,EP300,CYLD,NFKB2,HSPD1,RNF216,RIOK3
GO:BP	neuron apoptotic process	GO:0051402	3.15695e+16	1.50073e+16	258	629	24	18017	CTNNB1,CASP3,MYBL2,SIGMAR1,HSP90AB1,BCL2L1,MDK,CTSZ,BRAF,ILK,HIPK2,GRN,ATF4,TYROBP,UBE2M,CORO1A,PDPK1,FOXO3,MCL1,HSPA5,HSPD1,NCSTN,PTK2B,AMBRA1
GO:BP	positive regulation of lamellipodium organization	GO:1902745	3219378413439793	1.49223e+16	33	629	8	18017	DNM2,CORO1C,FSCN1,BRK1,ARPC2,ACTR3,RAC2,WASF2
GO:BP	cellular response to interleukin-4	GO:0071353	3219378413439793	1.49223e+16	33	629	8	18017	CDK4,HSP90AB1,XBP1,CORO1A,PML,HSPA5,RPL3,IL2RG
GO:BP	regulation of mRNA splicing, via spliceosome	GO:0048024	3292650491620273	1.48245e+16	117	629	15	18017	PTBP1,THRAP3,C1QBP,SMU1,RBM4,SRSF9,SRSF6,SRSF1,KHDRBS1,PRPF19,NUP98,RBM8A,REST,TRA2A,U2AF2
GO:BP	signal transduction	GO:0007165	333031860295598	1.47751e+16	6291	629	270	18017	CHP1,CTNNB1,EZR,FCGR2A,INPP5D,AP2M1,CASP3,HLA-DRB1,PSMD11,HIPK3,NOP2,PUM2,EHMT2,PPP4C,ADAR,GATA1,STOML2,VCP,PTBP1,TRAF7,CXXC5,HBP1,LAMTOR1,RAF1,TFDP2,CDK4,PTPN1,GPX1,CAPZA1,PFDN5,TPP1,NAMPT,PTPRE,PI4KB,RTF1,MYH9,GNAQ,LIMK1,ITGA5,P4HB,ACTN4,GRB2,BSG,PLEKHM1,ATP6AP2,SLC20A1,ARHGAP1,ATF6,FXN,DNM2,DERL1,IFITM2,PRMT5,SHC1,RARA,SIGMAR1,HLA-DRA,PSMB3,GAPVD1,ZDHHC3,NDEL1,POLR2H,ATP6V1B2,FIBP,PPIF,SREBF2,…
GO:BP	regulation of protein modification by small protein conjugation or removal	GO:1903320	3364540945542096	1473074182084256	242	629	23	18017	CHP1,CTNNB1,VCP,LIMK1,OTUB1,DERL1,FEM1B,HSP90AB1,GPS2,TNIP1,HSP90AA1,ARNT,ARRDC3,MASTL,FKBP1A,UBXN1,SKP2,RIPK2,HSPA5,MTA1,SQSTM1,CDC20,U2AF2
GO:BP	regulation of neuron apoptotic process	GO:0043523	3.53869e+16	1.45116e+16	226	629	22	18017	CTNNB1,CASP3,MYBL2,SIGMAR1,HSP90AB1,BCL2L1,MDK,CTSZ,BRAF,ILK,HIPK2,GRN,ATF4,TYROBP,UBE2M,CORO1A,PDPK1,FOXO3,MCL1,HSPD1,PTK2B,AMBRA1
GO:BP	apoptotic signaling pathway	GO:0097190	3542246559483258	1450721212853369	619	629	43	18017	CTNNB1,CASP3,GATA1,TRAF7,RAF1,TFDP2,PTPN1,GPX1,P4HB,FXN,ZDHHC3,PPIF,GSTP1,SLC25A5,FEM1B,DPF2,YWHAH,HTRA2,BCL2L1,GABARAP,STRADB,BAG6,CTSC,YWHAQ,HIPK2,GNAI2,TNFRSF1A,MYBBP1A,ENO1,PPP1CA,ATF4,TYROBP,XBP1,PDPK1,FOXO3,MCL1,HMGB2,EP300,PML,CYLD,TNFRSF1B,UBE2K,HSPB1
GO:BP	G2/M transition of mitotic cell cycle	GO:0000086	3590955993495903	1.44479e+16	260	629	24	18017	PSMD11,ORC1,SIN3A,CDK4,DNM2,PSMB3,PSME1,PSMB7,PSMB2,PSMF1,HSP90AA1,MASTL,KHDRBS1,CCNB2,PSMC5,PSMD7,SSNA1,SKP2,FBXW11,PSMB4,PSMD13,CCNH,PSME2,PSMD2
GO:BP	viral transcription	GO:0019083	3689421856073998	1.43304e+16	178	629	19	18017	NUP214,SUPT5H,DHX9,CCNT1,POLR2H,NUP153,PFN1,RPL8,RAE1,NUP98,IFITM3,RPS18,POLR2G,RPS5,EP300,RPL3,REST,RPL36A,RPL24
GO:BP	response to inorganic substance	GO:0010035	3731935409294631	1.42807e+16	580	629	41	18017	CASP3,VCP,KPNA4,CDK4,GPX1,BSG,FXN,CUTA,DNM2,SIGMAR1,PPIF,PSAP,AKR1B1,ATP2B4,TXNIP,SIRPA,UROS,NET1,BRAF,TXN,GGH,JUNB,PRDX3,PPP1CA,ATF4,NDRG1,JUND,SLC40A1,FOXO3,MEF2A,UCP2,SLC30A1,CACYBP,RHOB,HSPA5,KDM6B,FOXO1,HSPD1,NCSTN,PPP2CA,PTK2B
GO:BP	cell cycle G2/M phase transition	GO:0044839	3755297316620588	142535567307897	278	629	25	18017	PSMD11,ORC1,SIN3A,CDK4,DNM2,PSMB3,PSME1,PSMB7,PSMB2,PSMF1,HSP90AA1,MASTL,KHDRBS1,CCNB2,PSMC5,PSMD7,SSNA1,SKP2,FBXW11,PSMB4,PSMD13,CCNH,PSME2,PSMD2,NPM1
GO:BP	non-canonical Wnt signaling pathway	GO:0035567	3942322978751753	1.40425e+16	148	629	17	18017	CTNNB1,AP2M1,PSMD11,PSMB3,PSME1,PSMB7,CLTC,PSMB2,GNB1,PSMF1,PFN1,PSMC5,PSMD7,PSMB4,PSMD13,PSME2,PSMD2
GO:BP	morphogenesis of a polarized epithelium	GO:0001738	3942322978751753	1.40425e+16	148	629	17	18017	AP2M1,PSMD11,PSMB3,PSME1,PSMB7,CLTC,PSMB2,PSMF1,ACTB,PFN1,SH3BP1,PSMC5,PSMD7,PSMB4,PSMD13,PSME2,PSMD2
GO:BP	positive regulation of lamellipodium assembly	GO:0010592	4040503231684213	1393564541539615	25	629	7	18017	DNM2,FSCN1,BRK1,ARPC2,ACTR3,RAC2,WASF2
GO:BP	regulation of proteolysis involved in cellular protein catabolic process	GO:1903050	4063440887928863	139110605367491	228	629	22	18017	VCP,DDA1,GPX1,RAD23A,PSME1,HSP90AB1,PSMF1,BAG6,CTSC,HIPK2,ZFAND2A,EDEM1,UBE2G2,UBXN1,CSNK1A1,SGTA,PML,UBE2K,ARIH1,PSME2,PTK2B,CDC20
GO:BP	positive regulation of cell population proliferation	GO:0008284	4355485376093472	1.36096e+16	984	629	60	18017	CTNNB1,NOP2,DHX9,GATA1,NOLC1,CDK4,NAMPT,FXN,CAPNS1,GLUL,SHC1,RARA,SLC25A5,BMPR2,AKR1B1,CCND2,PRMT1,BCL2L1,SHMT2,CAPN1,MDK,BRK1,CYBA,CTSZ,ARNT,SRSF6,ILK,PHB,MYD88,HIPK2,FOXP1,GNAI2,STAT3,SYK,ODC1,GRN,HLA-DPA1,PRDX3,DNAJA2,XBP1,EIF5A,CORO1A,PDPK1,RAC2,CD81,SKP2,FLNA,CDK13,HMGB2,GATA2,RIPK2,KAT7,PML,SSR1,PTPN6,DDX39B,PTK2B,CDC20,ADM,NPM1
GO:BP	cellular response to oxidative stress	GO:0034599	4381769825252162	1.35835e+16	316	629	27	18017	CTNNB1,SIN3A,GPX1,P4HB,FXN,DNM2,SIGMAR1,PPIF,GSTP1,PSAP,ADNP2,HTRA2,SIRPA,CYBA,NET1,ARNT,TXN,PRDX3,ATF4,FOXO3,MCL1,PML,RHOB,KDM6B,FOXO1,REST,HSPB1
GO:BP	organonitrogen compound biosynthetic process	GO:1901566	4458475869070144	1.35081e+16	1856	629	98	18017	CHP1,CTNNB1,MRPL38,PUM2,DHX9,GATA1,STOML2,VCP,PTBP1,NOLC1,MTPN,CDK4,NAMPT,SLC39A8,SLC25A39,EIF3C,ACSL3,FXN,GLUL,RPN2,RARA,ZDHHC3,GSTP1,PCBD1,BMPR2,C1QBP,EIF4EBP1,EEF1D,PRMT1,ATP2B4,CERS2,SHMT2,ALAS1,RBM4,CLTC,TNIP1,FARSA,UROS,EIF3F,UNK,EIF4H,EIF5,KHSRP,EIF1B,MPC1,TNFRSF1A,EIF3D,STAT3,SYK,CAPRIN1,YBX1,KHDRBS1,PTCD3,ODC1,RPL8,EIF3A,ENO1,PPP1CA,ATF4,EIF3E,EIF5A,CHST11,EIF3M,FOXO3,IGF2BP2,HSD17B12,RB…
GO:BP	regulation of transferase activity	GO:0051338	4506738501826137	1.34614e+16	1029	629	62	18017	CHP1,CTNNB1,CASP3,HLA-DRB1,HIPK3,ADAR,TRAF7,RAF1,CDK4,PTPN1,CCNT1,GNAQ,LIMK1,C14ORF166,SHC1,GSTP1,CCND2,GPS1,FEM1B,PHPT1,CORO1C,ATP2B4,HSP90AB1,RGCC,CDC37,GPS2,STRADB,SYAP1,HSP90AA1,ARRDC3,BRAF,ACTB,DAZAP2,ILK,MAP2K3,PHB,MASTL,SYK,TXN,JTB,FGR,NAF1,PRDX3,CCNB2,RHOH,PDPK1,SPRED2,RAC2,CD81,ZEB2,CCDC88A,RIPK2,PTPN6,CCNH,PPP2CA,RFC2,PPP2R3C,PTK2B,CDC20,HSPB1,AMBRA1,NPM1
GO:BP	positive regulation of proteolysis	GO:0045862	4673869170159169	1.33032e+16	372	629	30	18017	VCP,DDA1,MYH9,RAD23A,PSME1,HTRA2,CTSD,TNIP1,BAG6,CTSC,ZFAND2A,STAT3,SYK,GRN,EDEM1,ENO1,FBXW11,LPCAT3,CSNK1A1,RIPK2,SGTA,PML,TNFRSF1B,HSPD1,IST1,ARIH1,PSME2,REST,PTK2B,CDC20
