# Supplementary material for: Proerythroblast Cells of Diamond-Blackfan Anemia Patients With RPS19 and CECR1 Mutations Have Similar Transcriptomic Signature
Source: Front Physiol. 2021 Jun 11;12:679919. doi: 10.3389/fphys.2021.679919 (PMC8226250; doi:10.3389/fphys.2021.679919)
Supplement: Supplementary file 12 [file Table_6.XLSX]

## Sheet: Sheet1
Supplementary Table 4. Up and down-regulated genes in proerythroblasts of DBA patients.
PRODBA1_1	PRODBA1_2	PRODBA2_1	PRODBA2_2	PRODBA3_1	PRODBA3_2
Up-regulated, 732 genes	Down-regulated, 440 genes	Up-regulated, 883 genes	Down-regulated, 455 genes	Up-regulated, 830 genes	Down-regulated, 433 genes
BAZ2A	PRTN3	PRTN3	HIST1H4H	BAZ2A	HIST1H4H
HMOX1	HIST1H4H	BAZ2A	HMOX1	HMOX1	CTSG
SERPINB2	AZU1	AZU1	HIST1H4D	SERPINB2	HIST1H4D
HLA-DRB1	HIST1H4D	SERPINB2	MRPL14	HLA-DRB1	MRPL14
CAMTA2	MRPL14	CTSG	EPB42	STMN3	EPB42
ORC1	RALGAPA2	HLA-DRB1	RALGAPA2	CAMTA2	RALGAPA2
NUMB	AGAP5	STMN3	CA1	ORC1	CST7
H2AFY	CNRIP1	CAMTA2	AGAP5	NUMB	CA1
CHP1	C12ORF65	ORC1	CNRIP1	H2AFY	AGAP5
TPP2	EBPL	NUMB	C12ORF65	CHP1	CNRIP1
NT5C2	ALOX12	H2AFY	EBPL	TPP2	C12ORF65
HPCAL1	CHD4	CHP1	ALOX12	NT5C2	EBPL
P4HB	HIST1H3C	CST7	CHD4	HPCAL1	ALOX12
COPZ1	COBRA1	TPP2	HIST1H3C	P4HB	CHD4
CA1	PRKAB1	NT5C2	NR4A2	COPZ1	HIST1H3C
PTBP1	RPL9	HPCAL1	COBRA1	PTBP1	COBRA1
CASP3	HIST1H2BL	P4HB	AHSP	CASP3	CECR1
SEC61A1	LIN37	COPZ1	HBB	SEC61A1	PRKAB1
SNORA70	BRCA1	PTBP1	PRKAB1	SNORA70	RPL9
PHPT1	HIST1H2BD	CASP3	KLF4	PHPT1	HIST1H2BL
SMOX	CCDC159	SEC61A1	RPL9	AHSP	LIN37
NR4A2	STRN	SNORA70	HIST1H2BL	AP2M1	BRCA1
AHSP	ASNA1	PHPT1	LIN37	TPP1	HIST1H2BD
AP2M1	ZBED5	SMOX	BRCA1	NOP2	CCDC159
TPP1	RPS27	AP2M1	HIST1H2BD	FARSA	STRN
NOP2	HDGFRP3	TPP1	CCDC159	EZR	ASNA1
FARSA	BTAF1	NOP2	STRN	PAFAH1B2	ZBED5
EZR	HIST1H2AI	FARSA	ASNA1	RBM4	RPS27
PAFAH1B2	LOC606724	EZR	ZBED5	ABHD2	HDGFRP3
HBB	MCTP2	CECR1	NCS1	FCGR2A	BTAF1
RBM4	MARCH3	PAFAH1B2	RPS27	GHITM	HIST1H2AI
ABHD2	NOTCH2NL	RBM4	HDGFRP3	KCNAB2	HIST1H3B
FCGR2A	NPM3	ABHD2	BTAF1	ACO2	LOC606724
GHITM	CCDC6	FCGR2A	GADD45B	STRADB	MCTP2
KCNAB2	CHRAC1	GHITM	HIST1H2AI	LENG8	MARCH3
ACO2	TBC1D1	KCNAB2	HIST1H3B	PPP4C	NOTCH2NL
STRADB	NOL9	ACO2	LOC606724	IL1RN	NPM3
LENG8	DOCK11	STRADB	MCTP2	CCNT1	CCDC6
PPP4C	SMG9	LENG8	MARCH3	C1QBP	CHRAC1
IL1RN	DARS	PPP4C	DNAJB1	PRMT1	TBC1D1
CCNT1	NEMF	CCNT1	FOSB	ZFAND2A	RGS2
C1QBP	RILP	C1QBP	NOTCH2NL	HBP1	NOL9
PRMT1	MBNL1	PRMT1	NPM3	ATPAF1	DOCK11
ZFAND2A	ATXN2	ZFAND2A	CCDC6	AP1M1	SMG9
HBP1	BOLA2B	HBP1	CHRAC1	CTNNB1	DARS
ATPAF1	DUSP18	ATPAF1	TBC1D1	ATF6	NEMF
AP1M1	TNFAIP1	AP1M1	RGS2	MAP2K3	RILP
CTNNB1	BCKDHB	CTNNB1	RABIF	H1FX	MBNL1
ATF6	FAM100A	ATF6	NOL9	ZNFX1	ATXN2
MAP2K3	MMACHC	MAP2K3	HIST1H2BE	ITGA5	BOLA2B
H1FX	WRNIP1	H1FX	DOCK11	NCS1	DUSP18
ZNFX1	PIGS	ZNFX1	SMG9	HADHA	TNFAIP1
ITGA5	DPAGT1	ITGA5	DARS	GADD45B	BCKDHB
NCS1	PPA2	HADHA	NEMF	ARHGAP1	FAM100A
HADHA	MITF	ARHGAP1	RILP	SKI	MMACHC
GADD45B	PSMG1	SKI	MBNL1	SPRED2	PIGS
ARHGAP1	DLC1	SPRED2	ATXN2	IER5	DPAGT1
SKI	ARHGEF18	IER5	BOLA2B	KLF6	PPA2
SPRED2	KIAA0101	KLF6	DUSP18	SLBP	MITF
IER5	C16ORF62	SLBP	TNFAIP1	ECD	PSMG1
KLF6	ZNRF2	ECD	BCKDHB	RPN2	DLC1
SLBP	CDC16	RPN2	FAM100A	PSMD11	ARHGEF18
ECD	RNF7	PSMD11	MMACHC	AFF1	KIAA0101
RPN2	ASH1L-AS1	AFF1	PIGS	ADM	C16ORF62
PSMD11	KAT6A	SLC16A1	DPAGT1	SLC16A1	ZNRF2
AFF1	EIF4G1	TMEM176B	PPA2	TMEM176B	CDC16
ADM	PFKP	NET1	MITF	UBE2S	RNF7
SLC16A1	DDX26B	NUP214	PSMG1	NET1	ASH1L-AS1
UBE2S	SLC11A2	NOLC1	DLC1	NUP214	KAT6A
NET1	GTF3C1	MPO	KIAA0101	NOLC1	EIF4G1
NUP214	PEX13	PDLIM7	C16ORF62	PDLIM7	PFKP
NOLC1	HIST1H2BF	ARMC8	ZNRF2	BCL2L11	DDX26B
PDLIM7	DNAJB9	VDAC1	RNF7	EGR2	SLC11A2
BCL2L11	FLJ43663	SEPT6	ASH1L-AS1	ARMC8	PLK2
EGR2	POLR2D	TFDP2	KAT6A	VDAC1	GTF3C1
ARMC8	ITM2A	MEPCE	EIF4G1	SEPT6	PEX13
VDAC1	KDM2A	HIPK3	PFKP	TFDP2	HIST1H2BF
RABIF	RAB32	PIK3AP1	DDX26B	MEPCE	DNAJB9
SEPT6	SORD	ASF1B	SLC11A2	HIST1H2BE	POLR2D
TFDP2	ATXN1L	PDS5A	PLK2	HIPK3	ITM2A
MEPCE	NCAPH	MMS19	GTF3C1	PIK3AP1	KDM2A
HIST1H2BE	HIST2H2AB	CAPZA1	PEX13	ASF1B	SORD
HIPK3	SLC35B1	INPP5D	HIST1H2BF	PDS5A	ATXN1L
PIK3AP1	BLOC1S1	KLF13	DNAJB9	MMS19	RPLP1
ASF1B	TAB3	CSF3R	HIST1H2BI	CAPZA1	NCAPH
PDS5A	PAN3	RPL8	POLR2D	INPP5D	HIST2H2AB
CAPZA1	ATP5G3	SLC30A1	NFKBIA	BAG3	PILRB
INPP5D	PCID2	WASH3P	ITM2A	KLF13	RPS25
BAG3	IGF1R	CCNB2	KDM2A	CSF3R	SLC35B1
KLF13	KTI12	CLK3	ZFP36L1	RPL8	RAPGEF2
CSF3R	ZBTB2	QSOX1	SORD	SLC30A1	BLOC1S1
RPL8	TCEB1	SUPT5H	ATXN1L	WASH3P	TAB3
SLC30A1	PSMB1	PPRC1	RPLP1	CCNB2	CUL3
WASH3P	RPLP2	EHMT2	NCAPH	CLK3	ATP5G3
CCNB2	RPL36	ATP5F1	HIST2H2AB	QSOX1	PCID2
CLK3	TNRC18	PUM2	SLC35B1	SUPT5H	FKBP5
QSOX1	H2AFV	BCKDK	SGMS1	PPRC1	RNF138
SUPT5H	CALM3	NREP	RAPGEF2	EHMT2	IGF1R
PPRC1	NUMA1	ADNP2	BLOC1S1	ATP5F1	KTI12
EHMT2	OSBPL2	COPE	TAB3	PUM2	ZBTB2
ATP5F1	UBA52	PSMB3	CUL3	BCKDK	TCEB1
PUM2	FLOT1	GATA1	DNAJA4	WRNIP1	RPLP2
BCKDK	CCP110	PTPN1	ATP5G3	NREP	RPL36
NREP	PSEN1	CHCHD3	PCID2	ADNP2	H2AFV
ADNP2	ATP6V0B	GPX1	FKBP5	COPE	RNASEH2A
COPE	RTFDC1	PPDPF	IGF1R	PSMB3	NUMA1
PSMB3	SCAF11	PCMTD2	TRIB1	GATA1	OSBPL2
GATA1	GATC	TIMM23	KTI12	PTPN1	FLOT1
PTPN1	METAP1	HLA-DPA1	ZBTB2	CHCHD3	CCP110
CHCHD3	LMNA	ANPEP	TCEB1	GPX1	PSEN1
GPX1	LCLAT1	GPS1	RPLP2	PPDPF	SCAF11
PPDPF	HIST1H2AH	C10ORF47	RPL36	PCMTD2	GATC
PCMTD2	HIST1H2BH	HDLBP	H2AFV	TIMM23	METAP1
TIMM23	LAMP2	INSIG1	RNASEH2A	HLA-DPA1	MXI1
HLA-DPA1	RNF114	NUCB2	CALM3	ANPEP	LCLAT1
ANPEP	RPL7L1	CAPNS1	NUMA1	GPS1	HIST1H2AH
GPS1	TMCO1	FEM1B	OSBPL2	C10ORF47	HIST1H2BH
C10ORF47	INPP5K	RARA	FLOT1	TMED5	LAMP2
TMED5	RREB1	KCTD10	CCP110	HDLBP	RNF114
HDLBP	HIST1H2BC	EEF1D	PSEN1	CAPNS1	RPL7L1
INSIG1	GNL1	RHOB	HIST2H2BE	FEM1B	TMCO1
CAPNS1	UBA2	SEPT11	ATP6V0B	RARA	INPP5K
FEM1B	CNST	TOMM40	SCAF11	KCTD10	RREB1
RARA	ACTR10	CTSD	GATC	EEF1D	GNL1
KCTD10	ARL6IP6	DRAP1	METAP1	RHOB	UBA2
EEF1D	NCOA7	BIN2	MXI1	SEPT11	NSMCE1
RHOB	WDR5	MBD6	LMNA	HLA-A	RPS26
SEPT11	IGBP1	DROSHA	LCLAT1	TOMM40	CNST
HLA-A	HMBS	FGR	HIST1H2AH	CTSD	ACTR10
TOMM40	ITGB1	SH3BP1	HIST1H2BH	DRAP1	ARL6IP6
CTSD	PAK2	SLC20A1	LAMP2	BIN2	NCOA7
DRAP1	PTAR1	SIN3A	RNF114	MBD6	WDR5
BIN2	S100A4	RALGDS	RPL7L1	DROSHA	IGBP1
MBD6	ARSB	ALYREF	TMCO1	FGR	ITGB1
DROSHA	PPP1R8	ARID1B	INPP5K	SH3BP1	PAK2
FGR	ARFGAP2	RNPEP	RREB1	SLC20A1	PTAR1
SH3BP1	THUMPD2	TRABD	HIST1H2BC	SIN3A	HIST1H3A
SLC20A1	ZNF776	BRI3BP	RPS26	NEU1	PPP1R8
SIN3A	SNORA63	PSAP	CNST	RALGDS	ARFGAP2
NEU1	METTL17	CYLD	ACTR10	ALYREF	ZNF776
RALGDS	AAGAB	TYROBP	ARL6IP6	RNPEP	SNORA63
ALYREF	CLIC4	ATP2B4	HIST1H2AJ	TRABD	CLIC4
ARID1B	LOC100506844	IKZF5	NCOA7	BRI3BP	LOC100506844
RNPEP	TBRG1	TSPYL1	WDR5	PSAP	SRD5A3
PSAP	C5ORF30	STX11	IGBP1	CYLD	C5ORF30
CYLD	PEMT	ZDHHC3	HMBS	TYROBP	PEMT
TYROBP	UGP2	ARCN1	ITGB1	ATP2B4	SNORA70B
ATP2B4	SNORA70B	SARS	POLR1C	IKZF5	USP8
IKZF5	USP8	UNK	PAK2	TSPYL1	MRPL11
TSPYL1	TNFAIP3	LIG1	S100A4	STX11	SNAPIN
STX11	NPC2	ADAR	HIST1H3A	ZDHHC3	RPS20
ZDHHC3	MRPL11	TRAPPC1	ARSB	ARCN1	CD83
ARCN1	SNAPIN	KPNA4	PPP1R8	SARS	SPARC
SARS	RPS20	DHX9	ARFGAP2	UNK	CCDC174
UNK	RFX1	ATP5O	THUMPD2	LIG1	SYPL1
LIG1	CD83	BRAF	ZNF776	ADAR	TMEM14B
ADAR	SPARC	CD63	SNORA63	TRAPPC1	TAF3
TRAPPC1	SYPL1	RHOH	AAGAB	KPNA4	QSER1
KPNA4	TAF3	YWHAH	CLIC4	FLJ43663	MPL
DHX9	QSER1	RTF1	LOC100506844	DHX9	GGA3
ATP5O	MPL	CCDC88A	C5ORF30	ATP5O	HIST1H2BN
BRAF	GGA3	MYH9	PEMT	BRAF	PUM1
RHOH	PUM1	ARRDC3	SNORA70B	CD63	COX5A
YWHAH	COX5A	NFKB2	USP8	RHOH	AREG
RTF1	NDUFS3	TTLL12	TNFAIP3	YWHAH	MFSD1
CCDC88A	EXOSC9	DENND1A	MRPL11	RTF1	STIL
MYH9	AREG	ATG3	SNAPIN	CCDC88A	NCOA6
NFKBIA	DUSP11	TBC1D9B	RPS20	MYH9	HIVEP1
ARRDC3	DUSP1	RAB32	CD83	ARRDC3	FRY
NFKB2	MFSD1	BCL2L1	CCDC174	NFKB2	USF1
TTLL12	STIL	MPRIP	TMEM14B	TTLL12	PIP5K1B
DENND1A	HIVEP1	PPIF	TAF3	DENND1A	HIVEP2
ATG3	FRY	RAF1	QSER1	ATG3	NBPF10
TBC1D9B	RPL37A	MDK	SERTAD1	TBC1D9B	CLC
BCL2L1	PIP5K1B	SRSF9	IFFO2	RAB32	PPP2CB
IL8	HIVEP2	EPHB6	GGA3	BCL2L1	FECH
ZFP36L1	PPP2CB	ATXN10	HIST1H2BN	IL8	MRPL17
MPRIP	FECH	TALDO1	PUM1	ZFP36L1	ST7
PPIF	MRPL17	MTPN	COX5A	MPRIP	ARMC10
RAF1	ST7	DCPS	EXOSC9	PPIF	MTMR14
MDK	ARMC10	CXXC5	AREG	RAF1	TRUB2
SRSF9	EDF1	PILRB	DUSP11	MDK	SMEK1
TALDO1	SYNCRIP	TNPO3	DUSP1	SRSF9	SACM1L
MTPN	TAF10	RPS25	HIST1H2AC	ATXN10	FBXO42
DCPS	MTMR14	SNRPA	FOS	TALDO1	ATG2B
CXXC5	TRUB2	GPS2	STIL	MTPN	VPS29
TNPO3	SMEK1	FLOT2	NCOA6	DCPS	PCBP1
SNRPA	SACM1L	LIMK1	HIVEP1	CXXC5	ERI3
GPS2	FBXO42	MAFB	FRY	TNPO3	LOC550643
FLOT2	ATG2B	LPCAT3	USF1	SNRPA	RC3H1
LIMK1	LINC00641	DDX39A	PIP5K1B	GPS2	C7ORF73
LPCAT3	VPS29	ERLEC1	DUSP10	FLOT2	C16ORF70
LRRC25	PCBP1	LAMTOR1	HIVEP2	LIMK1	IARS
DDX39A	ERI3	BAG6	NBPF10	MAFB	ANKRD36
LAMTOR1	RC3H1	STRAP	PPP2CB	LPCAT3	HERPUD2
CXCL2	AMFR	SFT2D2	FECH	LRRC25	SNORA68
BAG6	SNRPB	PTPRE	MRPL17	DDX39A	RPLP0
STRAP	PSMD6	NFIC	ST7	LAMTOR1	LSM2
SFT2D2	C7ORF73	SOX12	EDF1	CXCL2	CD69
PTPRE	XRCC6BP1	PYGL	SYNCRIP	BAG6	CPA3
NFIC	IARS	PSMB1	TAF10	STRAP	C6ORF106
SOX12	HERPUD2	NDEL1	MTMR14	SFT2D2	CIITA
NDEL1	SNORA68	ZCCHC2	TRUB2	PTPRE	SSFA2
ZCCHC2	RNF5	TNRC18	SMEK1	NFIC	KLHDC3
SMC1A	LSM2	SMC1A	SACM1L	SOX12	KIF22
FAH	CD69	FAH	FBXO42	PSMB1	SERPINB6
C1ORF43	CPA3	C1ORF43	ATG2B	NDEL1	PIAS1
STIP1	C6ORF106	STIP1	PCBP1	ZCCHC2	CCNL1
AMBRA1	MEST	ASAP2	ERI3	SMC1A	PRKRA
ASAP2	SSFA2	ZC3HAV1	LOC550643	FAH	PTPLAD1
ZC3HAV1	KLHDC3	TRAM1	RC3H1	UBA52	DYNLL1
SCYL2	KAT2A	SCYL2	AMFR	C1ORF43	CREB3
ARPC1B	KIF22	ARPC1B	SNRPB	STIP1	RPS21
GATAD2B	CCNL1	GATAD2B	PSMD6	AMBRA1	ACSS1
PRMT5	PRKRA	PRMT5	C7ORF73	ZC3HAV1	MSN
ATP5A1	PTPLAD1	AIF1	C16ORF70	SCYL2	TMSB10
C16ORF72	CREB3	ATP5A1	XRCC6BP1	ARPC1B	SMARCA4
GNA13	PLVAP	C16ORF72	IARS	GATAD2B	KANSL1L
C12ORF57	MSN	GNA13	ATP1B2	PRMT5	PAPD7
GRN	MOV10	C12ORF57	HIST1H4E	ATP5A1	SUZ12
GYPC	JAGN1	GRN	HERPUD2	C16ORF72	NAP1L1
NDUFV2	SMARCA4	GYPC	SNORA68	GNA13	BLNK
PSMB2	KANSL1L	NDUFV2	RNF5	C12ORF57	HSP90B1
TOMM22	PAPD7	BST1	RPLP0	GRN	RPL19
SMU1	SUZ12	PSMB2	CD69	GYPC	RPS28
TRAF7	NAP1L1	TOMM22	SPHK1	NDUFV2	EIF4G3
GATA2	MALAT1	SMU1	C6ORF106	BST1	ERGIC2
PRRC2A	HSP90B1	TRAF7	SSFA2	PSMB2	CCDC94
NAGA	RPL19	CSNK1E	KLHDC3	TOMM22	HIST1H2BM
LRRC57	SPIN4	GATA2	KIF22	SMU1	INO80
SNX5	HIST1H4C	PRRC2A	PIAS1	TRAF7	TMEM33
PTCD3	KIAA1467	NAGA	CCNL1	CSNK1E	CRLF3
SUMF2	ERGIC2	LRRC57	PRKRA	GATA2	FBXW7
POLR2G	CCDC94	SNX5	PTPLAD1	PRRC2A	WHSC2
FAM117A	INO80	PTCD3	DYNLL1	NAGA	SSBP1
NDRG1	TMEM33	SUMF2	RPS21	LRRC57	HIST1H4B
HJURP	FBXW7	POLR2G	PLVAP	SNX5	DDX17
FOXO3	WHSC2	FAM117A	MSN	PTCD3	HSPA9
MRPL38	SSBP1	NDRG1	TMSB10	SUMF2	NSMCE4A
PSMD7	DDX17	FOXO3	MOV10	POLR2G	RNF115
PSMC5	HSPA9	MRPL38	SMARCA4	FAM117A	C2ORF47
ATP6V1B2	RNF115	PSMD7	KANSL1L	NDRG1	PDIA3
SNORA28	C2ORF47	VKORC1	PAPD7	HJURP	GPSM2
DUSP7	GPSM2	PSMC5	SUZ12	FOXO3	GBF1
CHCHD2	GBF1	ATP6V1B2	HIST1H3J	MRPL38	DUSP6
YWHAQ	MRPL18	NUS1	RPS15A	PSMD7	CAND1
PFDN5	DUSP6	LRPAP1	SESN2	VKORC1	ARL6IP5
SATB1	ARL6IP5	SNORA28	RPL19	TUBB6	YEATS2
TUBB2A	TDG	UHRF1	RPS28	PSMC5	TDG
GZMB	G3BP2	CHCHD2	HIST1H4C	ATP6V1B2	G3BP2
IFITM2	LMO4	YWHAQ	MBNL2	SNORA28	LMO4
SELO	SF3B14	PFDN5	KIAA1467	UHRF1	SF3B14
DDOST	EXOSC8	SATB1	CCDC94	DUSP7	EXOSC8
ANKRD13A	HIST1H1C	IFITM2	HIST1H2AM	CHCHD2	HIST1H1C
YLPM1	IPO5	SELO	HIST1H2BM	YWHAQ	IPO5
KHSRP	SAP30BP	CCNC	INO80	PFDN5	DYRK1A
SIGMAR1	PDE6D	DDOST	TMEM33	SATB1	NRAS
VCP	NRAS	ANKRD13A	FBXW7	TUBB2A	ID2
PCNP	TRPS1	YLPM1	WHSC2	GZMB	TRPS1
FIBP	COA1	LAMTOR5	SSBP1	IFITM2	MRPL43
ARL6IP1	ISOC1	KHSRP	HIST1H4B	CCNC	ZNF207
RGCC	TBK1	SIGMAR1	HSPA9	FN3K	COA1
CENPC1	RFXANK	POFUT2	C2ORF47	ANKRD13A	TBK1
TIPARP	YY1	VCP	GPSM2	YLPM1	RFXANK
ERP29	LSMD1	PCNP	NXF1	KHSRP	YY1
IFITM3	LDB1	FIBP	TIMP1	SIGMAR1	LSMD1
ZNF276	TMEM131	ARL6IP1	GBF1	POFUT2	JMJD1C
EBNA1BP2	ZNF131	RGCC	MRPL18	VCP	ZNRD1
ERGIC3	SNHG11	CAMK2G	DUSP6	PCNP	TMEM131
SLC39A8	NCKAP1L	CENPC1	CAND1	FIBP	ZNF131
SIK3	ATP5G2	TIPARP	ARL6IP5	ARL6IP1	NCKAP1L
PSMD13	KXD1	ERP29	YEATS2	RGCC	TRAK1
MYADM	ESCO2	IFITM3	LMO4	CAMK2G	KXD1
PFN1	PSIMCT-1	RPL24	SF3B14	CENPC1	MTA2
PLEKHM1	VCPIP1	ZNF276	HIST1H1C	THUMPD2	CRAT
ELP5	ATPIF1	EBNA1BP2	IPO5	TIPARP	PDZD11
IFNAR2	SUV420H1	ERGIC3	RABGEF1	IFITM3	ESCO2
CCNJ	CDC23	LOC729737	SAP30BP	RPL24	VCPIP1
CDK4	GTF3A	VPS13C	DYRK1A	ZNF276	PSMA6
TRAPPC10	AGTRAP	SLC39A8	NRAS	EBNA1BP2	RCL1
TPRG1L	TAF2	ATP6V0C	TRPS1	ERGIC3	ELL2
AP1B1	FDFT1	PPP1R14B	MRPL43	LOC729737	SUV420H1
APOC1	TADA3	SIK3	ZNF207	SLC39A8	CDC23
RHEB	CYP51A1	PSMD13	COA1	ATP6V0C	AGTRAP
CREBBP	MYB	PFN1	TBK1	PPP1R14B	SLC50A1
JTB	MTCH2	PLEKHM1	YY1	SIK3	TAF2
ZNF142	TJP2	ELP5	LSMD1	PSMD13	FDFT1
IFITM1	G3BP1	IFNAR2	JMJD1C	MYADM	TADA3
SLC25A5	CEP350	CDK4	ABHD5	PFN1	CYP51A1
FOXP1	TOR1B	TRAPPC10	LDB1	PLEKHM1	NFYC
SERPINB1	KIAA0100	TPRG1L	TMEM131	ELP5	PI4KA
JOSD1	NDUFB5	TBRG1	ZNF131	IFNAR2	G3BP1
THBS1	ETV6	AP1B1	KXD1	CCNJ	CEP350
UQCRC2	MAN1A1	RHEB	MTA2	CDK4	TOR1B
C20ORF111	RPRD1B	JTB	EMP3	TRAPPC10	KIAA0100
NARF	WWP2	ZNF142	PDZD11	TPRG1L	C10ORF12
SEPHS2	SUMO3	IFITM1	ESCO2	AP1B1	AGAP6
CTDNEP1	PCIF1	SLC25A5	HIST2H2AC	APOC1	CDK2AP2
SNRPA1	KDSR	FOXP1	PSIMCT-1	RHEB	MAN1A1
ATP5SL	RPS4X	SERPINB1	VCPIP1	JTB	OSBPL9
PSME1	ZC3H13	JOSD1	CBLL1	ZNF142	MRPS15
DDA1	ADCK3	UQCRC2	PSMA6	IFITM1	WWP2
CYBA	CCT8	C20ORF111	RCL1	SLC25A5	SUMO3
C14ORF166	HOXA7	NARF	ELL2	FOXP1	PCIF1
JUND	UQCR11	SEPHS2	SUV420H1	SERPINB1	RPS4X
CORO1C	EIF2C3	CTDNEP1	CDC23	JOSD1	KIAA0922
LRRFIP1	PPFIA1	SNRPA1	SLC50A1	THBS1	ZC3H13
UBR4	NISCH	ATP5SL	TAF2	UQCRC2	KPNA6
RNF130	ZXDC	PSME1	MYB	C20ORF111	ADCK3
CST3	C17ORF70	DDA1	MTCH2	NARF	WARS
LSP1	ANP32B	CYBA	NFYC	SEPHS2	FAM126B
OTUB1	RPS19	NPC2	SRSF3	CTDNEP1	HOXA7
KIAA0317	MAPK6	C14ORF166	TJP2	SNRPA1	EIF2C3
CTSW	BTBD7	SRGN	G3BP1	ATP5SL	PPFIA1
PDPK1	BAIAP2	JUND	CEP350	PSME1	UPF1
RAD23A	SYCE2	CORO1C	TOR1B	DDA1	ATAD1
C19ORF6	ITPK1	LRRFIP1	EGR1	CYBA	NISCH
SSR1	ATP5H	UBR4	AGAP6	C14ORF166	ZXDC
MSI2	CLDND1	RNF130	VPS37B	JUND	MAPK6
FXN	UBA1	CST3	MAN1A1	CORO1C	BTBD7
MSRB2	TMEM245	LSP1	TAGAP	LRRFIP1	SYCE2
SREBF2	SPPL3	OTUB1	RPRD1B	UBR4	ITPK1
SYK	ZNF295	KIAA0317	MRPS15	RNF130	DUSP3
SQSTM1	DHPS	CTSW	PCIF1	CST3	EPG5
HBD	TXNDC12	PDPK1	KDSR	LSP1	TMEM245
PGAM1	ACTN1	RAD23A	RPS4X	OTUB1	SPPL3
GRB2	KRTCAP2	PSMC2	KIAA0922	KIAA0317	TRAF4
EIF3F	STK17B	C19ORF6	S100A9	PDPK1	ZNF295
SERTAD1	SPECC1L	SSR1	ZC3H13	RAD23A	DHPS
CUTA	ZNF385A	MSI2	KPNA6	C19ORF6	C4ORF29
CHMP4B	SARS2	FXN	WARS	SSR1	STK17B
IFFO2	PILRA	MSRB2	DUSP2	MSI2	MLLT6
ZC3H4	RNF167	LANCL2	FAM126B	FXN	SPECC1L
ARNT	RNF169	SREBF2	UQCR11	MSRB2	RFX7
REXO1	COQ10B	SYK	EIF2C3	LANCL2	PILRA
CDKN1A	FAM13B	PGAM1	PPFIA1	SREBF2	RNF167
USP36	CXCR4	GRB2	ZXDC	SYK	HNRNPC
WHSC1	PRKCSH	EIF3F	MAPK6	SQSTM1	ADCY7
LY6E	UBA3	CUTA	BTBD7	HBD	COQ10B
USP22	WDR82	CHMP4B	VEGFA	PGAM1	PRKCSH
VMP1	CHD2	ZC3H4	BAIAP2	GRB2	UBA3
SHB	TAF1	ARNT	SYCE2	EIF3F	WDR82
WDR55	SEC24C	CDK6	PTGS2	CUTA	CHD2
PRPF19	MRPS9	ABI1	GTF2A1	CHMP4B	SEC24C
TJAP1	HEXIM1	REXO1	TMEM245	ARNT	MRPS9
NOP58	UXT	USP36	SPPL3	ABI1	SIAH2
PRPS1	PLXNC1	WHSC1	ZNF295	CDKN1A	HEXIM1
NFKBIB	RPS15	LY6E	C4ORF29	USP36	AZIN1
RAC2	DHFR	USP22	TXNDC12	WHSC1	PLXNC1
SMARCC2	HAUS4	VMP1	KRTCAP2	LY6E	SEMA4D
EIF4H	UBE2L3	NDUFS3	STK17B	USP22	NCOA3
MTX1	KIF5B	SHB	SPECC1L	VMP1	DHFR
DDB1	B4GALT3	WDR55	PILRA	SHB	HAUS4
SIK1	MIER3	VPS4A	HNRNPC	WDR55	UBE2L3
DUSP10	NAA50	PRPF19	ADCY7	VPS4A	B4GALT3
UROS	BCL7B	TJAP1	COQ10B	PRPF19	ZNHIT1
POLR2H	RPS3A	RAB5B	CXCR4	TJAP1	C11ORF24
PBX2	DRG1	NOP58	PRKCSH	UBE2A	BCL7B
GLUL	PPP5C	PRPS1	UBA3	NOP58	ATXN3
FKBP1A	PTDSS1	NFKBIB	WDR82	PRPS1	PTDSS1
PRPF38B	KLF10	RAC2	CHD2	FOS	SMG1P1
TBC1D14	LASP1	SMARCC2	SIAH2	NFKBIB	KLF10
HLA-DRA	USP25	EIF4H	HEXIM1	RAC2	FXYD5
RNF187	FXYD5	MTX1	ZBTB7A	SMARCC2	ARHGDIB
SNRPD3	ARHGDIB	DDB1	UXT	EIF4H	TMOD3
RAB5C	MRPL3	UROS	AZIN1	MTX1	FAM129B
SELT	TMOD3	POLR2H	NCOA3	DDB1	DR1
YBX1	FAM129B	PBX2	RPS15	UROS	SAT1
STAT3	DR1	GMPS	DHFR	POLR2H	ZNF496
PDLIM5	SAT1	GLUL	UBE2L3	PBX2	TSC1
DCXR	ZNF496	PPP2R3C	B4GALT3	GLUL	KIAA0232
ACTR3	ARHGAP35	FKBP1A	ZNHIT1	PPP2R3C	STAM
RSBN1	TP53	PRPF38B	NAA50	FKBP1A	QRICH1
HSPA5	CDK2AP1	CLNS1A	FTH1	PRPF38B	GPX7
BMPR2	SDHB	TBC1D14	DRG1	HLA-DRA	NRBF2
TXN	PCYT1A	HLA-DRA	PPP5C	RNF187	CALM1
MOB3A	C6ORF62	RNF187	RAB11FIP1	SNRPD3	FBRS
KDM5C	QRICH1	SNRPD3	ERMAP	RAB5C	GLB1
STOML2	MED1	RAB5C	KLF10	MTDH	PAIP2
PSMB7	APIP	MTDH	RACGAP1	SELT	SSR4
SKP2	CALM1	SELT	FAM129B	YBX1	RPL6
IFI30	SDF4	YBX1	DR1	STAT3	GSPT1
POLD2	RNASEK	STAT3	SAT1	DCXR	SLAIN2
DNM2	GLB1	PDLIM5	ZNF496	ACTR3	LOC387647
MCRS1	PAIP2	DCXR	VIM	LDHB	C19ORF24
CAPN1	REPS1	ACTR3	PRDX2	IL17RA	TUBA1B
ITGB2	SSR4	LDHB	HIST1H1B	RSBN1	CLK1
TUG1	RPL6	IL17RA	ARHGAP35	ESD	SRSF10
EIF5	SLAIN2	RSBN1	APOBEC3C	HSPA5	USP11
MKL1	C19ORF24	ESD	TSC1	BMPR2	MTMR10
JUNB	ADSL	HSPA5	TSC22D1	TXN	ZNF692
CHST11	CLK1	BMPR2	RAB7A	RASGEF1B	FBL
PPP1CA	KIAA0226	TXN	STAM	MOB3A	RHOC
CLTC	CAST	MOB3A	QRICH1	KDM5C	RBBP5
CPSF6	USP11	KDM5C	MED1	GPI	VTA1
TNFRSF1B	SF3B2	GPI	RNASEK	LSM7	YWHAB
EMC7	HIAT1	U2AF1	TXNL1	U2AF1	NEDD4
SLC7A5	CA5BP1	STOML2	RPL6	STOML2	TNPO2
TLE3	TOM1	PSMB7	SLAIN2	PSMB7	CCRN4L
MAP1LC3B2	TACC1	SKP2	HLA-B	SKP2	SCARNA12
TSC22D3	FBL	IFI30	WEE1	IFI30	AFF4
RAB22A	RBBP5	POLD2	TUBA1B	POLD2	NIPA2
EIF3D	VTA1	SLC9A3R1	KIAA0226	SLC9A3R1	RELB
BCKDHA	YWHAB	DNM2	XPO7	DNM2	HIST1H2BK
C7ORF26	NEDD4	MCRS1	RPS10	MCRS1	SS18
PHB	TNPO2	CAPN1	USP10	CAPN1	MSL2
HSP90AA1	FOXJ3	ITGB2	HK2	ITGB2	GLYR1
RNF10	SCARNA12	TUG1	CA5BP1	HLX	G6PD
CTDSP1	PTPN7	USE1	STON2	TUG1	TMEM141
FAM222B	TESC	EIF5	TOM1	EIF5	FNBP1
TSPAN3	SS18	CALR	RHOC	MKL1	WAC
SHC1	CCDC97	JUNB	RBBP5	JUNB	HERPUD1
LIMD2	BAG4	CHST11	CSRNP1	CHST11	RBM25
TMEM39A	MSL2	NPM1	UBXN7	NPM1	GSTM4
PLGRKT	GNL2	TESPA1	NEDD4	PPP1CA	SCAF4
TXNIP	IVD	PPP1CA	DDT	RPL36A	WASF1
TNIP1	GLYR1	RPL36A	SCARNA12	CLTC	RLF
MRPL53	TOPBP1	CLTC	AFF4	CPSF6	IP6K2
ZNF395	PPA1	CPSF6	SLC38A2	TNFRSF1B	RBM23
MPC1	C17ORF49	TNFRSF1B	RELB	EMC7	ANKRD28
EIF3E	INO80E	EMC7	RIT1	HIST1H4E	ST13
REST	DDX3X	SLC7A5	HIST1H2BK	SLC7A5	STUB1
CCT3	FNBP1	TLE3	DCLRE1B	TLE3	POLR2A
ANAPC13	DFFA	MAP1LC3B2	SS18	MAP1LC3B2	TCP1
ACSL3	GSTM4	RAB22A	SLC1A5	TSC22D3	PIP4K2A
FOXO1	NFKBIE	EIF3D	LYZ	RAB22A	ARHGEF7
EIF5A	CCT5	BCKDHA	TMEM141	EIF3D	RPL23
CTSZ	VDAC3	C7ORF26	UTP23	BCKDHA	RUVBL1
TLK2	RBM23	PHB	DDX3X	C7ORF26	TMEM248
AP3M1	NDUFAF3	HSP90AA1	TAGLN2	PHB	SNRPD2
RAB35	RAP1B	RAP1A	TMEM48	HSP90AA1	F11R
EIF3M	PHF10	RNF10	HERPUD1	RAP1A	TAOK3
RALY	RPL23	MARCH6	ALOX5AP	MARCH6	ATP2B1
C2CD2L	TMEM59	CTDSP1	POM121C	CTDSP1
ICAM2	RAN	FAM222B	RNF34	FAM222B
ZSWIM6	TIMM22	GRK6	UBAP1	GRK6
IP6K1	RPS23	TSPAN3	ANKRD28	SHC1
DDX24	UCHL3	CIITA	PHB2	LIMD2
PI4KB	REEP5	SHC1	POLR2E	TMEM39A
ACTN4	NHP2L1	RAB4B	DCAF5	GLT25D1
GIT1		LIMD2	CBL	PLGRKT
DERL1		TMEM39A	POLR2A	CLK2
STK24		GLT25D1	RUVBL1	TXNIP
SH3BGRL3		CLK2	EXOSC10	TNIP1
RPA1		MTHFD1	GLTSCR2	MRPL53
MAT2A		TXNIP	IPO4	ZNF395
DPF2		ABHD16A	KDM4C	EPOR
PXK		TNIP1	RPL30	MPC1
CDK13		MRPL53	RNF40	TRA2A
CNOT2		ZNF395	ARID1A	EIF3E
NAMPT		MPC1	RPL4	CCT3
H3F3B		TRA2A	GLRX	ANAPC13
MYBL2		EIF3E	ELK3	ACSL3
ARIH2		REST	RAD21	FOXO1
CCND2		CPNE2	ATP5J2	TOP1
RNF4		CCT3		EIF5A
TIMP2		ANAPC13		CTSZ
KCNN4		ACSL3		PA2G4
ATP6AP2		FOXO1		PPCS
RNASE2		TOP1		RNF216
FLNA		EIF5A		RAB35
GAPVD1		CTSZ		EIF3M
RPRD2		PA2G4		RALY
TPM3		TLK2		C2CD2L
OAZ1		PPCS		FUT11
BAD		RNF216		ICAM2
HSP90AB1		DOCK2		SH3GL1
SEPT2		AP3M1		DDX24
NXF1		RAB35		PCED1A
PSTPIP2		EIF3M		TGM2
CMTM6		RALY		HIST1H1D
WBP2		C2CD2L		PI4KB
HLA-DMA		FUT11		ACTN4
GOLGB1		ICAM2		DERL1
RPS5		SH3GL1		STK24
RBM8A		DDX24		CTSA
CD81		LOC100128881		SH3BGRL3
EFHD2		PCED1A		RPA1
UPK3BL		MALAT1		MAT2A
KLF3		PI4KB		DPF2
JAK1		ACTN4		PXK
CD36		GIT1		CDK13
HPS1		DERL1		NAMPT
EIF4EBP1		CTSA		CDC42SE2
H3F3A		SH3BGRL3		PPP1R10
GNAQ		RPA1		H3F3B
ADIPOR1		MAT2A		MYBL2
RFC2		DPF2		CCND2
MLL5		PXK		TIMP2
EPHX1		CDK13		KCNN4
COX6A1		CNOT2		GOT2
BRK1		CRLF3		ATP6AP2
ATP5L		NAMPT		RNASE2
ARF4		CDC42SE2		FLNA
AAR2		PPP1R10		GAPVD1
CDK9		H3F3B		RPRD2
RPL13		MYBL2		WASF2
RBM22		ARIH2		TPM3
EIF3C		CCND2		HSP90AB1
NAA15		NSMCE4A		SEPT2
ARID2		RNF4		SLC25A11
POLR1E		TIMP2		PSTPIP2
HMGB2		KCNN4		CMTM6
ACLY		GOT2		WBP2
GLCCI1		ATP6AP2		HLA-DMA
TOP2B		RNASE2		RPS5
ID2		FLNA		RBM8A
TRIOBP		GAPVD1		HNRNPU
METTL9		RPRD2		CD81
VAPA		WASF2		CLINT1
SHMT2		TPM3		EFHD2
ALAS1		BAD		UPK3BL
ATF4		SECISBP2		TRA2B
GNAI2		HSP90AB1		HADHB
KAT7		SEPT2		STX5
PFDN1		RWDD1		JAK1
DAZAP2		SLC25A11		EIF4EBP1
H2AFX		PSTPIP2		GNAQ
THAP1		CMTM6		ADIPOR1
PREX1		WBP2		HSPB1
UBE2M		HLA-DMA		MLL5
BSG		GOLGB1		EPHX1
ABHD5		RPS5		COX6A1
S100A11		RBM8A		PLK1
UFC1		HNRNPU		BRK1
AES		CD81		TFB2M
UBE2G2		CLINT1		ARF4
C2ORF68		EFHD2		AAR2
MED6		UPK3BL		SH2B1
DCTN5		HADHB		ATMIN
MCL1		JAK1		RBM22
LDLR		HPS1		EIF3C
PABPC3		EIF4EBP1		HP1BP3
DIAPH1		H3F3A		ARID2
ATP1A1		GNAQ		HMGB2
HIST1H3I		ADIPOR1		FLJ45340
NDUFB9		RFC2		METTL9
SLC25A39		HSPB1		VAPA
SRSF1		MLL5		SHMT2
SUPT7L		EPHX1		MAP7D1
MYD88		BRK1		ALAS1
TMED4		TFB2M		SHKBP1
THRAP3		RABL6		POLRMT
PHF12		LOC146880		ATF4
ARID4B		ATP5L		GNAI2
APRT		AAR2		KAT7
SSBP2		CDK9		PFDN1
GABARAP		SH2B1		DAZAP2
HSD17B11		RPL7A		PDE7A
PLAUR		RBM22		IDS
EPS15		EIF3C		H2AFX
PLAGL1		NAA15		C22ORF28
MBOAT7		HP1BP3		UBE2M
EHD1		ARID2		BSG
PCBD1		POLR1E		S100A11
MYBBP1A		HMGB2		UFC1
GNB1		FLJ45340		AES
C20ORF112		ACLY		UBE2G2
ANAPC16		TOP2B		PRDX5
EP300		TRIOBP		MED6
LMNB2		METTL9		FCN1
IER3		DGUOK		DCTN5
PTPN6		VAPA		MCL1
EIF1B		SHMT2		ZNF282
DCAF12		MAP7D1		TOMM34
PLIN2		ALAS1		FAM120A
TUBA1C		SHKBP1		CHMP4A
MAD2L1BP		POLRMT		LDLR
TFDP1		ATF4		SSU72
CHAMP1		MOGS		PABPC3
ABHD4		GNAI2		DIAPH1
GGH		KAT7		ATP1A1
ARL8B		PFDN1		HIST1H3I
ANKLE2		DAZAP2		NDUFB9
NOL11		PDE7A		SLC25A39
FSCN1		IDS		SRSF1
AKAP8L		C22ORF28		SUPT7L
SIRPA		BTBD10		PSMD2
KPNA2		PREX1		TMEM123
ENO1		UBE2M		MYD88
PRDX3		BSG		TMED4
EIF3L		UFC1		LRCH4
MLL4		AES		THRAP3
CERS2		UBE2G2		EAPP
SYAP1		PRDX5		PDPR
LSM12		C2ORF68		SLC3A2
HTRA2		MED6		PHF12
PRDM10		MCL1		ARID4B
IRF9		ZNF282		IL2RG
EIF2AK2		BZW2		XPOT
ATP5C1		TOMM34		COMMD1
MEGF9		FAM120A		SSBP2
CAPRIN1		CHMP4A		NME4
CTSC		LDLR		SSRP1
TOMM6		SSU72		GDI2
GSTP1		GAS5		GABARAP
UBXN1		PABPC3		PLAUR
LRRC59		DIAPH1		PLAGL1
SRP72		ATP1A1		MBOAT7
ATRAID		NDUFB9		HSD17B4
TES		PSMC1		EHD1
PSMF1		SLC25A39		PCBD1
UBE4B		SRSF1		GM2A
AMMECR1L		SUPT7L		HAT1
HIPK2		PSMD2		TAGAP
MASTL		TMEM123		MYBBP1A
KDM6B		MYD88		MAZ
KHDRBS1		TMED4		GNB1
CDC42SE1		LRCH4		C20ORF112
SLC43A3		THRAP3		ANAPC16
XBP1		ARPC3		SNORA70G
NDUFS8		EAPP		EP300
UBAP2		PDPR		LMNB2
C7ORF43		PKN1		IER3
COPS3		PHF12		EIF1B
DDX41		CAT		DCAF12
SLC40A1		ARID4B		PLIN2
CDC37		APRT		TUBA1C
CRIPT		IL2RG		MAD2L1BP
OGFOD1		XPOT		MRPS2
KPNA3		COMMD1		ITSN2
DNAJA2		SSBP2		PSME2
CPD		NME4		TKT
NAF1		GDI2		ABHD4
SMAP1		GABARAP		GGH
MTA1		HSD17B11		SP2
RIPK2		PLAGL1		ANKLE2
SLC30A7		PSMD12		NOL11
FAM60A		HNRNPR		FSCN1
CTSB		LSM3		PML
PDE4B		MBOAT7		GFM1
FAM168B		CD47		SIRPA
MCM5		HSD17B4		KPNA2
NGDN		PCBD1		ENO1
CTDSP2		GM2A		PRDX3
RCOR1		HAT1		EXOSC1
MEF2A		MYBBP1A		CFP
PTK2B		MAZ		DENND4A
EPC2		GNB1		TMED2
AKR1B1		ITM2B		MLL4
AP1G1		C20ORF112		CERS2
LOC643837		ANAPC16		SYAP1
MED13		SNORA70G		LSM12
CS		IQGAP2		HTRA2
TMEM189		LMNB2		PRDM10
BUB3		PTPN6		IRF9
PPP2R5E		EIF1B		ATP5C1
LOC388796		DCAF12		MEGF9
CSNK1A1		SCARB1		B4GALT5
ARIH1		BAK1		CAPRIN1
SGTA		STXBP2		CTSC
NCSTN		NCLN		GTF3C3
SSNA1		EEF1A1		TOMM6
MBD4		KIAA2013		GSTP1
IGF2BP2		CHAMP1		UBXN1
MRPL24		CD99		LRRC59
RIOK3		MRPS2		SRP72
ARPC2		PSME2		IL1B
EIF3A		COPA		TES
DANCR		TKT		PSMF1
CPSF7		GGH		AMMECR1L
SETD2		ANKLE2		HIPK2
RPS18		NOL11		CFLAR
ADPGK		FSCN1		MASTL
CORO1A		AKAP8L		KDM6B
ARHGAP17		PML		KHDRBS1
ZEB2		GFM1		CDC42SE1
ELF4		SIRPA		SLC43A3
ATP13A3		ENO1		TIMMDC1
HLA-DPB1		PRDX3		XBP1
PIAS2		EXOSC1		NDUFS8
NUP153		EIF3L		UBAP2
GSE1		DENND4A		C7ORF43
ARL8A		TMED2		DDX41
EWSR1		MLL4		SLC40A1
ZNRF1		CERS2		CDC37
THAP9-AS1		AK2		PGK1
TNFRSF1A		SYAP1		VAMP7
SRSF6		LSM12		ATP5B
MTMR2		HTRA2		DNAJA2
SSBP3		PRDM10		HSD17B12
SRPR		IRF9		SMCHD1
SPATA2		SMA5		NAF1
CSNK1D		EIF2AK2		RIPK2
SURF4		ATP5C1		SLC30A7
CIC		B4GALT5		FAM60A
MAML1		CAPRIN1		RPS8
NUFIP2		PSMD4		CTDSP2
EIF2B2		CTSC		IDH2
ACTB		GTF3C3		RCOR1
BHLHE40		TOMM6		MEF2A
TECR		GSTP1		MYL12B
ARF1		UBXN1		EPC2
RAE1		COMMD4		AKR1B1
NOP56		LRRC59		THOC6
RAB5A		SRP72		AP1G1
AP2S1		ATRAID		CACYBP
C12ORF10		PSMF1		MED13
SEPT9		SLC25A40		CS
NAP1L4		DAPK1		TMEM189
NUTF2		HIPK2		NFKBID
STRA13		CIZ1		BUB3
IRF2		LTBR		MKNK2
MRPL37		MASTL		PPP2R5E
NSL1		KHDRBS1		LOC388796
MLLT1		MPV17		CSNK1A1
SLC9A8		NCOA5		DDX39B
NOMO3		SLC43A3		SYNGAP1
PIK3R1		XBP1		EEF1G
TSN		CUX1		ARF5
ATXN2L		RPS27A		TMED10
ODC1		C7ORF43		DLST
CIRH1A		COPS3		SGTA
ZNF384		DDX41		NFKBIZ
ILK		SLC40A1		CDC20
MBD1		CDC37		UCP2
CAPG		PGK1		PELI1
TXN2		AKIRIN1		FAM53C
PIM2		CRIPT		SSNA1
GGA1		TRMT1		MGRN1
PACSIN2		VAMP7		EIF4B
CYTIP		ATP5B		PHLPP1
VPS25		DNAJA2		ARPC2
GATAD2A		CPD		PSMB4
LYN		HSD17B12		EIF3A
REL		NAF1		UBE2K
PYGO2		MTA1		NUP98
BANF1		RIPK2		SMG5
SNRNP200		FAM60A		DANCR
HEBP1		RPS8		RAB14
YTHDF3		MCM5		ILF2
LAMTOR3		IDH2		ADPGK
		MEF2A		ARHGAP17
		MYL12B		GTPBP1
		PTK2B		ZEB2
		EPC2		IST1
		APH1A		IDH3G
		AKR1B1		BCAS2
		THOC6		PPP2R2A
		AP1G1		RBM33
		CACYBP		SNRPC
		RPN1		CHMP1B
		KDELR1		NUP153
		CS		SSH2
		G6PC3		GSE1
		SPG21		SRRM2
		BUB3		ARL8A
		ARHGAP9		USP21
		LCP1		U2AF2
		TYMS		ZNRF1
		DDX39B		PHGDH
		EEF1G		EXOC7
		ARF5		TRRAP
		TMED10		LILRB4
		DLAT		SAMD4B
		NASP		RPS11
		NCSTN		THAP9-AS1
		UCP2		PPP2CA
		FAM53C		TNFRSF1A
		SSNA1		SRSF6
		MBD4		SSBP3
		IGF2BP2		SPATA2
		MGRN1		MAML1
		B4GALT1		TXLNG
		MRPL24		PTRHD1
		PNISR		ACTB
		ARPC2		PPP1R15A
		OGT		SLC12A6
		ILF3		MORF4L2
		PSMB4		EMC3
		FLI1		PNPLA2
		EIF3A		SUPT4H1
		UBE2K		BHLHE40
		NUP98		FAM160B1
		SMG5		RPL3
		CCNH		TECR
		ILF2		ARF1
		RPS18		RAE1
		ADPGK		NOP56
		RBCK1		EDEM1
		CORO1A		KPNA1
		ZDHHC5		NIPBL
		ARHGAP17		NAP1L4
		RPL7		NUTF2
		GTPBP1		MRPL37
		FMNL1		TRAP1
		ELF4		ANXA1
		IST1		TAF5L
		WDR36		ADRM1
		IDH3G		FBXW11
		PPP2R2A		SLC9A8
		SNRPC		ARRB2
		NUP153		NOMO3
		LAP3		ITGB7
		SSH2		MYL12A
		ISCU		TMEM106B
		GSE1		ODC1
		SRRM2		UBE2G1
		ARL8A		EIF3B
		ATP11B		MCM7
		USP21		DEGS1
		U2AF2		GMEB1
		EWSR1		ILK
		ZNRF1		MBD1
		CANX		SLC25A6
		EXOC7		TXN2
		TRRAP		PIM2
		LILRB4		TP53BP2
		HDAC2		KANSL1
		CCNI		CYTIP
		SAMD4B		SRA1
		BNIP2		ARL5B
		TNFRSF1A		TMBIM6
		MDH2		FBXO7
		SRSF6		SLIRP
		MTMR2		ARPC4
		NIT2		GARS
		COPS2		FAM214A
		SPATA2		TGFB1
		BAZ1A		LYN
		UBIAD1		MAP3K2
		SURF4		UBQLN1
		LOC100288069		SLC25A44
		CIC		DENND5A
		PRMT10		RHOA
		ACTB		NFKB1
		MORF4L2		GAPDH
		EMC3		PPP1R35
		PNPLA2		INTS9
		RPL3		CLIC1
		PELP1
		HSPD1
		PLEK
		MTG1
		EDEM1
		KPNA1
		SEPT9
		NAP1L4
		EIF2S3
		NSL1
		MBD2
		USP37
		FBXW11
		ARRB2
		PIK3R1
		SUB1
		TSN
		ODC1
		PSMA1
		SLC31A1
		EIF3B
		ZNF384
		ILK
		MBD1
		RNF41
		SLC25A6
		SF3A1
		CAPG
		FHL3
		TMEM66
		DLG4
		AK1
		SLIRP
		PPIB
		KAT5
		RPL13AP20
		RPL13A
		BANF1
		EIF4A1
		UBQLN1
		ZNF638
		NR1H2
		WDR1
		AURKAIP1
		BRAP
		MRPL48
		KIAA0664
		EIF3H
		LDHA
		DHX15
		RBBP4
		PSME4
		OAT
