# Supplementary material for: Proerythroblast Cells of Diamond-Blackfan Anemia Patients With RPS19 and CECR1 Mutations Have Similar Transcriptomic Signature
Source: Front Physiol. 2021 Jun 11;12:679919. doi: 10.3389/fphys.2021.679919 (PMC8226250; doi:10.3389/fphys.2021.679919)
Supplement: Supplementary file 13 [file Table_7.XLSX]

## Sheet: Sheet1
Supplementary Table 5. Altered transcription factor genes of DBA proerythroblasts
Gene Name (Transcription Factor)	log2 Fold Change
BAZ2A	6.28216
CAMTA2	4.5814
HBP1	3.92022
ATF6	3.82928
KLF6	3.5216
TFDP2	3.49489
KLF13	3.43405
SKI	3.28992
GATA1	3.26785
CHCHD3	3.1926
ADNP2	3.15275
RARA	3.11104
DRAP1	3.09651
IKZF5	2.96913
CXXC5	2.92087
NFIC	2.80728
MBD6	2.73463
GATAD2B	2.69206
SOX12	2.66414
EGR2	2.57002
ZNF142	2.42779
NFKB2	2.42457
FOXO3	2.32878
SREBF2	2.32703
GATA2	2.31469
FOXP1	2.30117
ZNF276	2.23754
SATB1	2.2119
ARNT	2.20498
PBX2	2.18303
JUND	2.15499
STAT3	2.09189
ZNF395	2.08726
YBX1	2.07445
MYBL2	2.0203
JUNB	1.9946
ARID2	1.89278
ATF4	1.7123
FOXO1	1.70597
PA2G4	1.63346
REST	1.60861
KAT7	1.58654
IRF9	1.58621
PLAGL1	1.47387
PRDM10	1.46448
XBP1	1.43705
ZNF282	1.40054
MEF2A	1.33916
CHAMP1	1.28817
MBD4	1.28551
ZEB2	1.2118
CUX1	1.1826
CIC	1.15136
ELF4	1.14508
BHLHE40	1.11564
MBD1	1.09507
RELB	-1.13099
ARHGAP35	-1.1765
NCOA3	-1.24258
KLF10	-1.29658
ZNF496	-1.3624
DR1	-1.38245
ZNF207	-1.54018
CREB3	-1.58362
ZXDC	-1.59163
TRPS1	-1.65571
ZNF131	-1.65809
YY1	-1.82984
HIVEP1	-1.9966
ZNF776	-2.14166
HIVEP2	-2.27313
RREB1	-2.67776
ZBTB2	-2.8456
MITF	-2.96372
KDM2A	-2.97376
ZBED5	-3.67882
